# Supplementary material for: Screening tools for predicting mortality of adults with suspected sepsis: an international sepsis cohort validation study
Source: PubMed Central journal article supplement — BMJ Open. 2023 Feb 20;13(2):e067840. doi: 10.1136/bmjopen-2022-067840 (PMC9944645; doi:10.1136/bmjopen-2022-067840), 2023-02-20
Supplement: bmjopen-2022-067840.draft_revisions.pdf [file bmjopen-2022-067840.draft_revisions.pdf]

# BMJ Open

BMJ Open is committed to open peer review. As part of this commitment we make the peer review history of every article we publish publicly available.

When an article is published we post the peer reviewers' comments and the authors' responses online. We also post the versions of the paper that were used during peer review. These are the versions that the peer review comments apply to.

The versions of the paper that follow are the versions that were submitted during the peer review process. They are not the versions of record or the final published versions. They should not be cited or distributed as the published version of this manuscript.

BMJ Open is an open access journal and the full, final, typeset and author-corrected version of record of the manuscript is available on our site with no access controls, subscription charges or pay-per-view fees (<http://bmjopen.bmj.com>).

If you have any questions on BMJ Open's open peer review process please email [info.bmjopen@bmj.com](mailto:info.bmjopen@bmj.com)

# BMJ Open

## The performance of screening tools for predicting mortality across multi-site international sepsis cohorts

|                               |                                                                                                                                                                                                                                                                                                                                                                                                                                                                                                                                                                                                                                                                                                                                                                                                                                                                                                                                                                                                                                                                                                                                                                                                                                                                                                                                                                                                                                                                                                                                                                                                                                                                                                                                                                                                                                                                                                                                                                                                                                                                                                                                                                                                                                                 |
|-------------------------------|-------------------------------------------------------------------------------------------------------------------------------------------------------------------------------------------------------------------------------------------------------------------------------------------------------------------------------------------------------------------------------------------------------------------------------------------------------------------------------------------------------------------------------------------------------------------------------------------------------------------------------------------------------------------------------------------------------------------------------------------------------------------------------------------------------------------------------------------------------------------------------------------------------------------------------------------------------------------------------------------------------------------------------------------------------------------------------------------------------------------------------------------------------------------------------------------------------------------------------------------------------------------------------------------------------------------------------------------------------------------------------------------------------------------------------------------------------------------------------------------------------------------------------------------------------------------------------------------------------------------------------------------------------------------------------------------------------------------------------------------------------------------------------------------------------------------------------------------------------------------------------------------------------------------------------------------------------------------------------------------------------------------------------------------------------------------------------------------------------------------------------------------------------------------------------------------------------------------------------------------------|
| Journal:                      | <i>BMJ Open</i>                                                                                                                                                                                                                                                                                                                                                                                                                                                                                                                                                                                                                                                                                                                                                                                                                                                                                                                                                                                                                                                                                                                                                                                                                                                                                                                                                                                                                                                                                                                                                                                                                                                                                                                                                                                                                                                                                                                                                                                                                                                                                                                                                                                                                                 |
| Manuscript ID                 | bmjopen-2022-067840                                                                                                                                                                                                                                                                                                                                                                                                                                                                                                                                                                                                                                                                                                                                                                                                                                                                                                                                                                                                                                                                                                                                                                                                                                                                                                                                                                                                                                                                                                                                                                                                                                                                                                                                                                                                                                                                                                                                                                                                                                                                                                                                                                                                                             |
| Article Type:                 | Original research                                                                                                                                                                                                                                                                                                                                                                                                                                                                                                                                                                                                                                                                                                                                                                                                                                                                                                                                                                                                                                                                                                                                                                                                                                                                                                                                                                                                                                                                                                                                                                                                                                                                                                                                                                                                                                                                                                                                                                                                                                                                                                                                                                                                                               |
| Date Submitted by the Author: | 05-Sep-2022                                                                                                                                                                                                                                                                                                                                                                                                                                                                                                                                                                                                                                                                                                                                                                                                                                                                                                                                                                                                                                                                                                                                                                                                                                                                                                                                                                                                                                                                                                                                                                                                                                                                                                                                                                                                                                                                                                                                                                                                                                                                                                                                                                                                                                     |
| Complete List of Authors:     | <p>Blair, Paul; Henry M Jackson Foundation for the Advancement of Military Medicine Inc, Austere environments Consortium for Enhanced Sepsis Outcomes (ACESO)</p> <p>Mehta, Rittal; Henry M Jackson Foundation for the Advancement of Military Medicine Inc</p> <p>Oppong, Chris; Komfo Anokye Teaching Hospital, Emergency Medicine</p> <p>Tin, Som; Takeo Provincial Referral Hospital</p> <p>Ko, Emily; Duke University School of Medicine</p> <p>Tsalik, Ephraim ; Duke University School of Medicine</p> <p>Chenoweth, Josh; Henry M Jackson Foundation for the Advancement of Military Medicine Inc</p> <p>Rozo, Michelle; Henry M Jackson Foundation for the Advancement of Military Medicine Inc</p> <p>Adams, Nehkonti; Naval Medical Research Center Infectious Diseases Directorate</p> <p>Beckett, Charmagne; Naval Medical Research Center Infectious Diseases Directorate</p> <p>Woods, Christopher; Duke University School of Medicine; Duke Global Health Institute</p> <p>Striegel, Deborah; Henry M Jackson Foundation for the Advancement of Military Medicine Inc</p> <p>Salvador, Mark G; Henry M Jackson Foundation for the Advancement of Military Medicine Inc</p> <p>Brandsma, Joost; Henry M Jackson Foundation for the Advancement of Military Medicine Inc</p> <p>McKean, Lauren; Henry M Jackson Foundation for the Advancement of Military Medicine Inc</p> <p>Mahle, Rachael; Duke University School of Medicine</p> <p>Hulsey, William R; Henry M Jackson Foundation for the Advancement of Military Medicine Inc</p> <p>Krishnan, Subramaniam; Henry M Jackson Foundation for the Advancement of Military Medicine Inc</p> <p>Prouty, Michael; US Naval Medical Research Unit No 2</p> <p>Letizia, Andrew; Naval Medical Research Unit-3 Ghana Detachment</p> <p>Fox, Anne; Naval Medical Research Unit-3 Ghana Detachment</p> <p>Faix, Dennis; US Naval Medical Research Unit No 2</p> <p>Lawler, James V; University of Nebraska Medical Center, Global Center for Health Security; University of Nebraska Medical Center, Department of Internal Medicine</p> <p>Duplessis, Chris; Austere environments Consortium for Enhanced Sepsis Outcomes (ACESO), Biological Defense Research Directorate, Naval</p> |

1  
2  
3  
4  
5  
6  
7  
8  
9  
10  
11  
12  
13  
14  
15  
16  
17  
18  
19  
20  
21  
22  
23  
24  
25  
26  
27  
28  
29  
30  
31  
32  
33  
34  
35  
36  
37  
38  
39  
40  
41  
42  
43  
44  
45  
46  
47  
48  
49  
50  
51  
52  
53  
54  
55  
56  
57  
58  
59  
60

|                  |                                                                                                                                                                                                                                                                                                                                                                                                                                                                                                                                                                                                                                                                                             |
|------------------|---------------------------------------------------------------------------------------------------------------------------------------------------------------------------------------------------------------------------------------------------------------------------------------------------------------------------------------------------------------------------------------------------------------------------------------------------------------------------------------------------------------------------------------------------------------------------------------------------------------------------------------------------------------------------------------------|
|                  | <p>Medical Research Center-Frederick<br/>         Gregory, Michael; Austere environments Consortium for Enhanced Sepsis Outcomes (ACESO), Biological Defense Research Directorate, Naval Medical Research Center-Frederick<br/>         Vantha, Te; Takeo Provincial Referral Hospital<br/>         Ofori, Alex Owusu; Komfo Anokye Teaching Hospital<br/>         Ansong, Samuel; Komfo Anokye Teaching Hospital<br/>         Oduro, George; Komfo Anokye Teaching Hospital<br/>         Schully, Kevin; Henry M Jackson Foundation for the Advancement of Military Medicine Inc<br/>         Clark, Danielle; Henry M Jackson Foundation for the Advancement of Military Medicine Inc</p> |
| <p>Keywords:</p> | <p>INFECTIOUS DISEASES, Adult intensive &amp; critical care &lt; ANAESTHETICS, Epidemiology &lt; INFECTIOUS DISEASES, Tropical medicine &lt; INFECTIOUS DISEASES, Public health &lt; INFECTIOUS DISEASES</p>                                                                                                                                                                                                                                                                                                                                                                                                                                                                                |
|                  |                                                                                                                                                                                                                                                                                                                                                                                                                                                                                                                                                                                                                                                                                             |

SCHOLARONE™  
Manuscripts

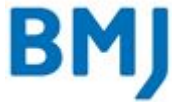

I, the Submitting Author has the right to grant and does grant on behalf of all authors of the Work (as defined in the below author licence), an exclusive licence and/or a non-exclusive licence for contributions from authors who are: i) UK Crown employees; ii) where BMJ has agreed a CC-BY licence shall apply, and/or iii) in accordance with the terms applicable for US Federal Government officers or employees acting as part of their official duties; on a worldwide, perpetual, irrevocable, royalty-free basis to BMJ Publishing Group Ltd ("BMJ") its licensees and where the relevant Journal is co-owned by BMJ to the co-owners of the Journal, to publish the Work in this journal and any other BMJ products and to exploit all rights, as set out in our [licence](#).

The Submitting Author accepts and understands that any supply made under these terms is made by BMJ to the Submitting Author unless you are acting as an employee on behalf of your employer or a postgraduate student of an affiliated institution which is paying any applicable article publishing charge ("APC") for Open Access articles. Where the Submitting Author wishes to make the Work available on an Open Access basis (and intends to pay the relevant APC), the terms of reuse of such Open Access shall be governed by a Creative Commons licence – details of these licences and which [Creative Commons](#) licence will apply to this Work are set out in our licence referred to above.

Other than as permitted in any relevant BMJ Author's Self Archiving Policies, I confirm this Work has not been accepted for publication elsewhere, is not being considered for publication elsewhere and does not duplicate material already published. I confirm all authors consent to publication of this Work and authorise the granting of this licence.

1  
2  
3 1 **Title:** The performance of screening tools for predicting mortality across multi-site international sepsis  
4 cohorts  
5  
6 2 cohorts  
7 3 **Authors:** Paul W. Blair<sup>1,2\*</sup>, Rittal Mehta<sup>1</sup>, Chris Oppong<sup>3</sup>, Tin Som<sup>4</sup>, Emily R. Ko<sup>5</sup>, Ephraim L. Tsalik<sup>5</sup>,  
8 Josh Chenoweth<sup>1</sup>, Michelle Rozo<sup>1</sup>, Nehkonti Adams<sup>6</sup>, Charmagne Beckett<sup>6</sup>, Christopher W. Woods<sup>5</sup>,  
9 Deborah A. Striegel<sup>1</sup>, Mark Salvador<sup>1</sup>, Joost Brandsma<sup>1</sup>, Lauren McKean<sup>1</sup>, Rachael E. Mahle<sup>5</sup>, William  
10 Hulsey<sup>1</sup>, Subramaniam Krishnan<sup>1</sup>, Michael Prouty<sup>7</sup>, Andrew Letizia<sup>8</sup>, Anne Fox<sup>8</sup>, Dennis Faix<sup>7</sup>, James V.  
11 Lawler<sup>9</sup>, Chris Duplessis<sup>10</sup>; Michael G Gregory<sup>10</sup>, Te Vantha<sup>4</sup>, Alex Owusu-Ofori<sup>3</sup>, Daniel Ansong<sup>3</sup>,  
12 George Oduro<sup>3</sup>, Kevin L. Schully<sup>1,10</sup>, and Danielle V. Clark<sup>1</sup>.

13  
14  
15  
16  
17  
18  
19  
20  
21 9 **Affiliation:**

22  
23 10 <sup>1</sup>Austere environments Consortium for Enhanced Sepsis Outcomes (ACESO), Henry M. Jackson  
24 Foundation for the Advancement of Military Medicine, Inc., Bethesda, MD, United States of America.  
25 11 <sup>2</sup>Johns Hopkins University School of Medicine, MD, United States of America. <sup>3</sup>Komfo Anokye  
26 Teaching Hospital, Kumasi, Ghana. <sup>4</sup>Takeo Provincial Referral Hospital, Takeo, Cambodia. <sup>5</sup>Duke  
27 University Division of Infectious Diseases, Duke University School of Medicine, Durham, NC, USA.  
28 12 <sup>6</sup>Naval Medical Research Center Infectious Diseases Directorate, Bethesda, MD. <sup>7</sup>Naval Medical  
29 Research Unit-2, Phnom Penh, Cambodia. <sup>8</sup>Naval Medical Research Unit-3 Ghana Detachment, Accra,  
30 Ghana. <sup>9</sup>Global Center for Health Security at Nebraska and Division of Infectious Disease, Department of  
31 Internal Medicine, University of Nebraska Medical Center, Omaha, NE, United States of America.  
32 13 <sup>10</sup>Austere environments Consortium for Enhanced Sepsis Outcomes (ACESO), Biological Defense  
33 Research Directorate, Naval Medical Research Center-Frederick, Ft. Detrick, MD, United States of  
34 America  
35 21

36  
37 22  
38  
39 23  
40  
41 24  
42  
43 25  
44  
45 26  
46  
47 27  
48  
49 28  
50  
51 29 **\*Corresponding Author:** Paul W. Blair, MD MSPH MHS. Henry M. Jackson Foundation for the  
52 Advancement of Military Medicine. 6720A Rockledge Dr, Bethesda, MD 20817. E-mail: pblair@aceso-  
53 sepsis.org  
54 30  
55  
56 31

1  
2  
3 **32 Abstract:**  
4

5 **33** Word count: 276  
6

7 **34 Objectives:** We evaluated the performance of commonly used sepsis screening tools across prospective  
8  
9 **35** sepsis cohorts in the United States, Cambodia, and Ghana.

10  
11 **36 Design:** Prospective cohort studies

12  
13 **37 Setting and participants:** From 2014 to 2021, participants with 2 or more SIRS (Systemic Inflammatory  
14  
15 **38** Response Syndrome) criteria and suspected infection were enrolled in emergency departments and  
16  
17 **39** medical wards at hospitals in the Cambodia and Ghana and hospitalized participants with suspected  
18  
19 **40** infection were enrolled in the United States. Cox proportional hazards regression was performed, and  
20  
21 **41** Harrell's C-statistic calculated to determine 28-day mortality prediction performance of the qSOFA score  
22  
23 **42**  $\geq 2$ , SIRS score  $\geq 3$ , NEWS  $\geq 5$ , MEWS  $\geq 5$ , or UVA score  $\geq 2$ . Screening tools were compared to baseline  
24  
25 **43** risk (age and sex) with the Wald test.  
26  
27

28  
29 **44 Results:** The cohorts included 567 participants (42.9% female) including 187 participants from Kumasi,  
30  
31 **45** Ghana, 200 participants from Takeo, Cambodia, and 180 participants from Durham, North Carolina in the  
32  
33 **46** United States. The pooled mortality was 16.4% at 28-days. The mortality prediction accuracy increased  
34  
35 **47** from baseline risk with the MEWS (C-statistic: 0.63, 95% CI: 0.58, 0.68;  $p=0.002$ ), NEWS (C-statistic:  
36  
37 **48** 0.68; 95% confidence interval [CI]: 0.64, 0.73;  $p<0.001$ ), qSOFA (C-statistic: 0.70, 95% CI: 0.64, 0.75;  
38  
39 **49**  $p<0.001$ ), UVA score (C-statistic: 0.73, 95% CI: 0.69, 0.78;  $p<0.001$ ), but not with SIRS (0.60; 95% CI:  
40  
41 **50** 0.54, 0.65;  $p=0.13$ ). Within individual cohorts, only the UVA score in Ghana performed better than  
42  
43 **51** baseline risk (C-statistic: 0.77; 95% CI: 0.71, 0.83;  $p<0.001$ ).  
44

45  
46 **52 Conclusions:** Among the cohorts, MEWS, NEWS, qSOFA, and UVA scores performed better than  
47  
48 **53** baseline risk, largely driven by accuracy improvements in Ghana, while SIRS scores did not improve  
49  
50 **54** prognostication accuracy. Prognostication scores should be validated within the target population prior to  
51  
52 **55** clinical use.

53  
54 **56** Keywords: Analysis, Survival; sepsis; Cohort Studies; Prognosis; Global Health  
55

56  
57

1  
2  
3 **58 Strengths and limitations of this study:**  
4

- 5 59 • While single-centre cohorts and retrospective analyses have been performed, the optimal sepsis  
6 screening tool for prognostication in low- and middle-income countries is unknown. This study  
7 60 includes two well-characterized sepsis cohorts in LMICs and a cohort in a high-resource setting  
8 for comparison.  
9 61  
10 62  
11 63 • Five sepsis screening tools (i.e., qSOFA score, SIRS score, NEWS, MEWS, and UVA score)  
12 were evaluated across three international cohorts for one-month mortality prognostication,  
13 providing comprehensive performance estimates in settings with disparate causes of sepsis.  
14 64  
15 65  
16 66 • Diagnostic testing differed at each site and mortality specifically due to sepsis could not be  
17 determined.  
18 67  
19 68 • Enrolment was by convenience sampling within the referral hospital catchment area and may not  
20 be representative of the general population within these countries.  
21 69  
22 70 • While SIRS was identified as a tool with inferior prognostic performance, sample size limitations  
23 in each of the cohorts may have led to decreased ability to identify differences between each  
24 screening tool.  
25 71  
26 72  
27 73  
28 74  
29 75  
30 76  
31 77  
32 78  
33 79  
34 80  
35 81  
36  
37  
38  
39  
40  
41  
42  
43  
44  
45  
46  
47  
48  
49  
50  
51  
52  
53  
54  
55  
56  
57  
58  
59  
60

75 **Narrative:**

76 Word count: 3,783  
77

78 **INTRODUCTION**

79 Sepsis, a syndrome resulting from a systemic dysregulated host response to an infection, is estimated to  
80 cause six million deaths per year but is likely an underestimate due to limited information from low- and  
81 middle-income countries (LMICs) where 87% of the world population live <sup>1</sup>. Despite declining age-

1  
2  
3 82 standardized incidence and mortality, sepsis remains a major cause of health loss worldwide and has an  
4  
5 83 especially high health-related burden in LMICs<sup>2</sup>.  
6

7 84  
8  
9 85 Clinical sepsis guidelines developed in the Western world may not be applicable in resource-limited settings  
10  
11 86 and moreover can lead to detrimental effects on sepsis care and management when applied in these  
12  
13 87 conditions due to decreased access to resources to manage iatrogenesis from fluid resuscitation <sup>3 4</sup>. In  
14  
15 88 contrast to the United States, pathogens that lead to directly lead to vascular injury are common causes of  
16  
17 89 acute febrile illness in Cambodia and Ghana such as dengue virus, malaria, or rickettsia and may alter  
18  
19 90 empiric treatment response <sup>5</sup>. While early recognition and treatment of sepsis is critical, most sepsis scores  
20  
21 91 or early warning systems were derived from cohorts outside of LMICs. Differences in causes of sepsis,  
22  
23 92 available treatments, and available resources for supportive care should affect management strategies but  
24  
25 93 evidence is limited and optimal clinical scores or biomarkers for sepsis identification are unknown in these  
26  
27 94 settings. Multi-site international sepsis studies are essential for evaluating current and future sepsis tools to  
28  
29 95 ensure effectiveness in resource-limited settings and across populations.  
30  
31  
32

33 96  
34  
35 97 The most validated prognostication scores, SOFA (Sequential Organ Failure Assessment) and the  
36  
37 98 APACHE IV, have been developed for prognostication but require an arterial blood gas and multiple  
38  
39 99 laboratory parameters <sup>6 7</sup> that are not widely available in low-resource settings. The qSOFA (quick SOFA)  
40  
41 100 is an abbreviated score that does not require laboratory parameters. The qSOFA is one of the most widely  
42  
43 101 adopted sepsis screening tools and has largely replaced the SIRS (Systemic Inflammatory Response  
44  
45 102 Syndrome) criteria as the standard abbreviated sepsis screening tool as part of the Sepsis-3 definition to  
46  
47 103 identify septic patients <sup>8</sup>. While the qSOFA and other sepsis screening tools (i.e., Modified Early Warning  
48  
49 104 Score [MEWS], National Early Warning Score [NEWS], and Universal Vital Assessment [UVA]) were  
50  
51 105 developed to identify sepsis, these tools can be used rapidly in the clinical setting and have been studied for  
52  
53 106 their ability to prognosticate mortality among those with suspected sepsis <sup>9</sup>. Studies have evaluated these  
54  
55 107 tools for predicting in-hospital mortality but the performance of these tools and the prevalence of 28-day  
56  
57  
58  
59  
60



1  
2  
3 108 mortality, a common metric of sepsis outcomes, have yet to be described across both high- and low-resource  
4  
5 109 settings using similar methods <sup>9-11</sup>.

6  
7 110  
8  
9 111 We evaluated the performance of sepsis screening tools across prospective multi-site international cohorts  
10  
11 112 that are part of the Austere environments Consortium for Enhanced Sepsis Outcomes (ACESO) consortium  
12  
13 113 <sup>12</sup>. In contrast to APACHE IV and SOFA, these tools can be quickly performed with limited laboratory test  
14  
15 114 results. We hypothesized that qSOFA may perform poorly in LMIC populations compared to the UVA  
16  
17 115 score due to differences in causes of sepsis. We describe the diverse clinical characteristics, the aetiologies  
18  
19 116 of suspected sepsis within these cohorts, and the performance of sepsis screening tools in current clinical  
20  
21 117 use for predicting mortality at one month post enrolment.  
22  
23

24 118  
25  
26 119 **METHODS**  
27  
28 120 From May 2014 to November 2015, 200 participants were enrolled into a prospective observational study  
29  
30 121 of sepsis at Takeo Provincial Hospital in Takeo Province Cambodia <sup>13</sup>. This study was followed by a  
31  
32 122 prospective study at Duke University Hospital in Durham, North Carolina, which enrolled 180 participants  
33  
34 123 from December 2014 to March 2016. In Kumasi, Ghana, participants were enrolled at Komfo Anokye  
35  
36 124 Teaching Hospital from July 2016 to October 2017. Study protocols were approved by the Naval Medical  
37  
38 125 Research Center (NMRC) Institutional Review Board (IRB) (Cambodia sepsis study # NMRC.2013.0019;  
39  
40 126 Ghana sepsis study # NMRC.2016.0004-GHA; Duke sepsis study Duke#PRO00054849) in compliance  
41  
42 127 with all applicable Federal regulations governing the protection of human subjects as well as host country  
43  
44 128 IRBs. The study protocol in Cambodia was approved by the Cambodian National Ethics Committee for  
45  
46 129 Health Research (NECHR). The protocol in Ghana was approved by the Committee on Human Research,  
47  
48 130 Publication and Ethics (CHRPE) at Kwame Nkrumah University of Science & Technology. All procedures  
49  
50 131 were in accordance with the ethical standards of the Helsinki Declaration of the World Medical Association.  
51  
52 132 All patients, or their legally authorized representatives, provided written informed consent.  
53  
54  
55  
56  
57  
58  
59  
60

1  
2  
3 133 Hospitalized patients  $\geq 18$  years of age whose attending physician judged them to have an active infection  
4  
5 134 were considered for inclusion for each of the three cohorts. Additional inclusion and exclusion criteria  
6  
7 135 were required in Cambodia and Ghana but not required in the United States protocol. In Cambodia and  
8  
9 136 Ghana, participants were required to meet least two clinical criteria for systemic inflammatory response  
10  
11 137 syndrome (SIRS) during screening. In Cambodia and Ghana, patients were excluded if they had known  
12  
13 138 malignancy, chronic renal/hepatic insufficiency, immunosuppressive conditions (except HIV) or systemic  
14  
15 139 steroid usage that exceeded 20mg/day to prevent confounding in future biomarker studies. Patients were  
16  
17 140 also excluded in Cambodia and Ghana if they had a history of organ transplant, hemodynamically  
18  
19 141 significant gastrointestinal bleeding, anatomic or functional asplenia, acute cardiovascular disease,  
20  
21 142 general anaesthesia, or surgery in the past week prior to enrolment, women who were pregnant, patients  
22  
23 143 who had a haemoglobin less than 7 g/dL or weighed less than 35kg. Hospital physicians who deemed  
24  
25 144 their patients too ill to participate could defer enrolment.  
26  
27  
28

29 145 Following informed consent, study team members conducted a detailed medical history, including prior  
30  
31 146 medications, and physical exam. Responses were recorded on a standardized case report form and  
32  
33 147 included demographics, medical history, physical exam findings, and admission diagnoses. Study specific  
34  
35 148 procedures conducted in Cambodia were described in detail by Rozo et al <sup>14</sup>. Similar enrolment and study  
36  
37 149 procedures were followed in Kumasi, Ghana and in Durham, North Carolina, USA. Blood was collected  
38  
39 150 at the time of enrolment, then at 6 hours later, and at 24 hours later. In Ghana and Cambodia, standardized  
40  
41 151 clinical tests included a peripheral venous blood gas with lactate, complete blood count, complete  
42  
43 152 metabolic panel, optional HIV screening with consent (Alere Determine HIV1/2, Abbott, OK, United  
44  
45 153 States), malaria rapid diagnostic tests (SD Bionline Ag. P.f./Pan, Abbott, OK, United States) and aerobic  
46  
47 154 blood cultures (one aerobic bottle, Bactec 9050, BD, NJ, United States) as part of study procedures in  
48  
49 155 Ghana and Cambodia. Microbiologic results were available if collected through routine clinical care  
50  
51 156 across cohorts. Additional molecular testing and next generation sequencing for pathogens were also  
52  
53 157 performed on blood samples in the Cambodia cohort as previously described <sup>14</sup>. Participants were  
54  
55  
56  
57  
58  
59  
60

1  
2  
3 158 followed throughout their hospitalization and a record review performed at discharge. A follow-up  
4  
5 159 interview was performed, and blood samples were collected at a 28-day follow-up visit across cohorts.  
6  
7 160 When patients could not return in person, study team members attempted to conduct an interview with  
8  
9 161 patients or a legally authorized representative by telephone. Fatal outcomes among each discharged  
10  
11 162 participant were also determined. Using clinical data from case report forms and microbiology diagnostic  
12  
13 163 information, clinical adjudication was performed by three physician reviewers (internal medicine or  
14  
15 164 infectious diseases) to determine the source of infection by anatomic location and pathogen class. This  
16  
17 165 was graded on a low, moderate, and high level of confidence by two independent reviewers and a third  
18  
19 166 reviewer served as a tiebreaker for discordant conclusions. If the third reviewer did not agree with either  
20  
21 167 adjudicator, then the decision was determined by committee. Microbiologic results presented include  
22  
23 168 those adjudicated to be clinically relevant to participant's acute illness.  
24  
25  
26 169

#### 27 28 170 *Patient and Public Involvement*

29  
30 171 Patients were not involved in recruitment, design, conduct, or dissemination plans of our research. Results  
31  
32 172 of this study were disseminated to hospital and clinical leadership at Takeo Provincial Hospital and  
33  
34 173 Komfo Anokye Teaching Hospital.  
35  
36  
37 174

38  
39 175 Summary statistics were calculated for the cohorts individually and pooled, comparing baseline  
40  
41 176 demographics (e.g., gender, age, ethnicity, selected medical comorbidities), baseline screening tool  
42  
43 177 scores, physiologic parameters, baseline clinical laboratory values using either Chi-square (categorical  
44  
45 178 values), Fishers exact (categorical values), or Mann-Whitney U tests (continuous values). Prevalence of  
46  
47 179 diagnoses were described for each cohort by organ system and pathogen type (i.e., bacterial, viral,  
48  
49 180 parasitic, or fungal aetiologies) and by anatomic site.  
50  
51 181

52  
53 182 After checking the proportional hazards assumption, Cox regression was performed with bivariable  
54  
55 183 models to evaluate increased risk of death in each cohort by baseline demographics, comorbid conditions,  
56  
57  
58  
59  
60

1  
2  
3 184 physiologic parameters, and clinical laboratory parameters. Physiologic parameters and clinical laboratory  
4  
5 185 parameters were modelled as dichotomous or ordinal parameters at clinically relevant cut offs. Screening  
6  
7 186 tools were dichotomized according to current usage, including qSOFA score  $\geq 2$  (range, 0 [best] to 3  
8  
9 187 [worst] points), SIRS score  $\geq 2$  (range, 0 [best] to 4 [worst] points), MEWS  $\geq 5$  (range, 0 [best] to 13  
10  
11 188 [worst] points), NEWS  $\geq 5$  (range, 0 [best] to 20 [worst] points), and UVA  $\geq 2$  (range, 0 [best] to 13  
12  
13 189 [worst])<sup>10</sup> and were evaluated in Cox regression models unadjusted and adjusted for age and sex for risk  
14  
15 190 of death<sup>9</sup>. Glasgow Coma Scale Score (GCS; range, 3 [worst] to 15 [best] points) of less than 15 was  
16  
17 191 used for estimation of the qSOFA score, and a GCS of  $\leq 3$  for unresponsiveness for NEWS, and GCS  
18  
19 192 score 3-15 for the “alert, verbal, pain, unresponsive” scale (AVPU; alert: GCS 13-15, voice: GCS 9-12;  
20  
21 193 pain: GCS 4-8; unresponsiveness: GCS  $\leq 3$ ) score approximation for MEWS<sup>15 16</sup>. Data was  
22  
23 194 administratively right censored past 28 days. The Harrell’s C-statistic was calculated for each screening  
24  
25 195 tool for each cohort, the cohorts combined, and Cambodia and Ghana cohorts pooled<sup>17</sup>. This statistic is a  
26  
27 196 performance analogous to area under the receiver operating characteristic curve (AUROC) but accounts  
28  
29 197 for differences over time with survival outcomes. C-statistic confidence interval estimates were evaluated  
30  
31 198 rather than a statistical test due to risk of type 1 error with that approach.<sup>18</sup> The Cox regression Wald test  
32  
33 199 p-values were calculated for each score covariate was used adjusting for baseline risk estimated by age  
34  
35 200 and sex<sup>19</sup>. P-values  $< 0.002$  were considered significant using a Bonferroni correction for multiple  
36  
37 201 comparisons. Cohort sample sizes were determined a priori through Monte Carlo simulation modelling  
38  
39 202 for prognostic biomarker identification. All statistical analyses were performed in SAS (Statistical  
40  
41 203 Analytical Software, version 9.4), R version 4.0.2<sup>20</sup> or Stata (version 15.0; StataCorp LLC, College  
42  
43 204 Station, TX, USA)<sup>21</sup>.

44  
45  
46  
47 205

## 48 49 206 RESULTS

### 50 51 207 *Summary demographics, sepsis severity, and laboratory findings*

52  
53 208 There were 567 participants across the cohorts including 187 from Kumasi, Ghana, 200 from Takeo,  
54  
55 209 Cambodia, and 180 from Durham, North Carolina, United States (**Figure 1**). The study population was

210 predominantly male (57.1% male), with more male participants enrolled in Cambodia than at other sites  
 211 (68.0% vs 55.0% in the U.S. and 52.4% in Ghana). The overall median age was 50 years (interquartile  
 212 range [IQR], 36 to 63), which was similar across cohorts (**Table 1**). Previously diagnosed comorbid  
 213 conditions were most common at the U.S. site including a history of cardiovascular (65.6%; N=118),  
 214 respiratory (42.2%; N=76), or gastrointestinal (36.7%; N=66) conditions.

**Table 1.** Baseline demographic characteristics stratified by sites.

| Variable                      | Total        | Takeo,<br>Cambodia<br>(n=200) | Durham, USA<br>(n=180) | Kumasi,<br>Ghana<br>(n=187) |
|-------------------------------|--------------|-------------------------------|------------------------|-----------------------------|
| Female gender – no. (%)       | 243 (42.9%)  | 64 (32.0%)                    | 81 (45.0%)             | 98 (52.4%)                  |
| Age – years, median (IQR)     | 50 (36 – 63) | 50 (36 – 62)                  | 52.5 (40 – 63)         | 46 (35 – 63)                |
| Medical history* – no. (%)    |              |                               |                        |                             |
| Cancer                        | 44 (9.9%)    | 0 (0.0%)                      | 44 (24.4%)             | 0 (0.0%)                    |
| Cardiovascular                | 202 (41.4%)  | 22 (18.2%)                    | 118 (65.6%)            | 62 (33.2%)                  |
| Dermatologic                  | 15 (3.1%)    | 1 (0.8%)                      | 14 (7.8%)              | 0 (0.0%)                    |
| Endocrine                     | 126 (25.8%)  | 6 (5.0%)                      | 74 (41.1%)             | 46 (24.6%)                  |
| Gastrointestinal              | 76 (15.6%)   | 4 (3.3%)                      | 66 (36.7%)             | 6 (3.2%)                    |
| Genitourinary or reproductive | 34 (7.0%)    | 1 (0.8%)                      | 33 (18.3%)             | 0 (0.0%)                    |
| HIV                           | 26 (4.7%)    | 12 (6.2%)                     | 8 (4.5%)               | 6 (3.2%)                    |
| Neurological                  | 62 (12.7%)   | 1 (0.8%)                      | 44 (24.4%)             | 17 (9.1%)                   |
| Other                         | 206 (42.2%)  | 48 (39.7%)                    | 151 (83.9%)            | 7 (3.7%)                    |
| Psychiatric                   | 143 (29.3%)  | 41 (33.9%)                    | 78 (43.3%)             | 24 (12.8%)                  |
| Renal                         | 41 (8.4%)    | 0 (0.0%)                      | 41 (22.8%)             | 0 (0.0%)                    |
| Respiratory                   | 89 (18.2%)   | 7 (5.8%)                      | 76 (42.2%)             | 6 (3.2%)                    |
| Rheumatologic                 | 29 (5.9%)    | 1 (0.8%)                      | 28 (15.6%)             | 0 (0.0%)                    |
| Surgery                       | 27 (5.5%)    | 0 (0.0%)                      | 22 (12.2%)             | 5 (2.7%)                    |
| Baseline scores – no. (%)     |              |                               |                        |                             |
| MEWS ( $\geq 4$ )             | 315 (57.8%)  | 81 (40.7%)                    | 105 (65.6%)            | 129 (69.3%)                 |
| NEWS score ( $\geq 5$ )       | 324 (61.6%)  | 90 (47.9%)                    | 98 (64.5%)             | 136 (73.1%)                 |
| qSOFA ( $\geq 2$ )            | 139 (25.4%)  | 22 (11.1%)                    | 48 (29.6%)             | 69 (37.1%)                  |
| SIRS ( $\geq 2$ )             | 447 (81.8%)  | 125 (68.3%)                   | 157 (89.2%)            | 165 (88.2%)                 |
| UVA ( $\geq 2$ )              | 199 (37.8%)  | 47 (25.8%)                    | 68 (42.8%)             | 84 (45.4%)                  |

**Table 1.** Baseline demographic characteristics stratified by sites.

| Variable                          | Total   | Takeo,<br>Cambodia<br>(n=200) | Durham, USA<br>(n=180) | Kumasi,<br>Ghana<br>(n=187) |
|-----------------------------------|---------|-------------------------------|------------------------|-----------------------------|
| Baseline scores<br>(median [IQR]) |         |                               |                        |                             |
| MEWS                              | 4 (3-6) | 3 (2-5)                       | 1 (0-4)                | 1 (1-2)                     |
| NEWS                              | 6 (3-8) | 4 (2-7)                       | 7 (3-9)                | 6 (4-8)                     |
| qSOFA                             | 1 (1-2) | 1 (0-1)                       | 1 (0-2)                | 1 (1-2)                     |
| SIRS                              | 2 (2-3) | 2 (1-3)                       | 3 (2-3)                | 3 (2-3)                     |
| UVA                               | 1 (0-3) | 1 (0-2)                       | 1 (0-4)                | 1 (0-4)                     |

215 Clinical physiologic and laboratory value abnormalities at enrolment were common with median  
 216 respiratory rate at 24 (IQR: 20 to 30), the median white blood count elevated at  $12.05 \times 10^9$  cells/L (IQR:  
 217 8.13 to  $16.6 \times 10^9$  cells/L), and median lactate elevated at 2.27 mmol/L (IQR: 1.66 to 3.09 mmol/L)  
 218 (**Supplementary Table S1**). At enrolment, the proportion of an elevated qSOFA ( $\geq 2$ ) at baseline was  
 219 highest at the Ghana site with 44.4% (N=83) of participants compared to 26.0% (N=52) in Cambodia and  
 220 22.2% (N=40) in the United States. The SIRS, MEWS, NEWS, and UVA screening tools were similarly  
 221 higher in the Ghana cohort.

### 223 *Pathogens detected*

224 The most common positive microbiologic results overall included bacteraemia (N=83), respiratory culture  
 225 growth (N=19), serum hepatitis B surface antigen (N=15), and malaria rapid diagnostic tests (N=11). A  
 226 minority (121 of 567, 21.3%) of subjects had confirmed infections with complete adjudicator agreement  
 227 using all available sources of clinical microbiologic results (with the notable addition of RNA sequencing  
 228 of samples from Cambodia<sup>14</sup>) including 90 (15.9%) bacterial, 17 viral (3.0%), 20 malarial (3.5%), and 2  
 229 (0.3%) fungal infections identified across all cohorts (**Supplementary Figure S1**).

230

1  
2  
3 231 In Cambodia, the most common bacterial infections with complete adjudicator agreement were *B.*  
4  
5 232 *pseudomallei* (N=10, with blood or respiratory culture growth), presumptive *M. tuberculosis* (N=5, with  
6  
7 233 acid fast positive smears), polymicrobial (N=5), and *O. tsutsugamushi* (N=4, determined by sequencing).  
8  
9 234 The most common causes of bacteraemia (17 total of 200 participants) were *B. pseudomallei* (N=8), *E.*  
10  
11 235 *coli* (N=3), and polymicrobial infections (N=3). Three participants had a positive malaria RDT. Fungal  
12  
13 236 infections were uncommon with 1 participant with non-albicans Candidemia and 1 with cryptococcal  
14  
15 237 meningitis. Two individuals had dengue fever (one PCR positive and one adjudicated IgM positive).  
16  
17  
18 238  
19  
20 239 In Ghana, the most common causes of bacteraemia (culture growth from 28 of 187 participants) were *E.*  
21  
22 240 *coli* (N=6), *S. aureus* (N=6), *Salmonella spp.* (N=5), and *S. pneumoniae* (N=3). Nine participants had a  
23  
24 241 positive malaria RDT and 15 had a positive hepatitis B surface antigen.  
25  
26  
27 242

28 243 In the United States, the most common causes of bacteraemia (culture growth from 19 of 180  
29  
30 244 participants) were *E.coli* (N=5), *K. pneumoniae* (N=3), polymicrobial (N=2), *Pseudomonas spp.* (N=2),  
31  
32 245 or *S. aureus* (N=2). Viral infections detected by PCR included rhinovirus (N=5), influenza A (N=4),  
33  
34 246 respiratory syncytial virus (N=4), human immunodeficiency virus (N=3), and human metapneumovirus  
35  
36 247 (N=3). There was one participant with *Aspergillus fumigatus* fungal pneumonia.  
37  
38

39 248

#### 41 249 *Diagnoses and Treatments*

42  
43 250 Across cohorts, the most common organ system sites of infection were lower respiratory tract infection  
44  
45 251 (28.7%; N=163), multifocal or generalized source of infection (including malaria) (13.6%; N=77), and  
46  
47 252 gastrointestinal (including hepatic) (12.7%; N=72) (**Figure S1a**). The most common antibiotics  
48  
49 253 administered in United States, Ghana, and Cambodia were beta-lactam antibiotics (**Supplementary**  
50  
51 254 **Figure S2**), but antibiotic regimens varied widely among sites. The most common antibiotics classes used  
52  
53 255 were other antibacterials (e.g., glycopeptide antibiotics, 58.9%), beta-lactam antibacterials, penicillins  
54  
55 256 (51.7%), and cephalosporin and carbapenem antibacterials (44.4%) in the United States, cephalosporins

1  
2  
3 257 and carbapenems (64.2%), macrolides, lincosamides and streptogramins (37.4%), and other antibacterials  
4  
5 258 (33.7%) in Ghana, and cephalosporins and carbapenems (73.0%), beta-lactam antibacterials, penicillins  
6  
7 259 (46.5%) and aminoglycoside antibacterials (39.0%) in Cambodia.  
8

9 260

### 11 261 *Survival*

13 262 Among all cohorts, 16.4% (N=93) of participants had died at one month, including 58 (31.0%) in Ghana,  
14  
15 263 22 (11.0%) in Cambodia, and 13 (7.2%) in the U.S (**Figure 1**). Among those that died within one month,  
16  
17 264 median time to death was 4 days (IQR: 1 to 11) in Ghana, 7 days (IQR: 3 to 16) in Cambodia, 10 (IQR: 5  
18  
19 265 to 19) in the U.S., and 5 days (IQR: 2 to 13) overall. Parameters to calculate the qSOFA score and 28-day  
20  
21 266 mortality were available for 96.4% participants. All screening tools were associated with an increased risk  
22  
23 267 of death (**Figure 2**) with the largest increase among those with an elevated UVA score (**Supplementary**  
24  
25 268 **Figure S3**). For individuals with a UVA  $\geq 2$  there was a 5.45 times increased risk of death (95% CI: 3.39  
26  
27 269 to 8.76; C-statistic: 0.70) and those with a qSOFA  $\geq 2$  had a 4.11 times increased risk of death (95% CI:  
28  
29 270 2.71 to 6.22; C-statistic: 0.66). Those with an elevated SIRS had a 1.81 times increased risk of death  
30  
31 271 (95% CI: 0.94 to 3.50; C-statistic:0.53). Elevated NEWS (HR: 4.03; 95% CI: 2.24 to 7.26; C-statistic:  
32  
33 272 0.66) and MEWS (HR: 2.03; 95% CI: 1.28 to 3.23; C-statistic: 0.53) had similarly increased risks (**Figure**  
34  
35 273 **3**).  
36  
37  
38  
39  
40

41 275 Accuracy in an adjusted Cox model was highest for UVA (0.73; 95% CI 0.68-0.78) followed by qSOFA  
42  
43 276 (C-statistic: 0.70; 95% CI: 0.64 to 0.75) (**Table 2**). The sensitivity for predicting death was highest with  
44  
45 277 SIRS (89%; 95% CI: 80 to 94%) but specificity was lowest (19%; 95% CI: 16 to 26%). The UVA score  
46  
47 278 had a sensitivity of 74% and specificity of 70%. The qSOFA score had the lowest sensitivity (54%; 95%  
48  
49 279 CI: 44 to 65%) but highest specificity (80%; 95% CI: 76 to 84%). We observed that the qSOFA  
50  
51 280 discrimination for mortality was moderate with a C-statistic of 0.70 adjusting for age and sex (**Figure 3**).  
52  
53 281 There was similar qSOFA accuracy in individual cohorts from the United States (C-statistic 0.71; 95%  
54  
55 282 CI: 0.54 to 0.89), Cambodia (C-statistic: 0.68; 95% CI: 0.59 to 0.77), or Ghana (C-statistic: 0.72; 95% CI:  
56  
57  
58  
59  
60



283 0.64 to 0.79) (**Figure 3**). Similarly, the UVA score had moderate accuracy with a C-statistics on 0.73  
 284 (95% CI: 0.68 to 0.78). Other screening scores had similar moderate C-statistic values. The SIRS C-  
 285 statistic was 0.60 (95% CI: 0.54 to 0.65). Among participants with a NEWS score of  $\geq 5$  (62% of the  
 286 pooled cohort), the C-statistic was 0.68 (95% CI: 0.64 to 0.73) and among those with a MEWS score of  
 287  $\geq 4$  (58% of the pooled cohort), the C-statistic was 0.63 (95% CI: 0.58 to 0.68) for death. The qSOFA and  
 288 UVA scores were significantly greater than baseline risk in Ghana in contrast to other scores or cohorts  
 289 (Table 3). The qSOFA score increased prognostication accuracy in the United States cohort with a  $p=0.02$   
 290 but this was not significant after correcting for multiple comparisons. In Cambodia, while not significant

**Table 2.** Performance characteristics of sepsis score across cohorts for predicting 28-day mortality.

| Score               | Sensitivity<br>(95% CI) | Specificity<br>(95% CI) | PPV<br>(95% CI)      | NPV<br>(95% CI)      | Unadjusted<br>Bivariate<br>Cox model<br>C-statistic<br>(95% CI) | Adjusted*<br>Cox<br>model<br>C-statistic<br>(95% CI) | p-value<br>(Wald<br>test) |
|---------------------|-------------------------|-------------------------|----------------------|----------------------|-----------------------------------------------------------------|------------------------------------------------------|---------------------------|
| Age and sex         | –                       | –                       | –                    | –                    | –                                                               | 0.59<br>(0.53,0.64)                                  |                           |
| MEWS $\geq 4^*$     | 0.73 (0.63,<br>0.82)    | 0.45 (0.40,<br>0.49)    | 0.21 (0.16,<br>0.26) | 0.89 (0.85,<br>0.93) | 0.59 (0.54,<br>0.63)                                            | 0.63<br>(0.58,0.68)                                  | <b>0.002**</b>            |
| NEWS $\geq 5^*$     | 0.86<br>(0.77,0.93)     | 0.43<br>(0.38,0.48)     | 0.25<br>(0.23,0.28)  | 0.93 (0.89,<br>0.95) | 0.65 (0.64,<br>0.67)                                            | 0.68<br>(0.64,0.73)                                  | <b>&lt;0.001**</b>        |
| qSOFA<br>$\geq 2^*$ | 0.54 (0.44,<br>0.65)    | 0.80 (0.76,<br>0.84)    | 0.35 (0.27,<br>0.44) | 0.90 (0.87,<br>0.93) | 0.66 (0.61,<br>0.71)                                            | 0.70<br>(0.64,0.75)                                  | <b>&lt;0.001**</b>        |
| SIRS $\geq 2^*$     | 0.89 (0.80,<br>0.94)    | 0.19 (0.16,<br>0.23)    | 0.17 (0.14,<br>0.21) | 0.90 (0.82,<br>0.95) | 0.53 (0.50,<br>0.57)                                            | 0.60<br>(0.54,0.65)                                  | 0.134                     |
| UVA $\geq 2^*$      | 0.74<br>(0.64,<br>0.83) | 0.70 (0.65,<br>0.74)    | 0.33 (0.27,<br>0.40) | 0.93<br>(0.90,0.95)  | 0.70 (0.65,<br>0.74)                                            | 0.73<br>(0.68,0.78)                                  | <b>&lt;0.001**</b>        |

\*Adjusted Cox model C-statistic is adjusted for age and gender. Note: p-value are from Wald test of the adjusted Cox regression model.

\*\*Significant at  $p < 0.002$

291 after correction, NEWS ( $p=0.01$ ) and UVA ( $p=0.01$ ) scores increased accuracy greater than baseline risk.  
 292 When pooling LMIC cohorts (i.e., Ghana and Cambodia), after adjustment for age and sex, the qSOFA  
 293 (C-statistic: 0.71; 95% CI: 0.66 to 0.77) and UVA scores (C-statistic: 0.76; 95% CI: 0.71 to 0.81) had

**Table 3.** Performance characteristics of sepsis score across cohorts for predicting 28-day mortality stratified by site.

| Model              | Takeo, Cambodia      |         | Durham, USA          |         | Kumasi, Ghana        |                 |
|--------------------|----------------------|---------|----------------------|---------|----------------------|-----------------|
|                    | C-statistic (95% CI) | p-value | C-statistic (95% CI) | p-value | C-statistic (95% CI) | p-value         |
| <b>Age and Sex</b> | 0.68 (0.59, 0.78)    | –       | 0.68 (0.54,0.81)     | –       | 0.57 (0.49, 0.64)    | –               |
| <b>MEWS</b>        | 0.68 (0.59, 0.78)    | 0.2102  | 0.68 (0.57, 0.79)    | 0.4991  | 0.63 (0.56, 0.70)    | 0.0097          |
| <b>NEWS</b>        | 0.73 (0.63, 0.83)    | 0.0106  | 0.71 (0.59, 0.84)    | 0.2557  | 0.64 (0.57, 0.70)    | 0.0022          |
| <b>qSOFA</b>       | 0.68 (0.59, 0.77)    | 0.5101  | 0.71 (0.54, 0.89)    | 0.0365  | 0.72 (0.64, 0.79)    | < <b>0.001*</b> |
| <b>SIRS</b>        | 0.69 (0.60, 0.78)    | 0.5020  | 0.69 (0.55, 0.83)    | 0.5831  | 0.58 (0.51, 0.65)    | 0.1882          |
| <b>UVA</b>         | 0.71 (0.60, 0.83)    | 0.0109  | 0.70 (0.55, 0.85)    | 0.4753  | 0.77 (0.71,0.83)     | < <b>0.001*</b> |

Note: p-value are from Wald test of the adjusted Cox regression model. Each model is adjusted for age and sex. \*Significant at p<0.002

294 higher accuracy compared with MEWS (C-statistic: 0.66 (95% CI 0.61 to 0.72), NEWS (C-statistic: 0.70  
 295 (95% CI: 0.65 to 0.76), and SIRS (C-statistic: 0.61; 95% CI: 0.55 to 0.67). In contrast, in the United  
 296 States cohort, NEWS, MEWS, SIRS, qSOFA, and UVA scores after age and sex adjustment each had  
 297 similar accuracy with C-statistics ranging from 0.66 to 0.71 (**Table 3 and Supplementary Table S3**).

## 299 DISCUSSION

300 In pooled prospective international cohorts in Cambodia, Ghana, and the United States, the UVA score  
 301 and Sepsis-3 (qSOFA) performed well with a C-statistic around 0.7 for predicting 28-day mortality.  
 302 However, this improvement was largely identified in the cohort in Ghana and the accuracy was no  
 303 different than baseline risk in the Cambodia cohort. There was a trend towards improving prognostication  
 304 accuracy with the NEWS and UVA score in Cambodia and only with the qSOFA score in the United  
 305 States. These results suggest that widely used sepsis screening tools may have varying performance for  
 306 prognostication in diverse settings with different treatment regimens and aetiologies of sepsis. Therefore,  
 307 screening tools should be selected after validation within populations prior to widespread adoption.

309 Current sepsis screening tools have had variable performance when applied for prognostication. SOFA or  
 310 APACHE scores have been developed specifically for prognostication but required parameters including

1  
2  
3 311 arterial blood oxygen saturation are often not available<sup>9</sup>. Performance of qSOFA and SIRS for mortality  
4  
5 312 have performed poorly (SIRS, area under the receiving operator curve [AUROC], 0.61; qSOFA:  
6  
7 313 AUROC, 0.61) for prognostication in high-resource settings intensive care unit (ICU) settings<sup>11</sup> and in  
8  
9 314 diverse LMICs (adjusted SIRS: AUROC, 0.59; adjusted qSOFA: AUROC, 0.70)<sup>9</sup> in prior studies for  
10  
11 315 mortality prognostication. While qSOFA is generally more specific than other screening tools, it is less  
12  
13 316 sensitive than SIRS, MEWS, and NEWS, which is consistent with our data<sup>22</sup>. When applied to sepsis  
14  
15 317 identification, Surviving Sepsis 2021 guidelines recommend against solely using qSOFA,<sup>23</sup> due to being  
16  
17 318 a more specific rather than sensitive screening test. Additionally, qSOFA has been found to be inferior to  
18  
19 319 MEWS, and NEWS but more accurate and specific than SIRS for predicting in-hospital mortality and  
20  
21 320 ICU transfer in a large retrospective cohort of over 30 thousand patients in the United States (NEWS:  
22  
23 321 AUROC, 0.77; MEWS: AUROC, 0.73; qSOFA: AUROC, 0.69; SIRS: AUROC, 0.65)<sup>22</sup>. Different  
24  
25 322 screening scores have been evaluated in prospective cohorts in sub-Saharan Africa (sSA) previously in  
26  
27 323 Tanzania (qSOFA: AUROC, 0.57; MEWS: AUROC, 0.49)<sup>24</sup> and Rwanda<sup>25</sup> (MEWS: AUROC, 0.69;  
28  
29 324 UVA: AUROC, 0.71; qSOFA: AUROC, 0.65) and in Gabon<sup>26</sup> (UVA: AUROC, 0.90; qSOFA: AUROC,  
30  
31 325 0.77; MEWS: AUROC, 0.72; SIRS: AUROC, 0.70). Given the performance variability that has been  
32  
33 326 previously observed and was observed in this study, it is prudent to evaluate prediction scores within the  
34  
35 327 populations they serve prior to widespread promotion.  
36  
37  
38  
39  
40

41 329 The UVA score performed better than baseline risk in the Ghana cohort. Our results externally validated  
42  
43 330 the UVA score for use prognostication of hospitalized patients with suspected sepsis in Kumasi, Ghana  
44  
45 331 and potentially in the region when demographics are similar. The superiority of the UVA score in the  
46  
47 332 Ghana cohort could be related to similarities in infectious causes of illness with other countries in sub-  
48  
49 333 Saharan Africa (sSA) populations from which the UVA score was derived<sup>27</sup>. In contrast to the score  
50  
51 334 derivation study<sup>27</sup>, UVA score performed similarly to qSOFA in Ghana. The accuracy of the UVA scores  
52  
53 335 was not greater than baseline risk in the cohort in Cambodia after adjustment for multiple comparisons.  
54  
55 336 While conclusions may be limited by sample size, sepsis scores derived from the regions of the world  
56  
57  
58  
59  
60

1  
2  
3 337 with more similar infectious aetiologies may perform better. Our results highlight the importance of  
4  
5 338 validating scores in new patient populations prior to widespread use.  
6

7 339  
8  
9 340 This study had multiple limitations. First, exclusion criteria of immunocompromising conditions except  
10  
11 341 HIV may have led to a skewed populations from Ghana and Cambodia. These exclusion criteria were  
12  
13 342 created to decrease the effect of comorbid conditions or medications on immune biomarkers. However, in  
14  
15 343 Cambodia and Ghana, immunosuppressive medications or diagnoses of chronic liver or kidney disease  
16  
17 344 may be less common in the general population due to limited access to specialists or specialized  
18  
19 345 medications. Additionally, while there were differences in the baseline severity between cohorts, study  
20  
21 346 processes including inclusion criteria were largely standardized across sites improving the comparability  
22  
23 347 of the cohorts in diverse settings. Diagnostic testing differed at each site and mortality specifically due to  
24  
25 348 sepsis could not be determined. Enrolment was by convenience sampling within the referral hospital  
26  
27 349 catchment area and may not be representative of the general population within these countries.  
28  
29

30 350 Approximation of the mental status for the MEWS scoring using GCS may not be generalizable to the use  
31  
32 351 of GCS at other sites. However, similar MEWS and NEWS performance was observed across sites.  
33  
34 352 Lastly, due to the limited sample size in each of the cohorts, smaller improvements in accuracy may not  
35  
36 353 have been identified in the Cambodia and United States cohorts that had less deaths compared to the  
37  
38 354 Ghana cohort.  
39

40 355  
41  
42  
43 356 Inexpensive and readily available tools are needed for triage in resource-limited areas in the world to help  
44  
45 357 identify patients that need escalation and possible transfer to higher levels of care. Current widely used  
46  
47 358 sepsis screening tools represent a clinical benchmark for the development of future triage tools. Research  
48  
49 359 is ongoing to assess point-of-care diagnostics within our sepsis cohort research network. Assays with  
50  
51 360 portable and low-cost inflammation biomarkers tests, molecular diagnostics, or point-of-care ultrasound  
52  
53 361 (POCUS) have the potential to augment the performance of clinical screening tools towards a more  
54  
55 362 personalized approach to sepsis recognition and triage.  
56  
57  
58  
59  
60

363

364 CONCLUSION

365 Sepsis screening tools that are widely used during clinical care had sub-optimal performance for risk

366 stratification in three international cohorts with increased performance of the UVA and qSOFA scores in

367 Ghana compared to baseline risk. There remains a need for reliable, low-cost, and scalable

368 prognostication methods that are validated in diverse settings.

369

370 **Funding:** Defense Threat Reduction Agency (JSTO-CBA) to Naval Medical Research Center (NMRC)

371 (HDTRA1516108), Defense Health Bureau of Medicine &amp; Surgery to NMRC for Combating Antibiotic

372 Resistance Bacteria (FY1819 0130.1832), Naval Medical Logistics Command Cooperative Agreement

373 (N626451920001).

374 **Conflicts of Interest:** ELT has held equity and consulted for Predigen and Biomeme, and he is an employee

375 of Danaher Diagnostics.

376 **Disclaimer:**

377

378 K.L.S. is an employee of the US government, and C.B, N.A., C.D., M.P., and A.L. are military service

379 members. This work was prepared as a part of official duties. Title 17 U.S.C. 105 provides that

380 'Copyright protection under this title is not available for any work of the United States Government.'

381 Title 17 U.S.C. 101 defines a U.S. Government work as a work prepared by a military service member or

382 employee of the U.S. Government as part of a person's official duties. The views expressed reflect the

383 results of research conducted by the authors and do not necessarily reflect the official policy or position of

384 the Department of the Navy, Department of Defense, nor the United States Government.

385 **Contributorship Statement:** PWB, RM, JB, LM, DAS, REM performed data curation and analyses. PWB,

386 KS, and DVC developed the manuscript concept. DVC and KS provided resources for research

387 development. AL, KLS, CO, JC, TS, ERK, ELT, CB, CWW, AF, AL, DF, JVL, MP, MR, NA, CD, MGG,

1  
2  
3 388 TV, AO, DA, and GO were involved in protocol development and data generation. LM, MS, WH, SK, were  
4  
5 389 involved in research operations. AL, KLS, CWW, DF, ELT, CB, DVC, and PWB were involved in  
6  
7 390 manuscript revisions. All authors reviewed and approved of this manuscript.  
8  
9

10 391 **Data sharing statement:** De-identified data may be made available upon reasonable request to the  
11  
12 392 corresponding author.  
13

14 393

## 15 394 **References**

- 16  
17  
18 395 1. Reinhart K, Daniels R, Kissoon N, et al. Recognizing Sepsis as a Global Health Priority - A WHO  
19  
20  
21 396 Resolution. *The New England journal of medicine* 2017;377(5):414-17. doi:  
22  
23 397 10.1056/NEJMp1707170 [published Online First: 2017/06/29]  
24  
25 398 2. Rudd KE, Johnson SC, Agesa KM, et al. Global, regional, and national sepsis incidence and mortality,  
26  
27 399 1990-2017: analysis for the Global Burden of Disease Study. *Lancet (London, England)*  
28  
29 400 2020;395(10219):200-11. doi: 10.1016/s0140-6736(19)32989-7 [published Online First:  
30  
31 401 2020/01/20]  
32  
33 402 3. Maitland K, Kiguli S, Opoka RO, et al. Mortality after fluid bolus in African children with severe  
34  
35 403 infection. *The New England journal of medicine* 2011;364(26):2483-95. doi:  
36  
37 404 10.1056/NEJMoa1101549 [published Online First: 2011/05/28]  
38  
39 405 4. Andrews B, Semler MW, Muchemwa L, et al. Effect of an Early Resuscitation Protocol on In-hospital  
40  
41 406 Mortality Among Adults With Sepsis and Hypotension: A Randomized Clinical Trial. *Jama*  
42  
43 407 2017;318(13):1233-40. doi: 10.1001/jama.2017.10913 [published Online First: 2017/10/04]  
44  
45 408 5. WHO. Dengue: Guidelines for Diagnosis, Treatment, Prevention and Control: New Edition.  
46  
47 409 Geneva2009.  
48  
49 50 410 6. Singer M, Deutschman CS, Seymour CW, et al. The Third International Consensus Definitions for  
51  
52 411 Sepsis and Septic Shock (Sepsis-3). *JAMA* 2016;315(8):801-10. doi: 10.1001/jama.2016.0287  
53  
54  
55  
56  
57  
58  
59  
60

- 1  
2  
3 412 7. Zimmerman JE, Kramer AA, McNair DS, et al. Acute Physiology and Chronic Health Evaluation  
4  
5 413 (APACHE) IV: hospital mortality assessment for today's critically ill patients. *Critical care*  
6  
7 414 *medicine* 2006;34(5):1297-310. doi: 10.1097/01.Ccm.0000215112.84523.F0 [published Online  
8  
9 415 First: 2006/03/17]
- 11 416 8. Singer M, Deutschman CS, Seymour CW, et al. The Third International Consensus Definitions for  
12  
13 417 Sepsis and Septic Shock (Sepsis-3). *Jama* 2016;315(8):801-10. doi: 10.1001/jama.2016.0287  
14  
15 418 [published Online First: 2016/02/24]
- 17 419 9. Rudd KE, Seymour CW, Aluisio AR, et al. Association of the Quick Sequential (Sepsis-Related)  
18  
19 420 Organ Failure Assessment (qSOFA) Score With Excess Hospital Mortality in Adults With  
20  
21 421 Suspected Infection in Low- and Middle-Income Countries. *Jama* 2018;319(21):2202-11. doi:  
22  
23 422 10.1001/jama.2018.6229 [published Online First: 2018/05/26]
- 25 423 10. Adegbite BR, Edoa JR, Ndzebe Ndoumba WF, et al. A comparison of different scores for diagnosis  
26  
27 424 and mortality prediction of adults with sepsis in Low-and-Middle-Income Countries: a systematic  
28  
29 425 review and meta-analysis. *EClinicalMedicine* 2021;42:101184. doi:  
30  
31 426 10.1016/j.eclinm.2021.101184 [published Online First: 2021/11/13]
- 33 427 11. Raith EP, Udy AA, Bailey M, et al. Prognostic Accuracy of the SOFA Score, SIRS Criteria, and  
34  
35 428 qSOFA Score for In-Hospital Mortality Among Adults With Suspected Infection Admitted to the  
36  
37 429 Intensive Care Unit. *Jama* 2017;317(3):290-300. doi: 10.1001/jama.2016.20328 [published  
38  
39 430 Online First: 2017/01/24]
- 41 431 12. Krishnan S, Beckett C, Espinosa B, et al. Austere environments Consortium for Enhanced Sepsis  
42  
43 432 Outcomes (ACESO). *Shock (Augusta, Ga)* 2020;53(3):377-78. doi:  
44  
45 433 10.1097/shk.0000000000001450 [published Online First: 2019/10/01]
- 47 434 13. Schully KL, Berjohn CM, Prouty AM, et al. Melioidosis in lower provincial Cambodia: A case series  
48  
49 435 from a prospective study of sepsis in Takeo Province. *PLoS neglected tropical diseases*  
50  
51 436 2017;11(9):e0005923. doi: 10.1371/journal.pntd.0005923  
52  
53  
54  
55  
56  
57  
58  
59

- 1  
2  
3 437 14. Rozo M, Schully KL, Philipson C, et al. An Observational Study of Sepsis in Takeo Province  
4  
5 438 Cambodia: An in-depth examination of pathogens causing severe infections. *PLoS Negl Trop Dis*  
6  
7 439 2020;14(8):e0008381. doi: 10.1371/journal.pntd.0008381 [published Online First: 2020/08/18]  
8  
9 440 15. Kelly CA, Upex A, Bateman DN. Comparison of consciousness level assessment in the poisoned  
10  
11 441 patient using the alert/verbal/painful/unresponsive scale and the Glasgow Coma Scale. *Ann*  
12  
13 442 *Emerg Med* 2004;44(2):108-13. doi: 10.1016/j.annemergmed.2004.03.028 [published Online  
14  
15 443 First: 2004/07/28]  
16  
17 444 16. Nedeia D. AVPU Scale: MDApp; [Available from: <https://www.mdapp.co/avpu-scale-calculator-163/>  
18  
19 445 accessed 18 January, 2022.  
20  
21 446 17. Harrell FE, Jr, Califf RM, Pryor DB, et al. Evaluating the Yield of Medical Tests. *JAMA*  
22  
23 447 1982;247(18):2543-46. doi: 10.1001/jama.1982.03320430047030  
24  
25 448 18. Han X, Zhang Y, Shao Y. On comparing 2 correlated C indices with censored survival data. *Stat Med*  
26  
27 449 2017;36(25):4041-49. doi: 10.1002/sim.7414 [published Online First: 2017/08/02]  
28  
29 450 19. Pepe MS, Kerr KF, Longton G, et al. Testing for improvement in prediction model performance. *Stat*  
30  
31 451 *Med* 2013;32(9):1467-82. doi: 10.1002/sim.5727 [published Online First: 2013/01/09]  
32  
33 452 20. Team TRDC. R: A language environment for statistical computing. R Foundation for Statistical  
34  
35 453 Computing. 2020  
36  
37 454 21. StataCorp L. Stata statistical software: release 16 College Station. *TX StataCorp LP* 2019  
38  
39 455 22. Churpek MM, Snyder A, Han X, et al. Quick Sepsis-related Organ Failure Assessment, Systemic  
40  
41 456 Inflammatory Response Syndrome, and Early Warning Scores for Detecting Clinical  
42  
43 457 Deterioration in Infected Patients outside the Intensive Care Unit. *Am J Respir Crit Care Med*  
44  
45 458 2017;195(7):906-11. doi: 10.1164/rccm.201604-0854OC [published Online First: 2016/09/21]  
46  
47 459 23. Evans L, Rhodes A, Alhazzani W, et al. Surviving sepsis campaign: international guidelines for  
48  
49 460 management of sepsis and septic shock 2021. *Intensive care medicine* 2021;47(11):1181-247.  
50  
51  
52  
53  
54  
55  
56  
57  
58  
59  
60



- 1  
2  
3 461 24. Carugati M, Zhang HL, Kilonzo KG, et al. Predicting Mortality for Adolescent and Adult Patients  
4  
5 462 with Fever in Resource-Limited Settings. *Am J Trop Med Hyg* 2018;99(5):1246-54. doi:  
6  
7 463 10.4269/ajtmh.17-0682 [published Online First: 2018/09/19]  
8  
9 464 25. Klinger A, Mueller A, Sutherland T, et al. Predicting mortality in adults with suspected infection in a  
10  
11 465 Rwandan hospital: an evaluation of the adapted MEWS, qSOFA and UVA scores. *BMJ Open*  
12  
13 466 2021;11(2):e040361. doi: 10.1136/bmjopen-2020-040361 [published Online First: 2021/02/12]  
14  
15 467 26. Schmedding M, Adegbite BR, Gould S, et al. A Prospective Comparison of Quick Sequential Organ  
16  
17 468 Failure Assessment, Systemic Inflammatory Response Syndrome Criteria, Universal Vital  
18  
19 469 Assessment, and Modified Early Warning Score to Predict Mortality in Patients with Suspected  
20  
21 470 Infection in Gabon. *Am J Trop Med Hyg* 2019;100(1):202-08. doi: 10.4269/ajtmh.18-0577  
22  
23 471 [published Online First: 2018/11/28]  
24  
25 472 27. Moore CC, Hazard R, Saulters KJ, et al. Derivation and validation of a universal vital assessment  
26  
27 473 (UVA) score: a tool for predicting mortality in adult hospitalised patients in sub-Saharan Africa.  
28  
29 474 *BMJ global health* 2017;2(2):e000344. doi: 10.1136/bmjgh-2017-000344 [published Online First:  
30  
31 475 2017/10/31]  
32  
33  
34  
35  
36  
37  
38  
39  
40  
41  
42  
43  
44  
45  
46  
47  
48  
49  
50  
51  
52  
53  
54  
55  
56  
57  
58  
59  
60

1  
2  
3 **478 Figure Legends**

4 479 Figure 1. Enrolment flow diagram across cohorts.

5 480 Figure 2. Kaplan-Meier survival plot of 28-day mortality stratified by site.

6 481 Figure 3. The C-statistic by score overall and by cohort (adjusted for age and sex).

7 482

8 483

9  
10  
11  
12  
13  
14  
15  
16  
17  
18  
19  
20  
21  
22  
23  
24  
25  
26  
27  
28  
29  
30  
31  
32  
33  
34  
35  
36  
37  
38  
39  
40  
41  
42  
43  
44  
45  
46  
47  
48  
49  
50  
51  
52  
53  
54  
55  
56  
57  
58  
59  
60

For peer review only

1  
2  
3  
4  
5  
6  
7  
8  
9  
10  
11  
12  
13  
14  
15  
16  
17  
18  
19  
20  
21  
22  
23  
24  
25  
26  
27  
28  
29  
30  
31  
32  
33  
34  
35  
36  
37  
38  
39  
40  
41

### Kumasi, Ghana

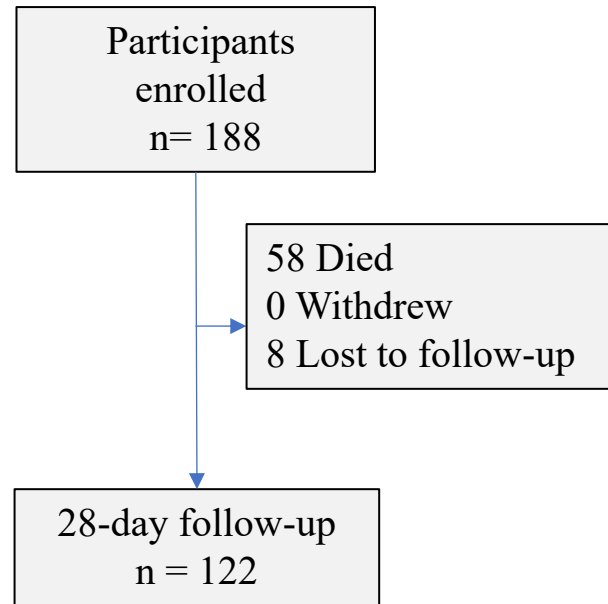

### Durham, United States

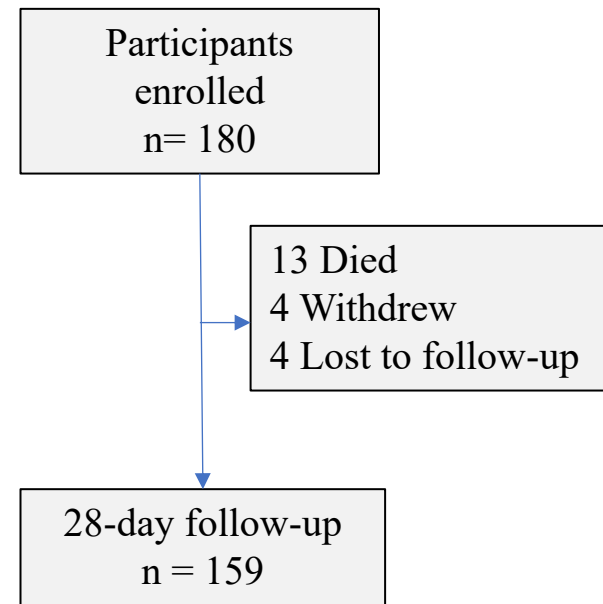

### Takeo, Cambodia

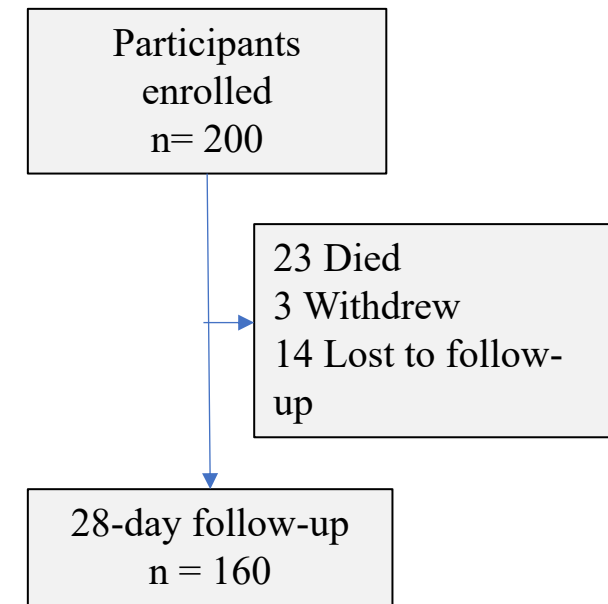

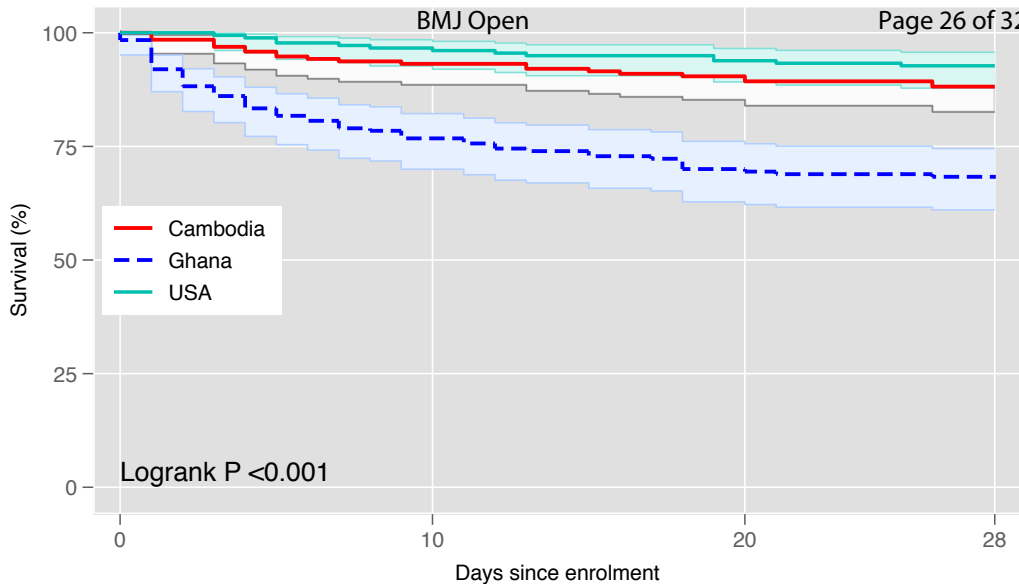

No. at Risk:

|          |     |      |     |      |     |     |     |
|----------|-----|------|-----|------|-----|-----|-----|
| Cambodia | 200 | (13) | 171 | (5)  | 164 | (4) | 148 |
| Ghana    | 187 | (43) | 137 | (12) | 124 | (3) | 118 |
| USA      | 180 | (6)  | 173 | (5)  | 168 | (2) | 166 |

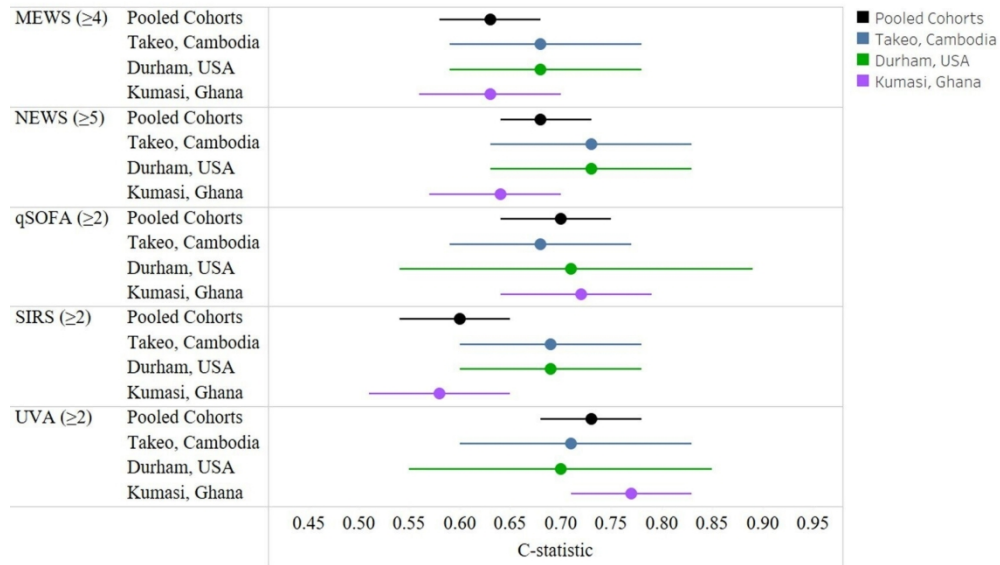

Figure 3. The C-statistic by score overall and by cohort (adjusted for age and sex).

165x96mm (600 x 600 DPI)

**Table S1.** Baseline physiologic and clinical laboratory parameters by site at enrollment.

| <b>Parameter</b>                             | <b>Total<br/>Median (IQR)</b> | <b>Takeo, Cambodia<br/>Median (IQR)</b> | <b>Durham, USA<br/>Median (IQR)</b> | <b>Kumasi, Ghana<br/>Median (IQR)</b> |
|----------------------------------------------|-------------------------------|-----------------------------------------|-------------------------------------|---------------------------------------|
| <b>Physiologic parameters</b>                |                               |                                         |                                     |                                       |
| Respiratory rate (breaths per minute)        | 24 (20, 30)                   | 24 (20, 28)                             | 24 (20, 31)                         | 26 (22, 30)                           |
| Systolic blood pressure (mmHg)               | 120 (100, 130)                | 110 (100, 130)                          | 113 (96, 129)                       | 127.5 (110, 140)                      |
| Diastolic blood pressure (mmHg)              | 70 (60, 80)                   | 70 (70, 80)                             | 64 (56, 75)                         | 80 (60, 90)                           |
| Oxygen saturation (%)                        | 97 (94, 98)                   | 98 (96, 98)                             | 95 (92, 97.5)                       | 97 (95, 98)                           |
| Temperature (°C)                             | 37.9 (37, 38.7)               | 37.5 (37, 38.5)                         | 38.1 (36.9, 38.89)                  | 38.2 (37.4, 38.8)                     |
| Heart rate (beats per minute)                | 105 (94, 118)                 | 96 (86.5, 105.5)                        | 111 (99.5, 124)                     | 111 (99, 118)                         |
| <b>Clinical laboratory parameters</b>        |                               |                                         |                                     |                                       |
| White blood cells (x10 <sup>9</sup> cells/L) | 12.05 (8.13, 16.6)            | 11.9 (8.2, 16.6)                        | 13.35 (9.7, 17.6)                   | 10.76 (7.68, 15.41)                   |
| Platelets (x10 <sup>9</sup> cells/L)         | 222 (152.5, 321.5)            | 262 (169, 366)                          | 236.5 (160, 291)                    | 193 (137, 284)                        |
| Sodium (mEq/L)                               | 135 (132, 138)                | 135 (131, 138)                          | 137 (134, 139)                      | 134 (130, 138)                        |
| Potassium (mEq/L)                            | 3.7 (3.3, 4.2)                | 3.7 (3.2, 4.1)                          | 3.9 (3.5, 4.3)                      | 3.6 (3.2, 4)                          |
| Sodium Bicarbonate (mmol/L)                  | 24 (21, 26)                   | 24 (22, 27)                             | 25 (22, 27)                         | 22 (19, 25)                           |
| Glucose (mg/dL)                              | 6.56 (5.4, 10)                | 6.44 (5.39, 8.28)                       | 6.69 (5.67, 10.06)                  | 6.65 (5.2, 12)                        |
| Blood Urea Nitrogen (mg/dL)                  | 5 (3.57, 7.9)                 | 4.29 (3.21, 5.71)                       | 5.71 (3.57, 10)                     | 5.4 (3.5, 9.4)                        |
| Creatinine (mg/dL)                           | 88.42 (66, 130)               | 79.58 (53.05, 88.42)                    | 106.1 (70.74, 150.31)               | 91 (70, 135)                          |
| Alkaline Phosphatase (U/L)                   | 86.5 (65, 132)                | 98.5 (72, 172)                          | 80 (63, 106)                        | 85 (63, 125)                          |
| Alanine Transaminase (U/L)                   | 32 (22, 58)                   | 46 (27, 86)                             | 22 (18, 40)                         | 29 (22, 48)                           |
| Aspartate Aminotransferase (U/L)             | 42 (27, 76)                   | 61 (38, 117)                            | 29 (21, 45)                         | 35.5 (25, 65)                         |
| Bilirubin (mg/dL)                            | 15 (10.26, 21)                | 13.68 (10.26, 20.52)                    | 15.39 (10.26, 20.52)                | 15 (11, 23)                           |

1  
2  
3  
4  
5  
6  
7  
8  
9  
10  
11  
12  
13  
14  
15  
16  
17  
18  
19  
20  
21  
22  
23  
24  
25  
26  
27  
28  
29  
30  
31  
32  
33  
34  
35  
36  
37  
38  
39  
40  
41  
42  
43  
44  
45  
46  
47  
48  
49  
50  
51  
52  
53  
54  
55  
56  
57  
58  
59  
60

---

| <b>Parameter</b>     | <b>Total<br/>Median (IQR)</b> | <b>Takeo, Cambodia<br/>Median (IQR)</b> | <b>Durham, USA<br/>Median (IQR)</b> | <b>Kumasi, Ghana<br/>Median (IQR)</b> |
|----------------------|-------------------------------|-----------------------------------------|-------------------------------------|---------------------------------------|
| Albumin (g/dL)       | 3.0 (2.5, 3.5)                | 2.9 (2.5, 3.4)                          | 3.0 (2.5, 3.5)                      | 3.0 (2.3, 3.6)                        |
| Total protein (g/dL) | 73 (65, 79)                   | 74 (68, 79.5)                           | 67 (57, 72)                         | 75 (69, 83)                           |
| Lactate (mmol/L)     | 2.27 (1.66, 3.09)             | 2.33 (1.79, 3.03)                       | 1.5 (1, 2.4)                        | 2.54 (1.8, 3.42)                      |

---

*\*All variables are presented as median, interquartile range*

For peer review only

**Table S2.** Performance characteristics of sepsis score across Cambodia and Ghana sites combined for predicting 28-day mortality.

| Score                            | Sensitivity<br>(95% CI) | Specificity<br>(95% CI) | PPV<br>(95%<br>CI) | NPV<br>(95%<br>CI) | Unadjusted<br>Bivariate<br>Cox model<br>C-statistic<br>(95% CI) | Adjusted*<br>Cox model<br>C-statistic<br>(95% CI) | p-value          |
|----------------------------------|-------------------------|-------------------------|--------------------|--------------------|-----------------------------------------------------------------|---------------------------------------------------|------------------|
| <b>Baseline</b>                  |                         |                         |                    |                    |                                                                 | 0.60 (0.54 – 0.66)                                |                  |
| <b>MEWS <math>\geq 4</math></b>  | 0.74 (0.64 – 0.84)      | 0.50 (0.44–0.56)        | 0.28 (0.25 – 0.32) | 0.88 (0.84 – 0.92) | 0.62 (0.57 – 0.66)                                              | 0.66 (0.61 – 0.72)                                | <b>&lt;0.001</b> |
| <b>NEWS <math>\geq 5</math></b>  | 0.85 (0.75–0.92)        | 0.46 (0.38–0.52)        | 0.33 (0.29–0.36)   | 0.91 (0.85 – 0.94) | 0.65 (0.62 – 0.70)                                              | 0.70 (0.65 – 0.76)                                | <b>0.001</b>     |
| <b>qSOFA <math>\geq 2</math></b> | 0.54 (0.42 – 0.65)      | 0.84 (0.80 – 0.88)      | 0.47 (0.39 – 0.55) | 0.87 (0.84 – 0.90) | 0.67 (0.62 – 0.73)                                              | 0.71 (0.66–0.77)                                  | <b>&lt;0.001</b> |
| <b>SIRS <math>\geq 2</math></b>  | 0.88 (0.78 – 0.94)      | 0.24 (0.19 (0.30)       | 0.23 (0.21 – 0.24) | 0.89 (0.81 – 0.94) | 0.55 (0.51 – 0.59)                                              | 0.61 (0.55 – 0.67)                                | 0.066            |
| <b>UVA <math>\geq 2</math></b>   | 0.75 (0.65 – 0.84)      | 0.74 (0.70 – 0.80)      | 0.45 (0.40 – 0.52) | 0.92 (0.88 – 0.94) | 0.73 (0.68 – 0.77)                                              | 0.76 (0.71–0.81)                                  | <b>&lt;0.001</b> |



**Table S3.** Performance characteristics of sepsis score across the United States site for predicting 28-day mortality.

| Score                               | Sensitivity<br>(95% CI) | Specificity<br>(95% CI) | PPV<br>(95% CI)       | NPV<br>(95% CI)      | Unadjusted<br>Bivariate<br>Cox model<br>C-statistic<br>(95% CI) | Adjusted*<br>Cox model<br>C-statistic<br>(95% CI) | p-value |
|-------------------------------------|-------------------------|-------------------------|-----------------------|----------------------|-----------------------------------------------------------------|---------------------------------------------------|---------|
| <b>Baseline<br/>(age +sex)</b>      |                         |                         |                       |                      |                                                                 | 0.61 (0.52 –<br>0.66)                             |         |
| <b>MEWS<math>\geq</math>4</b>       | 0.60 (0.26-<br>0.87)    | 0.33 (0.26<br>–0.41)    | 0.05 (0.03<br>–0.09)  | 0.92 (0.85<br>–0.96) | 0.53 (0.38 –<br>0.67)                                           | 0.68 (0.57 –<br>0.79)                             | 0.743   |
| <b>NEWS<math>\geq</math>5</b>       | 0.90 (0.56 –<br>0.99)   | 0.37 (0.29<br>–0.45)    | 0.09 (0.07<br>–0.11)  | 0.98 (0.89-<br>0.99) | 0.63 (0.54 -<br>0.71)                                           | 0.71 (0.59-<br>0.84)                              | 0.256   |
| <b>qSOFA<br/><math>\geq</math>2</b> | 0.60 (0.26 -<br>87)     | 0.72 (0.65<br>–0.79)    | 0.13 (0.08<br>- 0.20) | 0.96 (0.93<br>–0.98) | 0.66 (0.51 –<br>0.81)                                           | 0.71 (0.54 –<br>0.89)                             | 0.019   |
| <b>SIRS <math>\geq</math>2</b>      | 0.92 (0.64 -<br>0.99)   | 0.11 (0.07<br>–0.16)    | 0.08 (0.07<br>–0.09)  | 0.94 (0.72<br>–0.99) | 0.51 (0.45 –<br>0.58)                                           | 0.66 (0.54 –<br>0.82)                             | 0.694   |
| <b>UVA<math>\geq</math>2</b>        | 0.60 (0.26 –<br>0.88)   | 0.58 (0.50<br>–0.66)    | 0.09 (0.05<br>-0.14)  | 0.95 (0.90<br>-0.98) | 0.59 (0.44 –<br>0.73)                                           | 0.70 (0.50 –<br>0.87)                             | 0.281   |

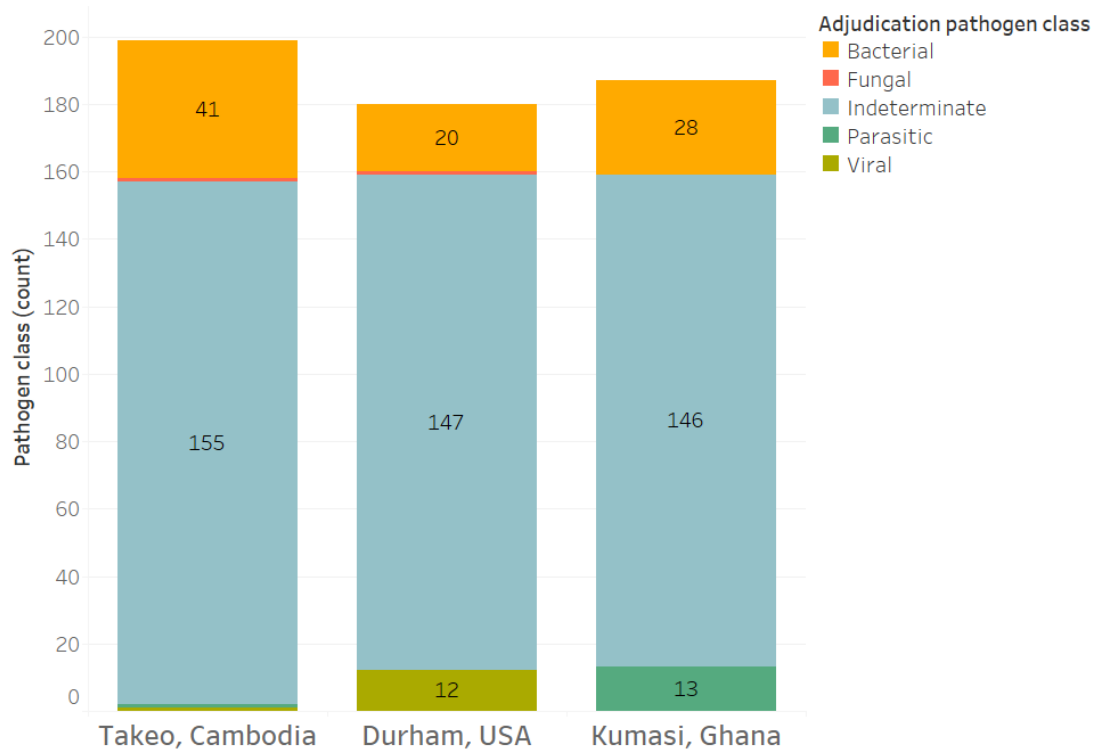

**Supplementary Figure S1.** Distribution of adjudicated pathogen class for each site.

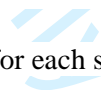

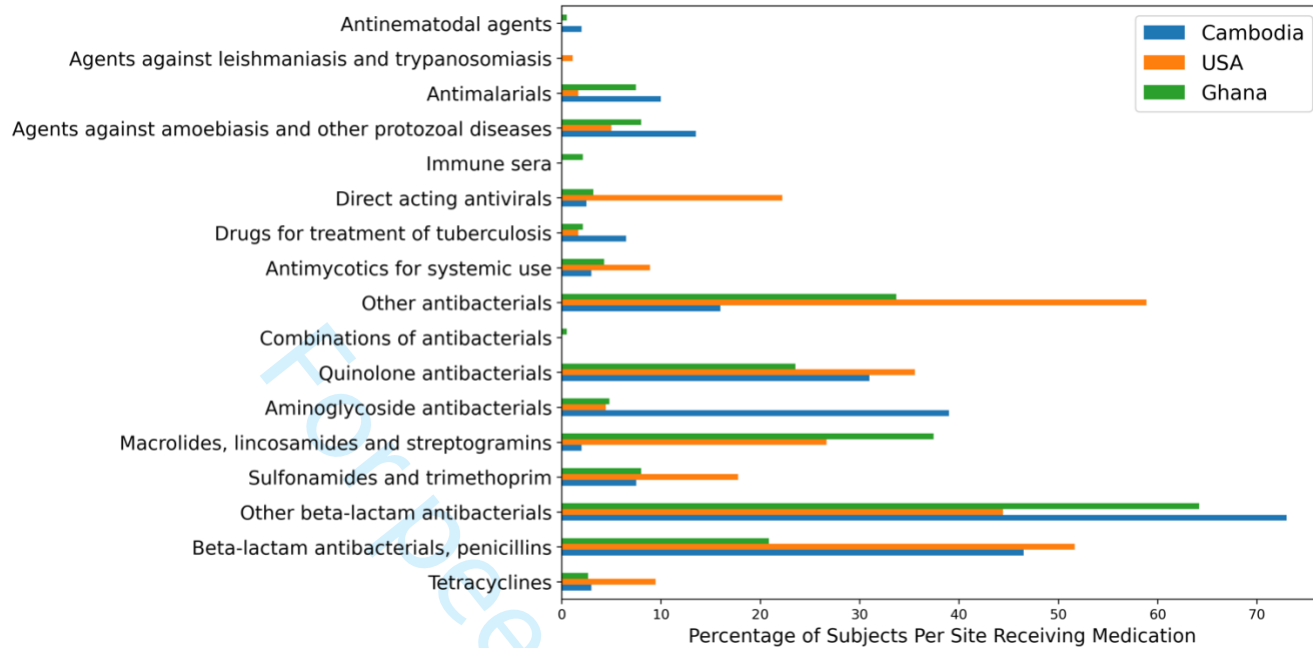

**Supplementary Figure S2.** Prevalence of antibiotics received per site.

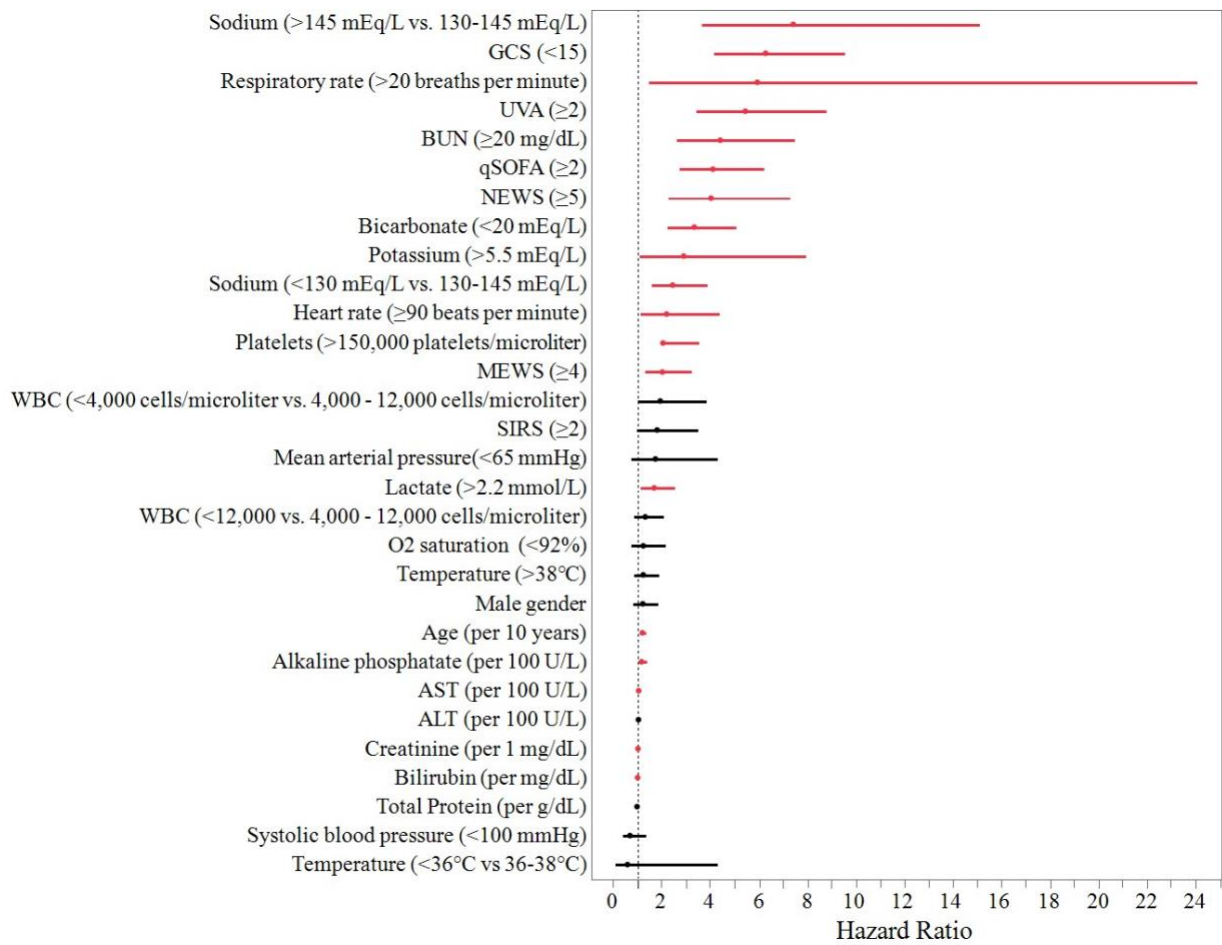

**Supplementary Figure S3.** Forest plot of hazard ratios from bivariate Cox regression models for risk of death at 28-day for sepsis scores, physiologic parameters, and clinical laboratory parameters.

# BMJ Open

## Validation of screening tools for predicting mortality across multi-site international sepsis cohorts

|                               |                                                                                                                                                                                                                                                                                                                                                                                                                                                                                                                                                                                                                                                                                                                                                                                                                                                                                                                                                                                                                                                                                                                                                                                                                                                                                                                                                                                                                                                                                                                                                                                                                                                                                                                                                                                                                                                                                                                                                                                                                                                                                                                                                                                                                                                 |
|-------------------------------|-------------------------------------------------------------------------------------------------------------------------------------------------------------------------------------------------------------------------------------------------------------------------------------------------------------------------------------------------------------------------------------------------------------------------------------------------------------------------------------------------------------------------------------------------------------------------------------------------------------------------------------------------------------------------------------------------------------------------------------------------------------------------------------------------------------------------------------------------------------------------------------------------------------------------------------------------------------------------------------------------------------------------------------------------------------------------------------------------------------------------------------------------------------------------------------------------------------------------------------------------------------------------------------------------------------------------------------------------------------------------------------------------------------------------------------------------------------------------------------------------------------------------------------------------------------------------------------------------------------------------------------------------------------------------------------------------------------------------------------------------------------------------------------------------------------------------------------------------------------------------------------------------------------------------------------------------------------------------------------------------------------------------------------------------------------------------------------------------------------------------------------------------------------------------------------------------------------------------------------------------|
| Journal:                      | <i>BMJ Open</i>                                                                                                                                                                                                                                                                                                                                                                                                                                                                                                                                                                                                                                                                                                                                                                                                                                                                                                                                                                                                                                                                                                                                                                                                                                                                                                                                                                                                                                                                                                                                                                                                                                                                                                                                                                                                                                                                                                                                                                                                                                                                                                                                                                                                                                 |
| Manuscript ID                 | bmjopen-2022-067840.R1                                                                                                                                                                                                                                                                                                                                                                                                                                                                                                                                                                                                                                                                                                                                                                                                                                                                                                                                                                                                                                                                                                                                                                                                                                                                                                                                                                                                                                                                                                                                                                                                                                                                                                                                                                                                                                                                                                                                                                                                                                                                                                                                                                                                                          |
| Article Type:                 | Original research                                                                                                                                                                                                                                                                                                                                                                                                                                                                                                                                                                                                                                                                                                                                                                                                                                                                                                                                                                                                                                                                                                                                                                                                                                                                                                                                                                                                                                                                                                                                                                                                                                                                                                                                                                                                                                                                                                                                                                                                                                                                                                                                                                                                                               |
| Date Submitted by the Author: | 01-Dec-2022                                                                                                                                                                                                                                                                                                                                                                                                                                                                                                                                                                                                                                                                                                                                                                                                                                                                                                                                                                                                                                                                                                                                                                                                                                                                                                                                                                                                                                                                                                                                                                                                                                                                                                                                                                                                                                                                                                                                                                                                                                                                                                                                                                                                                                     |
| Complete List of Authors:     | <p>Blair, Paul; Henry M Jackson Foundation for the Advancement of Military Medicine Inc, Austere environments Consortium for Enhanced Sepsis Outcomes (ACESO)</p> <p>Mehta, Rittal; Henry M Jackson Foundation for the Advancement of Military Medicine Inc</p> <p>Oppong, Chris; Komfo Anokye Teaching Hospital, Emergency Medicine</p> <p>Tin, Som; Takeo Provincial Referral Hospital</p> <p>Ko, Emily; Duke University School of Medicine</p> <p>Tsalik, Ephraim ; Duke University School of Medicine</p> <p>Chenoweth, Josh; Henry M Jackson Foundation for the Advancement of Military Medicine Inc</p> <p>Rozo, Michelle; Henry M Jackson Foundation for the Advancement of Military Medicine Inc</p> <p>Adams, Nehkonti; Naval Medical Research Center Infectious Diseases Directorate</p> <p>Beckett, Charmagne; Naval Medical Research Center Infectious Diseases Directorate</p> <p>Woods, Christopher; Duke University School of Medicine; Duke Global Health Institute</p> <p>Striegel, Deborah; Henry M Jackson Foundation for the Advancement of Military Medicine Inc</p> <p>Salvador, Mark G; Henry M Jackson Foundation for the Advancement of Military Medicine Inc</p> <p>Brandsma, Joost; Henry M Jackson Foundation for the Advancement of Military Medicine Inc</p> <p>McKean, Lauren; Henry M Jackson Foundation for the Advancement of Military Medicine Inc</p> <p>Mahle, Rachael; Duke University School of Medicine</p> <p>Hulsey, William R; Henry M Jackson Foundation for the Advancement of Military Medicine Inc</p> <p>Krishnan, Subramaniam; Henry M Jackson Foundation for the Advancement of Military Medicine Inc</p> <p>Prouty, Michael; US Naval Medical Research Unit No 2</p> <p>Letizia, Andrew; Naval Medical Research Unit-3 Ghana Detachment</p> <p>Fox, Anne; Naval Medical Research Unit-3 Ghana Detachment</p> <p>Faix, Dennis; US Naval Medical Research Unit No 2</p> <p>Lawler, James V; University of Nebraska Medical Center, Global Center for Health Security; University of Nebraska Medical Center, Department of Internal Medicine</p> <p>Duplessis, Chris; Austere environments Consortium for Enhanced Sepsis Outcomes (ACESO), Biological Defense Research Directorate, Naval</p> |

|                                    |                                                                                                                                                                                                                                                                                                                                                                                                                                                                                                                                                                                                                                                                                   |
|------------------------------------|-----------------------------------------------------------------------------------------------------------------------------------------------------------------------------------------------------------------------------------------------------------------------------------------------------------------------------------------------------------------------------------------------------------------------------------------------------------------------------------------------------------------------------------------------------------------------------------------------------------------------------------------------------------------------------------|
|                                    | <p>Medical Research Center-Frederick<br/> Gregory, Michael; Austere environments Consortium for Enhanced Sepsis<br/> Outcomes (ACESO), Biological Defense Research Directorate, Naval<br/> Medical Research Center-Frederick<br/> Vantha, Te; Takeo Provincial Referral Hospital<br/> Owusu-Ofori, Alex Kwame; Komfo Anokye Teaching Hospital<br/> Ansong, Daniel; Komfo Anokye Teaching Hospital, Emergency Medicine<br/> Oduro, George; Komfo Anokye Teaching Hospital<br/> Schully, Kevin; Henry M Jackson Foundation for the Advancement of<br/> Military Medicine Inc<br/> Clark, Danielle; Henry M Jackson Foundation for the Advancement of<br/> Military Medicine Inc</p> |
| <b>Primary Subject<br>Heading</b>: | Global health                                                                                                                                                                                                                                                                                                                                                                                                                                                                                                                                                                                                                                                                     |
| Secondary Subject Heading:         | Intensive care, Infectious diseases, Evidence based practice                                                                                                                                                                                                                                                                                                                                                                                                                                                                                                                                                                                                                      |
| Keywords:                          | INFECTIOUS DISEASES, Adult intensive & critical care < INTENSIVE &<br>CRITICAL CARE, Epidemiology < INFECTIOUS DISEASES, Tropical<br>medicine < INFECTIOUS DISEASES, Public health < INFECTIOUS<br>DISEASES                                                                                                                                                                                                                                                                                                                                                                                                                                                                       |
|                                    |                                                                                                                                                                                                                                                                                                                                                                                                                                                                                                                                                                                                                                                                                   |

SCHOLARONE™  
Manuscripts



I, the Submitting Author has the right to grant and does grant on behalf of all authors of the Work (as defined in the below author licence), an exclusive licence and/or a non-exclusive licence for contributions from authors who are: i) UK Crown employees; ii) where BMJ has agreed a CC-BY licence shall apply, and/or iii) in accordance with the terms applicable for US Federal Government officers or employees acting as part of their official duties; on a worldwide, perpetual, irrevocable, royalty-free basis to BMJ Publishing Group Ltd ("BMJ") its licensees and where the relevant Journal is co-owned by BMJ to the co-owners of the Journal, to publish the Work in this journal and any other BMJ products and to exploit all rights, as set out in our [licence](#).

The Submitting Author accepts and understands that any supply made under these terms is made by BMJ to the Submitting Author unless you are acting as an employee on behalf of your employer or a postgraduate student of an affiliated institution which is paying any applicable article publishing charge ("APC") for Open Access articles. Where the Submitting Author wishes to make the Work available on an Open Access basis (and intends to pay the relevant APC), the terms of reuse of such Open Access shall be governed by a Creative Commons licence – details of these licences and which [Creative Commons](#) licence will apply to this Work are set out in our licence referred to above.

Other than as permitted in any relevant BMJ Author's Self Archiving Policies, I confirm this Work has not been accepted for publication elsewhere, is not being considered for publication elsewhere and does not duplicate material already published. I confirm all authors consent to publication of this Work and authorise the granting of this licence.

1  
2  
3 1 **Title:** Validation of screening tools for predicting mortality across multi-site international sepsis cohorts

4  
5 2 **Authors:** Paul W. Blair<sup>1,2\*</sup>, Rittal Mehta<sup>1</sup>, Chris Oppong<sup>3</sup>, Tin Som<sup>4</sup>, Emily R. Ko<sup>5</sup>, Ephraim L. Tsalik<sup>5</sup>,  
6  
7 3 Josh Chenoweth<sup>1</sup>, Michelle Rozo<sup>1</sup>, Nehkonti Adams<sup>6</sup>, Charmagne Beckett<sup>6</sup>, Christopher W. Woods<sup>5</sup>,  
8  
9 4 Deborah A. Striegel<sup>1</sup>, Mark Salvador<sup>1</sup>, Joost Brandsma<sup>1</sup>, Lauren McKean<sup>1</sup>, Rachael E. Mahle<sup>5</sup>, William  
10  
11 5 Hulseley<sup>1</sup>, Subramaniam Krishnan<sup>1</sup>, Michael Prouty<sup>7</sup>, Andrew Letizia<sup>8</sup>, Anne Fox<sup>8</sup>, Dennis Faix<sup>7</sup>, James V.  
12  
13 6 Lawler<sup>9</sup>, Chris Duplessis<sup>10</sup>, Michael G Gregory<sup>10</sup>, Te Vantha<sup>4</sup>, Alex Owusu-Ofori<sup>3</sup>, Daniel Ansong<sup>3</sup>,  
14  
15 7 George Oduro<sup>3</sup>, Kevin L. Schully<sup>1,10</sup>, and Danielle V. Clark<sup>1</sup>.

16  
17  
18  
19 8 **Affiliation:**

20  
21 9 <sup>1</sup>Austere environments Consortium for Enhanced Sepsis Outcomes (ACESO), Henry M. Jackson  
22 10 Foundation for the Advancement of Military Medicine, Inc., Bethesda, MD, United States of America.  
23 11 <sup>2</sup>Johns Hopkins University School of Medicine, MD, United States of America. <sup>3</sup>Komfo Anokye  
24 12 Teaching Hospital, Kumasi, Ghana. <sup>4</sup>Takeo Provincial Referral Hospital, Takeo, Cambodia. <sup>5</sup>Duke  
25 13 University Division of Infectious Diseases, Duke University School of Medicine, Durham, NC, USA.  
26 14 <sup>6</sup>Naval Medical Research Center Infectious Diseases Directorate, Bethesda, MD. <sup>7</sup>Naval Medical  
27 15 Research Unit-2, Phnom Penh, Cambodia. <sup>8</sup>Naval Medical Research Unit-3 Ghana Detachment, Accra,  
28 16 Ghana. <sup>9</sup>Global Center for Health Security at Nebraska and Division of Infectious Disease, Department of  
29 17 Internal Medicine, University of Nebraska Medical Center, Omaha, NE, United States of America.  
30 18 <sup>10</sup>Austere environments Consortium for Enhanced Sepsis Outcomes (ACESO), Biological Defense  
31 19 Research Directorate, Naval Medical Research Center-Frederick, Ft. Detrick, MD, United States of  
32 20 America

33  
34  
35 21

36  
37 22

38  
39 23

40  
41 24

42  
43 25

44  
45 26

46  
47 27

48  
49 28 **\*Corresponding Author:** Paul W. Blair, MD MSPH MHS. Henry M. Jackson Foundation for the  
50  
51 29 Advancement of Military Medicine. 6720A Rockledge Dr, Bethesda, MD 20817. E-mail:

52  
53 30 [pblair6@jhmi.edu](mailto:pblair6@jhmi.edu)

54  
55  
56 31



1  
2  
3 **32 Abstract:**  
4

5 **33** Word count: 276  
6

7 **34 Objectives:** We evaluated the performance of commonly used sepsis screening tools across prospective  
8  
9 **35** sepsis cohorts in the United States, Cambodia, and Ghana.  
10

11 **36 Design:** Prospective cohort studies  
12

13 **37 Setting and participants:** From 2014 to 2021, participants with 2 or more SIRS (Systemic Inflammatory  
14  
15 **38** Response Syndrome) criteria and suspected infection were enrolled in emergency departments and  
16  
17 **39** medical wards at hospitals in the Cambodia and Ghana and hospitalized participants with suspected  
18  
19 **40** infection were enrolled in the United States. Cox proportional hazards regression was performed, and  
20  
21 **41** Harrell's C-statistic calculated to determine 28-day mortality prediction performance of the qSOFA score  
22  
23 **42**  $\geq 2$ , SIRS score  $\geq 3$ , NEWS  $\geq 5$ , MEWS  $\geq 5$ , or UVA score  $\geq 2$ . Screening tools were compared to baseline  
24  
25 **43** risk (age and sex) with the Wald test.  
26  
27

28 **44 Results:** The cohorts included 567 participants (42.9% female) including 187 participants from Kumasi,  
29  
30 **45** Ghana, 200 participants from Takeo, Cambodia, and 180 participants from Durham, North Carolina in the  
31  
32 **46** United States. The pooled mortality was 16.4% at 28-days. The mortality prediction accuracy increased  
33  
34 **47** from baseline risk with the MEWS (C-statistic: 0.63, 95% CI: 0.58, 0.68;  $p=0.002$ ), NEWS (C-statistic:  
35  
36 **48** 0.68; 95% confidence interval [CI]: 0.64, 0.73;  $p<0.001$ ), qSOFA (C-statistic: 0.70, 95% CI: 0.64, 0.75;  
37  
38 **49**  $p<0.001$ ), UVA score (C-statistic: 0.73, 95% CI: 0.69, 0.78;  $p<0.001$ ), but not with SIRS (0.60; 95% CI:  
39  
40 **50** 0.54, 0.65;  $p=0.13$ ). Within individual cohorts, only the UVA score in Ghana performed better than  
41  
42 **51** baseline risk (C-statistic: 0.77; 95% CI: 0.71, 0.83;  $p<0.001$ ).  
43  
44

45 **52 Conclusions:** Among the cohorts, MEWS, NEWS, qSOFA, and UVA scores performed better than  
46  
47 **53** baseline risk, largely driven by accuracy improvements in Ghana, while SIRS scores did not improve  
48  
49 **54** prognostication accuracy. Prognostication scores should be validated within the target population prior to  
50  
51 **55** clinical use.  
52

53 **56** Keywords: Analysis, Survival; sepsis; Cohort Studies; Prognosis; Global Health  
54  
55

56 **57**  
57  
58  
59  
60

1  
2  
3 **58 Strengths and limitations of this study:**  
4

- 5 **59** • While single-centre cohorts and retrospective analyses have been performed, the optimal sepsis  
6  
7 **60** screening tool for prognostication in low- and middle-income countries is unknown. This study  
8  
9 **61** includes two well-characterized sepsis cohorts in LMICs and a cohort in a high-resource setting  
10  
11 **62** for comparison.  
12  
13  
14 **63** • Five sepsis screening tools (i.e., qSOFA score, SIRS score, NEWS, MEWS, and UVA score)  
15  
16 **64** were evaluated across three international cohorts for one-month mortality prognostication,  
17  
18 **65** providing comprehensive performance estimates in settings with disparate causes of sepsis.  
19  
20 **66** • Diagnostic testing differed at each site and mortality specifically due to sepsis could not be  
21  
22 **67** determined.  
23  
24 **68** • Enrolment was by convenience sampling within the referral hospital catchment area and may not  
25  
26 **69** be representative of the general population within these countries.  
27  
28  
29 **70** • While SIRS was identified as a tool with inferior prognostic performance, sample size limitations  
30  
31 **71** in each of the cohorts may have led to decreased ability to identify differences between each  
32  
33 **72** screening tool.  
34

35 **73**

36  
37 **74**

38  
39 **75 Narrative:**

40  
41 **76** Word count: 3,783  
42  
43  
44 **77**

45 **78 INTRODUCTION**

46  
47 **79** Sepsis, a syndrome resulting from a systemic dysregulated host response to an infection, is estimated to  
48  
49 **80** cause six million deaths per year but is likely an underestimate due to limited information from low- and  
50  
51 **81** middle-income countries (LMICs) where 87% of the world population live [1]. Despite declining age-  
52  
53  
54  
55  
56  
57  
58  
59  
60

1  
2  
3 82 standardized incidence and mortality, sepsis remains a major cause of health loss worldwide and has an  
4  
5 83 especially high health-related burden in LMICs[2].  
6

7 84  
8  
9 85 Clinical sepsis guidelines developed in the Western world may not be applicable in resource-limited settings  
10  
11 86 and moreover can lead to detrimental effects on sepsis care and management when applied in these  
12  
13 87 conditions due to decreased access to resources to manage iatrogenesis from fluid resuscitation [3, 4]. In  
14  
15 88 contrast to the United States, pathogens that lead to directly lead to vascular injury are common causes of  
16  
17 89 acute febrile illness in Cambodia and Ghana such as dengue virus, malaria, or rickettsia and may alter  
18  
19 90 empiric treatment response [5]. While early recognition and treatment of sepsis is critical, most sepsis scores  
20  
21 91 or early warning systems were derived from cohorts outside of LMICs. Differences in causes of sepsis,  
22  
23 92 available treatments, and available resources for supportive care should affect management strategies but  
24  
25 93 evidence is limited and optimal clinical scores or biomarkers for sepsis identification are unknown in these  
26  
27 94 settings. Multi-site international sepsis studies are essential for evaluating current and future sepsis tools to  
28  
29 95 ensure effectiveness in resource-limited settings and across populations.  
30  
31

32 96  
33  
34 97 The most validated prognostication scores, SOFA (Sequential Organ Failure Assessment) and the  
35  
36 98 APACHE IV, have been developed for prognostication but require an arterial blood gas and multiple  
37  
38 99 laboratory parameters [6, 7] that are not widely available in low-resource settings. The qSOFA (quick  
39  
40 100 SOFA) is an abbreviated score that does not require laboratory parameters. The qSOFA is one of the most  
41  
42 101 widely adopted sepsis screening tools and has largely replaced the SIRS (Systemic Inflammatory Response  
43  
44 102 Syndrome) criteria as the standard abbreviated sepsis screening tool as part of the Sepsis-3 definition to  
45  
46 103 identify septic patients [8]. The qSOFA and other sepsis screening tools (i.e., Modified Early Warning  
47  
48 104 Score [MEWS], National Early Warning Score [NEWS], and Universal Vital Assessment [UVA]) are often  
49  
50 105 used clinically to identify those at risk of sepsis, but these tools have been studied for their ability to  
51  
52 106 prognosticate mortality or poor composite outcomes among hospitalized adults[9-12]. Studies have  
53  
54 107 evaluated these tools for predicting in-hospital mortality but the performance of these tools and the  
55  
56  
57  
58  
59  
60

1  
2  
3 108 prevalence of 28-day mortality, a common metric of sepsis outcomes, have yet to be described across both  
4  
5 109 high- and low-resource settings using similar methods [9, 13, 14].  
6

7 110  
8  
9 111 We used prospective multi-site international cohorts that are part of the Austere environments Consortium  
10  
11 112 for Enhanced Sepsis Outcomes (ACESO) consortium to validate commonly used sepsis screening tools  
12  
13 113 [15]. In contrast to APACHE IV and SOFA, these tools can be quickly performed with limited laboratory  
14  
15 114 test results. We hypothesized that qSOFA may perform poorly in LMIC populations compared to the UVA  
16  
17 115 score due to differences in causes of sepsis. We describe the diverse clinical characteristics, the aetiologies  
18  
19 116 of suspected sepsis within these cohorts, and the performance of sepsis screening tools in current clinical  
20  
21 117 use for predicting mortality at one month post enrolment.  
22  
23

24 118  
25  
26 119 **METHODS**  
27  
28 120 From May 2014 to November 2015, 200 participants were enrolled into a prospective observational study  
29  
30 121 of sepsis at Takeo Provincial Hospital in Takeo Province Cambodia [16] (Figure 1). This study was  
31  
32 122 followed by a prospective study at Duke University Hospital in Durham, North Carolina, which enrolled  
33  
34 123 180 participants from December 2014 to March 2016. In Kumasi, Ghana, 187 participants were enrolled at  
35  
36 124 Komfo Anokye Teaching Hospital from July 2016 to October 2017.  
37  
38  
39

40 125 Hospitalized patients  $\geq 18$  years of age whose attending physician judged them to have an active infection  
41  
42 126 were considered for inclusion for each of the three cohorts. Additional inclusion and exclusion criteria  
43  
44 127 were required in Cambodia and Ghana but not required in the United States protocol. In Cambodia and  
45  
46 128 Ghana, participants were required to meet least two clinical criteria for systemic inflammatory response  
47  
48 129 syndrome (SIRS) during screening. In Cambodia and Ghana, patients were excluded if they had known  
49  
50 130 malignancy, chronic renal/hepatic insufficiency, immunosuppressive conditions (except HIV) or systemic  
51  
52 131 steroid usage that exceeded 20mg/day to prevent confounding in future biomarker studies. Patients were  
53  
54 132 also excluded in Cambodia and Ghana if they had a history of organ transplant, hemodynamically  
55  
56  
57  
58  
59  
60

1  
2  
3 133 significant gastrointestinal bleeding, anatomic or functional asplenia, acute cardiovascular disease,  
4  
5 134 general anaesthesia, or surgery in the past week prior to enrolment, women who were pregnant, patients  
6  
7 135 who had a haemoglobin less than 7 g/dL or weighed less than 35kg. Hospital physicians who deemed  
8  
9 136 their patients too ill to participate could defer enrolment.  
10

11  
12  
13 137 *Study procedures*

14  
15 138 Following informed consent, study team members conducted a detailed medical history, including prior  
16  
17 139 medications, and physical exam. Responses were recorded on a standardized case report form and  
18  
19 140 included demographics, medical history, physical exam findings, and admission diagnoses. Study specific  
20  
21 141 procedures conducted in Cambodia were described in detail by Rozo et al [17]. Similar enrolment and  
22  
23 142 study procedures were followed in Kumasi, Ghana and in Durham, North Carolina, USA. Blood was  
24  
25 143 collected at the time of enrolment, then at 6 hours later, and at 24 hours later. In Ghana and Cambodia,  
26  
27 144 standardized clinical tests included a peripheral venous blood gas with lactate, complete blood count,  
28  
29 145 complete metabolic panel, optional HIV screening with consent (Alere Determine HIV1/2, Abbott, OK,  
30  
31 146 United States), malaria rapid diagnostic tests (SD Bioline Ag. P.f./Pan, Abbott, OK, United States) and  
32  
33 147 aerobic blood cultures (one aerobic bottle, Bactec 9050, BD, NJ, United States) as part of study  
34  
35  
36 148 procedures in Ghana and Cambodia. Microbiologic results were available if collected through routine  
37  
38 149 clinical care across cohorts. Additional molecular testing and next generation sequencing for pathogens  
39  
40 150 were also performed on blood samples in the Cambodia cohort as previously described [17]. Participants  
41  
42 151 were followed throughout their hospitalization and a record review performed at discharge.  
43  
44

45 152 An interview was performed, and blood samples were collected at a 28-day follow-up visit across cohorts.  
46  
47 153 When patients could not return in person, study team members attempted to conduct an interview with  
48  
49 154 patients or a legally authorized representative by telephone. Fatal outcomes among each discharged  
50  
51 155 participant were also determined.  
52  
53  
54  
55  
56  
57  
58  
59  
60

1  
2  
3 156 Using clinical data from case report forms and microbiology diagnostic information, clinical adjudication  
4  
5 157 was performed by three physician reviewers (internal medicine or infectious diseases) to determine the  
6  
7 158 source of infection by anatomic location and pathogen class (i.e., bacterial, parasitic, viral, or fungal).  
8  
9 159 This was graded on a low, moderate, and high level of confidence by two independent reviewers and a  
10  
11 160 third reviewer served as a tiebreaker for discordant conclusions. If the third reviewer did not agree with  
12  
13 161 either adjudicator, then the decision was determined by committee. Microbiologic results presented  
14  
15 162 include those adjudicated to be clinically relevant to participant's acute illness.  
16  
17  
18

### 19 163 *Patient and Public Involvement*

20  
21 164 Patients were not involved in recruitment, design, conduct, or dissemination plans of our research. Results  
22  
23 165 of this study were disseminated to hospital and clinical leadership at Takeo Provincial Hospital and  
24  
25 166 Komfo Anokye Teaching Hospital.  
26  
27  
28

### 29 168 *Statistical analysis*

30  
31 169 Summary statistics were calculated for the cohorts individually and pooled, comparing baseline  
32  
33 170 demographics (e.g., gender, age, ethnicity, selected medical comorbidities), baseline screening tool  
34  
35 171 scores, physiologic parameters, baseline clinical laboratory values using either Chi-square (categorical  
36  
37 172 values), Fishers exact (categorical values), or Kruskal-Wallis (continuous values) tests. Prevalence of  
38  
39 173 diagnoses were described for each cohort by organ system and pathogen type and by anatomic site.  
40  
41 174  
42  
43 175 After checking the proportional hazards assumption, Cox regression was performed with bivariate models  
44  
45 176 to evaluate increased risk of death in each cohort by baseline demographics, comorbid conditions,  
46  
47 177 physiologic parameters, and clinical laboratory parameters. Physiologic parameters and clinical laboratory  
48  
49 178 parameters were modelled as dichotomous or ordinal parameters at clinically relevant abnormal range cut  
50  
51 179 offs (e.g., blood urea nitrogen  $\geq 20$ mg/dL) to explore associations with increased risk of death and for  
52  
53 180 clinical inference. Screening tools were dichotomized according to current usage, including qSOFA score  
54  
55  
56  
57  
58  
59

1  
2  
3 181  $\geq 2$  (range, 0 [best] to 3 [worst] points), SIRS score  $\geq 2$  (range, 0 [best] to 4 [worst] points), MEWS  $\geq 5$   
4  
5 182 (range, 0 [best] to 13 [worst] points), NEWS  $\geq 5$  (range, 0 [best] to 20 [worst] points), and UVA  $\geq 2$   
6  
7 183 (range, 0 [best] to 13 [worst])[13] and were evaluated in Cox regression models unadjusted and adjusted  
8  
9 184 for age and sex for risk of death [9]. Glasgow Coma Scale Score (GCS; range, 3 [worst] to 15 [best]  
10  
11 185 points) of less than 15 was used for estimation of the qSOFA score, and a GCS of  $\leq 3$  for  
12  
13 186 unresponsiveness for NEWS, and GCS score 3-15 for the “alert, verbal, pain, unresponsive” scale  
14  
15 187 (AVPU; alert: GCS 13-15, voice: GCS 9-12; pain: GCS 4-8; unresponsiveness: GCS  $\leq 3$ ) score  
16  
17 188 approximation for MEWS [18, 19]. Data was administratively right censored past 28 days. The Harrell’s  
18  
19 189 C-statistic was calculated for each screening tool for each cohort, the cohorts combined, and Cambodia  
20  
21 190 and Ghana cohorts pooled [20]. This statistic is a performance analogous to area under the receiver  
22  
23 191 operating characteristic curve (AUROC) but accounts for differences over time with survival outcomes.  
24  
25 192 C-statistic confidence interval estimates were determined.[21] The Cox regression Wald test p-values  
26  
27 193 were calculated for each score covariate adjusting for baseline risk estimated by age and sex [22]. P-  
28  
29 194 values  $< 0.002$  were considered significant using a Bonferroni correction for multiple comparisons. Cohort  
30  
31 195 sample sizes were determined a priori through Monte Carlo simulation modelling for prognostic  
32  
33 196 biomarker identification. All statistical analyses were performed in SAS (Statistical Analytical Software,  
34  
35 197 version 9.4), R version 4.0.2 [23] or Stata (version 15.0; StataCorp LLC, College Station, TX, USA) [24].  
36  
37  
38  
39  
40

## 41 199 RESULTS

### 42 200 *Summary demographics, sepsis severity, and laboratory findings*

43 201 There were 567 participants across the cohorts including 187 from Kumasi, Ghana, 200 from Takeo,  
44  
45 202 Cambodia, and 180 from Durham, North Carolina, United States (**Figure 1**). The study population was  
46  
47 203 predominantly male (57.1% male), with more male participants enrolled in Cambodia than at other sites  
48  
49 204 (68.0% vs 55.0% in the U.S. and 52.4% in Ghana). The overall median age was 50 years (interquartile  
50  
51 205 range [IQR], 36 to 63), which was similar across cohorts (**Table 1**). Previously diagnosed comorbid  
52  
53  
54  
55  
56  
57  
58  
59  
60

206 conditions were most common at the U.S. site including a history of cardiovascular (65.6%; N=118),  
 207 respiratory (42.2%; N=76), or gastrointestinal (36.7%; N=66) conditions.

**Table 1.** Baseline demographic characteristics stratified by sites.

| Characteristic                    | Total<br>(n=567) | Takeo,<br>Cambodia<br>(n=200) | Durham,<br>USA<br>(n=180) | Kumasi,<br>Ghana<br>(n=187) | p-value** |
|-----------------------------------|------------------|-------------------------------|---------------------------|-----------------------------|-----------|
| Female gender – no. (%)           | 243 (42.9%)      | 64 (32.0%)                    | 81 (45.0%)                | 98 (52.4%)                  | < 0.001   |
| Age – years, median (IQR)         | 50 (36 – 63)     | 50 (36 – 62)                  | 52.5 (40 – 63)            | 46 (35 – 63)                | 0.151     |
| Medical history* – no. (%)        |                  |                               |                           |                             |           |
| Cancer                            | 44 (9.9%)        | 0 (0.0%)                      | 44 (24.4%)                | 0 (0.0%)                    | < 0.001   |
| Cardiovascular                    | 202 (41.4%)      | 22 (18.2%)                    | 118 (65.6%)               | 62 (33.2%)                  | < 0.001   |
| Dermatologic                      | 15 (3.1%)        | 1 (0.8%)                      | 14 (7.8%)                 | 0 (0.0%)                    | < 0.001   |
| Endocrine                         | 126 (25.8%)      | 6 (5.0%)                      | 74 (41.1%)                | 46 (24.6%)                  | < 0.001   |
| Gastrointestinal                  | 76 (15.6%)       | 4 (3.3%)                      | 66 (36.7%)                | 6 (3.2%)                    | < 0.001   |
| Genitourinary or reproductive     | 34 (7.0%)        | 1 (0.8%)                      | 33 (18.3%)                | 0 (0.0%)                    | < 0.001   |
| HIV                               | 26 (4.7%)        | 12 (6.2%)                     | 8 (4.5%)                  | 6 (3.2%)                    | 0.388     |
| Neurological                      | 62 (12.7%)       | 1 (0.8%)                      | 44 (24.4%)                | 17 (9.1%)                   | < 0.001   |
| Other                             | 206 (42.2%)      | 48 (39.7%)                    | 151 (83.9%)               | 7 (3.7%)                    | < 0.001   |
| Psychiatric                       | 143 (29.3%)      | 41 (33.9%)                    | 78 (43.3%)                | 24 (12.8%)                  | < 0.001   |
| Renal                             | 41 (8.4%)        | 0 (0.0%)                      | 41 (22.8%)                | 0 (0.0%)                    | < 0.001   |
| Respiratory                       | 89 (18.2%)       | 7 (5.8%)                      | 76 (42.2%)                | 6 (3.2%)                    | < 0.001   |
| Rheumatologic                     | 29 (5.9%)        | 1 (0.8%)                      | 28 (15.6%)                | 0 (0.0%)                    | < 0.001   |
| Surgery                           | 27 (5.5%)        | 0 (0.0%)                      | 22 (12.2%)                | 5 (2.7%)                    | < 0.001   |
| Baseline scores – no. (%)         |                  |                               |                           |                             |           |
| MEWS ( $\geq 4$ )                 | 315 (57.8%)      | 81 (40.7%)                    | 105 (65.6%)               | 129 (69.3%)                 | < 0.001   |
| NEWS score ( $\geq 5$ )           | 324 (61.6%)      | 90 (47.9%)                    | 98 (64.5%)                | 136 (73.1%)                 | < 0.001   |
| qSOFA ( $\geq 2$ )                | 139 (25.4%)      | 22 (11.1%)                    | 48 (29.6%)                | 69 (37.1%)                  | < 0.001   |
| SIRS ( $\geq 2$ )                 | 447 (81.8%)      | 125 (68.3%)                   | 157 (89.2%)               | 165 (88.2%)                 | < 0.001   |
| UVA ( $\geq 2$ )                  | 199 (37.8%)      | 47 (25.8%)                    | 68 (42.8%)                | 84 (45.4%)                  | < 0.001   |
| Baseline scores<br>(median [IQR]) |                  |                               |                           |                             |           |
| MEWS                              | 4 (3-6)          | 3 (2-5)                       | 1 (0-4)                   | 1 (1-2)                     | < 0.001   |



**Table 1.** Baseline demographic characteristics stratified by sites.

| Characteristic | Total<br>(n=567) | Takeo,<br>Cambodia<br>(n=200) | Durham,<br>USA<br>(n=180) | Kumasi,<br>Ghana<br>(n=187) | p-value** |
|----------------|------------------|-------------------------------|---------------------------|-----------------------------|-----------|
| NEWS           | 6 (3-8)          | 4 (2-7)                       | 7 (3-9)                   | 6 (4-8)                     | < 0.001   |
| qSOFA          | 1 (1-2)          | 1 (0-1)                       | 1 (0-2)                   | 1 (1-2)                     | < 0.001   |
| SIRS           | 2 (2-3)          | 2 (1-3)                       | 3 (2-3)                   | 3 (2-3)                     | < 0.001   |
| UVA            | 1 (0-3)          | 1 (0-2)                       | 1 (0-4)                   | 1 (0-4)                     | < 0.001   |

\*There were 79 subjects without comorbidity information in the Cambodia cohort. \*\*Categorical parameters compared with chi-squared test and numeric parameters compared with Kruskal-Wallis test.

208 Clinical physiologic and laboratory value abnormalities at enrolment were common with median  
 209 respiratory rate at 24 (IQR: 20 to 30), the median white blood count elevated at  $12.05 \times 10^9$  cells/L (IQR:  
 210 8.13 to  $16.6 \times 10^9$  cells/L), and median lactate elevated at 2.27 mmol/L (IQR: 1.66 to 3.09 mmol/L)  
 211 (**Supplementary Table S1**). At enrolment, the proportion of an elevated qSOFA ( $\geq 2$ ) at baseline was  
 212 highest at the Ghana site with 44.4% (N=83) of participants compared to 26.0% (N=52) in Cambodia and  
 213 22.2% (N=40) in the United States. The SIRS, MEWS, NEWS, and UVA screening tools were similarly  
 214 higher in the Ghana cohort.

215

#### 216 *Pathogens detected*

217 The most common positive microbiologic results overall included bacteraemia (N=83), respiratory culture  
 218 growth (N=19), serum hepatitis B surface antigen (N=15), and malaria rapid diagnostic tests (N=11). A  
 219 minority (121 of 567, 21.3%) of subjects had confirmed infections with complete adjudicator agreement  
 220 using all available sources of clinical microbiologic results (with the notable addition of RNA sequencing  
 221 of samples from Cambodia[17]) including 90 (15.9%) bacterial, 17 viral (3.0%), 20 malarial (3.5%), and  
 222 2 (0.3%) fungal infections identified across all cohorts (**Supplementary Figure S1**). These infection  
 223 classes were different among sites (chi-squared test  $p < 0.001$ ).

224

1  
2  
3 225 In Cambodia, the most common bacterial infections with complete adjudicator agreement were *B.*  
4  
5 226 *pseudomallei* (N=10, with blood or respiratory culture growth), presumptive *M. tuberculosis* (N=5, with  
6  
7 227 acid fast positive smears), polymicrobial (N=5), and *O. tsutsugamushi* (N=4, determined by sequencing).  
8  
9 228 The most common causes of bacteraemia (17 total of 200 participants) were *B. pseudomallei* (N=8), *E.*  
10  
11 229 *coli* (N=3), and polymicrobial infections (N=3). Three participants had a positive malaria RDT. Fungal  
12  
13 230 infections were uncommon with 1 participant with non-albicans Candidemia and 1 with cryptococcal  
14  
15 231 meningitis. Two individuals had dengue fever (one PCR positive and one adjudicated IgM positive).  
16  
17 232  
18  
19 233 In Ghana, the most common causes of bacteraemia (culture growth from 28 of 187 participants) were *E.*  
20  
21 234 *coli* (N=6), *S. aureus* (N=6), *Salmonella spp.* (N=5), and *S. pneumoniae* (N=3). Nine participants had a  
22  
23 235 positive malaria RDT and 15 had a positive hepatitis B surface antigen.  
24  
25 236  
26  
27  
28 237 In the United States, the most common causes of bacteraemia (culture growth from 19 of 180  
29  
30 238 participants) were *E.coli* (N=5), *K. pneumoniae* (N=3), polymicrobial (N=2), *Pseudomonas spp.* (N=2),  
31  
32 239 or *S. aureus* (N=2). Viral infections detected by PCR included rhinovirus (N=5), influenza A (N=4),  
33  
34 240 respiratory syncytial virus (N=4), human immunodeficiency virus (N=3), and human metapneumovirus  
35  
36 241 (N=3). There was one participant with *Aspergillus fumigatus* fungal pneumonia.  
37  
38 242  
39  
40

#### 41 243 *Diagnoses and Treatments*

42  
43 244 Across cohorts, the most common organ system sites of infection were lower respiratory tract infection  
44  
45 245 (28.7%; N=163), multifocal or generalized source of infection (including malaria) (13.6%; N=77), and  
46  
47 246 gastrointestinal (including hepatic) (12.7%; N=72) (**Figure S1a**). The most common antibiotics  
48  
49 247 administered in United States, Ghana, and Cambodia were beta-lactam antibiotics (**Supplementary**  
50  
51 248 **Figure S2**), but antibiotic regimens varied widely among sites. The most common antibiotics classes used  
52  
53 249 were other antibacterials (e.g., glycopeptide antibiotics, 58.9%), beta-lactam antibacterials, penicillins  
54  
55 250 (51.7%), and cephalosporin and carbapenem antibacterials (44.4%) in the United States, cephalosporins  
56  
57  
58  
59  
60

1  
2  
3 251 and carbapenems (64.2%), macrolides, lincosamides and streptogramins (37.4%), and other antibacterials  
4  
5 252 (33.7%) in Ghana, and cephalosporins and carbapenems (73.0%), beta-lactam antibacterials, penicillins  
6  
7 253 (46.5%) and aminoglycoside antibacterials (39.0%) in Cambodia.  
8  
9  
10 254

### 11 255 *Survival*

12  
13 256 Among all cohorts, 16.4% (N=93) of participants had died at one month, including 58 (31.0%) in Ghana,  
14  
15 257 22 (11.0%) in Cambodia, and 13 (7.2%) in the U.S (**Figure 1**). Among those that died within one month,  
16  
17 258 median time to death was 4 days (IQR: 1 to 11) in Ghana, 7 days (IQR: 3 to 16) in Cambodia, 10 (IQR: 5  
18  
19 259 to 19) in the U.S., and 5 days (IQR: 2 to 13) overall. Parameters to calculate the qSOFA score and 28-day  
20  
21 260 mortality were available for 96.4% participants. Hyponatremia (>145 mEq/L) had the highest unadjusted  
22  
23 261 risk of death (hazard ratio 6.89, 95% CI: 3.43, 13.85) among parameters tested in bivariate models  
24  
25 262 (**Supplementary Figure S3**). All screening tools were associated with an increased risk of death (**Figure**  
26  
27 263 **2**) with the largest increase among those with an elevated UVA score (**Supplementary Figure S3**). For  
28  
29 264 individuals with a UVA  $\geq 2$  there was a 5.45 times increased risk of death (95% CI: 3.39 to 8.76; C-  
30  
31 265 statistic: 0.70) and those with a qSOFA  $\geq 2$  had a 4.11 times increased risk of death (95% CI: 2.71 to 6.22;  
32  
33 266 C-statistic: 0.66). Those with an elevated SIRS had a 1.81 times increased risk of death (95% CI: 0.94 to  
34  
35 267 3.50; C-statistic:0.53). Elevated NEWS (HR: 4.03; 95% CI: 2.24 to 7.26; C-statistic: 0.66) and MEWS  
36  
37 268 (HR: 2.03; 95% CI: 1.28 to 3.23; C-statistic: 0.53) had similarly increased risks (**Figure 3**).  
38  
39  
40  
41 269

42  
43 270 Accuracy in an adjusted Cox model was highest for UVA (0.73; 95% CI 0.68-0.78) followed by qSOFA  
44  
45 271 (C-statistic: 0.70; 95% CI: 0.64 to 0.75) (**Table 2**). The sensitivity for predicting death was highest with  
46  
47 272 SIRS (89%; 95% CI: 80 to 94%) but specificity was lowest (19%; 95% CI: 16 to 26%). The UVA score  
48  
49 273 had a sensitivity of 74% and specificity of 70%. The qSOFA score had the lowest sensitivity (54%; 95%  
50  
51 274 CI: 44 to 65%) but highest specificity (80%; 95% CI: 76 to 84%). We observed that the qSOFA  
52  
53 275 discrimination for mortality was moderate with a C-statistic of 0.70 adjusting for age and sex (**Figure 3**).  
54  
55 276 There was similar qSOFA accuracy in individual cohorts from the United States (C-statistic 0.71; 95%  
56  
57  
58  
59  
60

277 CI: 0.54 to 0.89), Cambodia (C-statistic: 0.68; 95% CI: 0.59 to 0.77), or Ghana (C-statistic: 0.72; 95% CI:  
 278 0.64 to 0.79) (**Figure 3**). Similarly, the UVA score had moderate accuracy with a C-statistics on 0.73  
 279 (95% CI: 0.68 to 0.78). Other screening scores had similar moderate C-statistic values. The SIRS C-  
 280 statistic was 0.60 (95% CI: 0.54 to 0.65). Among participants with a NEWS score of  $\geq 5$  (62% of the  
 281 pooled cohort), the C-statistic was 0.68 (95% CI: 0.64 to 0.73) and among those with a MEWS score of  
 282  $\geq 4$  (58% of the pooled cohort), the C-statistic was 0.63 (95% CI: 0.58 to 0.68) for death. The qSOFA and  
 283 UVA scores were significantly greater than baseline risk in Ghana in contrast to other scores or cohorts  
 284 (Table 3). The qSOFA score increased prognostication accuracy in the United States cohort with a  $p=0.02$   
 285 but this was not significant after correcting for multiple comparisons. In Cambodia, while not significant

**Table 2.** Performance characteristics of sepsis score across cohorts for predicting 28-day mortality.

| Score               | Sensitivity<br>(95% CI) | Specificity<br>(95% CI) | PPV<br>(95% CI)      | NPV<br>(95% CI)      | Unadjusted<br>Bivariate<br>Cox model<br>C-statistic<br>(95% CI) | Adjusted*<br>Cox<br>model<br>C-statistic<br>(95% CI) | p-value<br>(Wald<br>test) |
|---------------------|-------------------------|-------------------------|----------------------|----------------------|-----------------------------------------------------------------|------------------------------------------------------|---------------------------|
| Age and<br>sex      | –                       | –                       | –                    | –                    | –                                                               | 0.59<br>(0.53,0.64)                                  |                           |
| MEWS $\geq 4$ *     | 0.73 (0.63,<br>0.82)    | 0.45 (0.40,<br>0.49)    | 0.21 (0.16,<br>0.26) | 0.89 (0.85,<br>0.93) | 0.59 (0.54,<br>0.63)                                            | 0.63<br>(0.58,0.68)                                  | <b>0.002**</b>            |
| NEWS $\geq 5$ *     | 0.86<br>(0.77,0.93)     | 0.43<br>(0.38,0.48)     | 0.25<br>(0.23,0.28)  | 0.93 (0.89,<br>0.95) | 0.65 (0.64,<br>0.67)                                            | 0.68<br>(0.64,0.73)                                  | <b>&lt;0.001**</b>        |
| qSOFA<br>$\geq 2$ * | 0.54 (0.44,<br>0.65)    | 0.80 (0.76,<br>0.84)    | 0.35 (0.27,<br>0.44) | 0.90 (0.87,<br>0.93) | 0.66 (0.61,<br>0.71)                                            | 0.70<br>(0.64,0.75)                                  | <b>&lt;0.001**</b>        |
| SIRS $\geq 2$ *     | 0.89 (0.80,<br>0.94)    | 0.19 (0.16,<br>0.23)    | 0.17 (0.14,<br>0.21) | 0.90 (0.82,<br>0.95) | 0.53 (0.50,<br>0.57)                                            | 0.60<br>(0.54,0.65)                                  | 0.134                     |
| UVA $\geq 2$ *      | 0.74<br>(0.64,<br>0.83) | 0.70 (0.65,<br>0.74)    | 0.33 (0.27,<br>0.40) | 0.93<br>(0.90,0.95)  | 0.70 (0.65,<br>0.74)                                            | 0.73<br>(0.68,0.78)                                  | <b>&lt;0.001**</b>        |

\*Adjusted Cox model C-statistic is adjusted for age and gender. Note: p-value are from Wald test of the adjusted Cox regression model.

\*\*Significant at  $p < 0.002$

286 after correction, NEWS ( $p=0.01$ ) and UVA ( $p=0.01$ ) scores increased accuracy greater than baseline risk.  
 287 When pooling LMIC cohorts (i.e., Ghana and Cambodia), after adjustment for age and sex, the qSOFA  
 288 (C-statistic: 0.71; 95% CI: 0.66 to 0.77) and UVA scores (C-statistic: 0.76; 95% CI: 0.71 to 0.81) had

**Table 3.** Performance characteristics of sepsis score across cohorts for predicting 28-day mortality stratified by site.

| Model              | Takeo, Cambodia      |         | Durham, USA          |         | Kumasi, Ghana        |         |
|--------------------|----------------------|---------|----------------------|---------|----------------------|---------|
|                    | C-statistic (95% CI) | p-value | C-statistic (95% CI) | p-value | C-statistic (95% CI) | p-value |
| <b>Age and Sex</b> | 0.68 (0.59, 0.78)    | –       | 0.68 (0.54, 0.81)    | –       | 0.57 (0.49, 0.64)    | –       |
| <b>MEWS</b>        | 0.68 (0.59, 0.78)    | 0.2102  | 0.68 (0.57, 0.79)    | 0.4991  | 0.63 (0.56, 0.70)    | 0.0097  |
| <b>NEWS</b>        | 0.73 (0.63, 0.83)    | 0.0106  | 0.71 (0.59, 0.84)    | 0.2557  | 0.64 (0.57, 0.70)    | 0.0022  |
| <b>qSOFA</b>       | 0.68 (0.59, 0.77)    | 0.5101  | 0.71 (0.54, 0.89)    | 0.0365  | 0.72 (0.64, 0.79)    | <0.001* |
| <b>SIRS</b>        | 0.69 (0.60, 0.78)    | 0.5020  | 0.69 (0.55, 0.83)    | 0.5831  | 0.58 (0.51, 0.65)    | 0.1882  |
| <b>UVA</b>         | 0.71 (0.60, 0.83)    | 0.0109  | 0.70 (0.55, 0.85)    | 0.4753  | 0.77 (0.71, 0.83)    | <0.001* |

Note: p-value are from Wald test of the adjusted Cox regression model. Each model is adjusted for age and sex. \*Significant at p<0.002

289 higher accuracy compared with MEWS (C-statistic: 0.66 (95% CI 0.61 to 0.72), NEWS (C-statistic: 0.70  
 290 (95% CI: 0.65 to 0.76), and SIRS (C-statistic: 0.61; 95% CI: 0.55 to 0.67) (**Supplementary Table S2**). In  
 291 contrast, in the United States cohort, NEWS, MEWS, SIRS, qSOFA, and UVA scores after age and sex  
 292 adjustment each had similar accuracy with C-statistics ranging from 0.66 to 0.71 (**Table 3 and**  
 293 **Supplementary Table S3**).

## 295 DISCUSSION

296 In pooled prospective international cohorts in Cambodia, Ghana, and the United States, the UVA score  
 297 and Sepsis-3 (qSOFA) performed well with a C-statistic around 0.7 for predicting 28-day mortality.  
 298 However, this improvement was largely identified in the cohort in Ghana and the accuracy was no  
 299 different than baseline risk in the Cambodia cohort. There was a trend towards improving prognostication  
 300 accuracy with the NEWS and UVA score in Cambodia and only with the qSOFA score in the United  
 301 States. These results suggest that widely used sepsis screening tools may have varying performance for  
 302 prognostication in diverse settings with different treatment regimens and aetiologies of sepsis. Therefore,  
 303 screening tools should be selected after validation within populations prior to widespread adoption.

304

1  
2  
3 305 Current sepsis screening tools have had variable performance when applied for prognostication. SOFA or  
4  
5 306 APACHE scores have been developed specifically for prognostication but required parameters including  
6  
7 307 arterial blood oxygen saturation are often not available [9]. Performance of qSOFA and SIRS for  
8  
9 308 mortality have performed poorly (SIRS, area under the receiving operator curve [AUROC], 0.61; qSOFA:  
10  
11 309 AUROC, 0.61) for prognostication in high-resource settings intensive care unit (ICU ) settings [14] and in  
12  
13 310 diverse LMICs (adjusted SIRS: AUROC, 0.59; adjusted qSOFA: AUROC, 0.70) [9] in prior studies for  
14  
15 311 mortality prognostication. While qSOFA is generally more specific than other screening tools, it is less  
16  
17 312 sensitive than SIRS, MEWS, and NEWS, which is consistent with our data[25]. When applied to sepsis  
18  
19 313 identification, Surviving Sepsis 2021 guidelines recommend against solely using qSOFA, [26] due to  
20  
21 314 being a more specific rather than sensitive screening test. Additionally, qSOFA has been found to be  
22  
23 315 inferior to MEWS, and NEWS but more accurate and specific than SIRS for predicting in-hospital  
24  
25 316 mortality and ICU transfer in a large retrospective cohort of over 30 thousand patients in the United States  
26  
27 317 (NEWS: AUROC, 0.77; MEWS: AUROC, 0.73; qSOFA: AUROC, 0.69; SIRS: AUROC, 0.65) [25].  
28  
29 318 Different screening scores have been evaluated in prospective cohorts in sub-Saharan Africa (sSA)  
30  
31 319 previously in Tanzania (qSOFA: AUROC, 0.57; MEWS: AUROC, 0.49) [27] and Rwanda [28] (MEWS:  
32  
33 320 AUROC, 0.69; UVA: AUROC, 0.71; qSOFA: AUROC, 0.65) and in Gabon [29] (UVA: AUROC, 0.90;  
34  
35 321 qSOFA: AUROC, 0.77; MEWS: AUROC, 0.72; SIRS: AUROC, 0.70). Given the performance variability  
36  
37 322 that has been previously observed and was observed in this study, it is prudent to evaluate prediction  
38  
39 323 scores within the populations they serve prior to widespread promotion.  
40  
41 324  
42  
43  
44  
45 325 The UVA score performed better than baseline risk in the Ghana cohort. Our results externally validated  
46  
47 326 the UVA score for use prognostication of hospitalized patients with suspected sepsis in Kumasi, Ghana  
48  
49 327 and potentially in the region when demographics are similar. The superiority of the UVA score in the  
50  
51 328 Ghana cohort could be related to similarities in infectious causes of illness with other countries in sub-  
52  
53 329 Saharan Africa (sSA) populations from which the UVA score was derived[12]. In contrast to the score  
54  
55 330 derivation study[12], UVA score performed similarly to qSOFA in Ghana. The accuracy of the UVA  
56  
57  
58  
59  
60

1  
2  
3 331 scores was not greater than baseline risk in the cohort in Cambodia after adjustment for multiple  
4  
5 332 comparisons. While conclusions may be limited by sample size, sepsis scores derived from the regions of  
6  
7 333 the world with more similar infectious aetiologies may perform better. Our results highlight the  
8  
9 334 importance of validating scores in new patient populations prior to widespread use.  
10

11 335  
12  
13 336 This study had multiple limitations. First, exclusion criteria of immunocompromising conditions except  
14  
15 337 HIV may have led to a skewed populations from Ghana and Cambodia. These exclusion criteria were  
16  
17 338 created to decrease the effect of comorbid conditions or medications on immune biomarkers. However, in  
18  
19 339 Cambodia and Ghana, immunosuppressive medications or diagnoses of chronic liver or kidney disease  
20  
21 340 may be less common in the general population due to limited access to specialists or specialized  
22  
23 341 medications. Additionally, while there were differences in the baseline severity between cohorts, study  
24  
25 342 processes including inclusion criteria were largely standardized across sites improving the comparability  
26  
27 343 of the cohorts in diverse settings. Diagnostic testing differed at each site and mortality specifically due to  
28  
29 344 sepsis could not be determined. Enrolment was by convenience sampling within the referral hospital  
30  
31 345 catchment area and may not be representative of the general population within these countries.  
32  
33 346 Approximation of the mental status for the MEWS scoring using GCS may not be generalizable to the use  
34  
35 347 of GCS at other sites. However, similar MEWS and NEWS performance was observed across sites.  
36  
37 348 Lastly, due to the limited sample size in each of the cohorts, smaller improvements in accuracy may not  
38  
39 349 have been identified in the Cambodia and United States cohorts that had less deaths compared to the  
40  
41 350 Ghana cohort.  
42

43 351  
44  
45 352 Inexpensive and readily available tools are needed for triage in resource-limited areas in the world to help  
46  
47 353 identify patients that need escalation and possible transfer to higher levels of care. Current widely used  
48  
49 354 sepsis screening tools represent a clinical benchmark for the development of future triage tools. Research  
50  
51 355 is ongoing to assess point-of-care diagnostics within our sepsis cohort research network. Assays with  
52  
53 356 portable and low-cost inflammation biomarkers tests, molecular diagnostics, or point-of-care ultrasound  
54  
55  
56  
57  
58  
59  
60

1  
2  
3 357 (POCUS) have the potential to augment the performance of clinical screening tools towards a more  
4  
5 358 personalized approach to sepsis recognition and triage.  
6

7 359

8  
9 360 CONCLUSION

10  
11 361 Sepsis screening tools that are widely used during clinical care had sub-optimal performance for risk  
12  
13 362 stratification in three international cohorts with increased performance of the UVA and qSOFA scores in  
14  
15 363 Ghana compared to baseline risk. There remains a need for reliable, low-cost, and scalable  
16  
17 364 prognostication methods that are validated in diverse settings.  
18

19  
20 365

21  
22 366 **Funding:** Defense Threat Reduction Agency (JSTO-CBA) to Naval Medical Research Center (NMRC)  
23  
24 367 (HDTRA1516108), Defense Health Bureau of Medicine & Surgery to NMRC for Combating Antibiotic  
25  
26 368 Resistance Bacteria (FY1819 0130.1832), Naval Medical Logistics Command Cooperative Agreement  
27  
28 369 (N626451920001).  
29

30  
31 370

32  
33  
34 371 **Conflicts of Interest:** ELT has held equity and consulted for Predigen and Biomeme, and he is an employee  
35  
36 372 of Danaher Diagnostics. All other authors declared no competing interests.  
37

38  
39 373

40  
41 374 **Ethics approval:** Study protocols were approved by the Naval Medical Research Center (NMRC)  
42  
43 375 Institutional Review Board (IRB) (Cambodia sepsis study # NMRC.2013.0019; Ghana sepsis study #  
44  
45 376 NMRC.2016.0004-GHA; Duke sepsis study Duke#PRO00054849) in compliance with all applicable  
46  
47 377 Federal regulations governing the protection of human subjects as well as host country IRBs. The study  
48  
49 378 protocol in Cambodia was approved by the Cambodian National Ethics Committee for Health Research  
50  
51 379 (NECHR). The protocol in Ghana was approved by the Committee on Human Research, Publication and  
52  
53 380 Ethics (CHRPE) at Kwame Nkrumah University of Science & Technology. All procedures were in  
54  
55  
56  
57  
58  
59  
60



1  
2  
3 381 accordance with the ethical standards of the Helsinki Declaration of the World Medical Association. All  
4  
5 382 patients, or their legally authorized representatives, provided written informed consent.  
6  
7

8 383  
9  
10 384 **Disclaimer:** K.L.S. is an employee of the US government, and C.B, N.A., C.D., M.P., and A.L. are military  
11  
12 385 service members. This work was prepared as a part of official duties. Title 17 U.S.C. 105 provides that  
13  
14 386 ‘Copyright protection under this title is not available for any work of the United States Government.’ Title  
15  
16 387 17 U.S.C. 101 defines a U.S. Government work as a work prepared by a military service member or  
17  
18 388 employee of the U.S. Government as part of a person’s official duties. The views expressed reflect the  
19  
20 389 results of research conducted by the authors and do not necessarily reflect the official policy or position of  
21  
22 390 the Department of the Navy, Department of Defense, nor the United States Government.  
23  
24

25 391  
26  
27 392 **Contributorship Statement:** PWB, RM, JB, LM, DAS, REM performed data curation and analyses. PWB,  
28  
29 393 KLS, and DVC developed the manuscript concept. DVC and KLS provided resources for research  
30  
31 394 development. AL, KLS, CO, JC, TS, ERK, ELT, CB, CWW, AF, AL, DF, JVL, MP, MR, NA, CD, MGG,  
32  
33 395 TV, AO, DA, and GO were involved in protocol development and data generation. LM, MS, WH, SK, were  
34  
35 396 involved in research operations. AL, KLS, CWW, DF, ELT, CB, DVC, and PWB were involved in  
36  
37 397 manuscript revisions. All authors reviewed and approved of this manuscript.  
38  
39

40  
41 398  
42  
43 399 **Data sharing statement:** De-identified data may be made available upon reasonable request to the  
44  
45 400 corresponding author.  
46  
47

48 401  
49  
50 402 **References**  
51  
52  
53  
54  
55  
56  
57  
58  
59

- 1  
2  
3 403 1. Reinhart K, Daniels R, Kissoon N, et al. Recognizing Sepsis as a Global Health Priority - A WHO  
4  
5 404 Resolution. *The New England journal of medicine* 2017;377(5):414-17. doi:  
6  
7 405 10.1056/NEJMp1707170 [published Online First: 2017/06/29]  
8
- 9 406 2. Rudd KE, Johnson SC, Agesa KM, et al. Global, regional, and national sepsis incidence and mortality,  
10  
11 407 1990-2017: analysis for the Global Burden of Disease Study. *Lancet (London, England)*  
12  
13 408 2020;395(10219):200-11. doi: 10.1016/s0140-6736(19)32989-7 [published Online First:  
14  
15 409 2020/01/20]
- 16  
17  
18 410 3. Maitland K, Kiguli S, Opoka RO, et al. Mortality after fluid bolus in African children with severe  
19  
20 411 infection. *The New England journal of medicine* 2011;364(26):2483-95. doi:  
21  
22 412 10.1056/NEJMoa1101549 [published Online First: 2011/05/28]
- 23  
24 413 4. Andrews B, Semler MW, Muchemwa L, et al. Effect of an Early Resuscitation Protocol on In-hospital  
25  
26 414 Mortality Among Adults With Sepsis and Hypotension: A Randomized Clinical Trial. *Jama*  
27  
28 415 2017;318(13):1233-40. doi: 10.1001/jama.2017.10913 [published Online First: 2017/10/04]
- 29  
30 416 5. WHO. Dengue: Guidelines for Diagnosis, Treatment, Prevention and Control: New Edition.  
31  
32 417 Geneva2009.
- 33  
34 418 6. Singer M, Deutschman CS, Seymour CW, et al. The Third International Consensus Definitions for  
35  
36 419 Sepsis and Septic Shock (Sepsis-3). *JAMA* 2016;315(8):801-10. doi: 10.1001/jama.2016.0287
- 37  
38 420 7. Zimmerman JE, Kramer AA, McNair DS, et al. Acute Physiology and Chronic Health Evaluation  
39  
40 421 (APACHE) IV: hospital mortality assessment for today's critically ill patients. *Critical care*  
41  
42 422 *medicine* 2006;34(5):1297-310. doi: 10.1097/01.Ccm.0000215112.84523.F0 [published Online  
43  
44 423 First: 2006/03/17]
- 45  
46 424 8. Singer M, Deutschman CS, Seymour CW, et al. The Third International Consensus Definitions for  
47  
48 425 Sepsis and Septic Shock (Sepsis-3). *Jama* 2016;315(8):801-10. doi: 10.1001/jama.2016.0287  
49  
50 426 [published Online First: 2016/02/24]
- 51  
52  
53 427 9. Rudd KE, Seymour CW, Aluisio AR, et al. Association of the Quick Sequential (Sepsis-Related)  
54  
55 428 Organ Failure Assessment (qSOFA) Score With Excess Hospital Mortality in Adults With

- 1  
2  
3 429 Suspected Infection in Low- and Middle-Income Countries. *Jama* 2018;319(21):2202-11. doi:  
4  
5 430 10.1001/jama.2018.6229 [published Online First: 2018/05/26]  
6  
7 431 10. Subbe CP, Kruger M, Rutherford P, et al. Validation of a modified Early Warning Score in medical  
8  
9 432 admissions. *Qjm* 2001;94(10):521-6. doi: 10.1093/qjmed/94.10.521 [published Online First:  
10  
11 433 2001/10/06]  
12  
13 434 11. Smith GB, Prytherch DR, Meredith P, et al. The ability of the National Early Warning Score (NEWS)  
14  
15 435 to discriminate patients at risk of early cardiac arrest, unanticipated intensive care unit admission,  
16  
17 436 and death. *Resuscitation* 2013;84(4):465-70. doi: 10.1016/j.resuscitation.2012.12.016 [published  
18  
19 437 Online First: 2013/01/09]  
20  
21 438 12. Moore CC, Hazard R, Saulters KJ, et al. Derivation and validation of a universal vital assessment  
22  
23 439 (UVA) score: a tool for predicting mortality in adult hospitalised patients in sub-Saharan Africa.  
24  
25 440 *BMJ global health* 2017;2(2):e000344. doi: 10.1136/bmjgh-2017-000344 [published Online First:  
26  
27 441 2017/10/31]  
28  
29 442 13. Adegbite BR, Edoa JR, Ndzebe Ndoumba WF, et al. A comparison of different scores for diagnosis  
30  
31 443 and mortality prediction of adults with sepsis in Low-and-Middle-Income Countries: a systematic  
32  
33 444 review and meta-analysis. *EClinicalMedicine* 2021;42:101184. doi:  
34  
35 445 10.1016/j.eclinm.2021.101184 [published Online First: 2021/11/13]  
36  
37 446 14. Raith EP, Udy AA, Bailey M, et al. Prognostic Accuracy of the SOFA Score, SIRS Criteria, and  
38  
39 447 qSOFA Score for In-Hospital Mortality Among Adults With Suspected Infection Admitted to the  
40  
41 448 Intensive Care Unit. *Jama* 2017;317(3):290-300. doi: 10.1001/jama.2016.20328 [published  
42  
43 449 Online First: 2017/01/24]  
44  
45 450 15. Krishnan S, Beckett C, Espinosa B, et al. Austere environments Consortium for Enhanced Sepsis  
46  
47 451 Outcomes (ACESO). *Shock (Augusta, Ga)* 2020;53(3):377-78. doi:  
48  
49 452 10.1097/shk.0000000000001450 [published Online First: 2019/10/01]  
50  
51  
52  
53  
54  
55  
56  
57  
58  
59  
60

- 1  
2  
3 453 16. Schully KL, Berjohn CM, Prouty AM, et al. Melioidosis in lower provincial Cambodia: A case series  
4  
5 454 from a prospective study of sepsis in Takeo Province. *PLoS neglected tropical diseases*  
6  
7 455 2017;11(9):e0005923. doi: 10.1371/journal.pntd.0005923  
8  
9 456 17. Rozo M, Schully KL, Philipson C, et al. An Observational Study of Sepsis in Takeo Province  
10  
11 457 Cambodia: An in-depth examination of pathogens causing severe infections. *PLoS Negl Trop Dis*  
12  
13 458 2020;14(8):e0008381. doi: 10.1371/journal.pntd.0008381 [published Online First: 2020/08/18]  
14  
15 459 18. Kelly CA, Upex A, Bateman DN. Comparison of consciousness level assessment in the poisoned  
16  
17 460 patient using the alert/verbal/painful/unresponsive scale and the Glasgow Coma Scale. *Ann*  
18  
19 461 *Emerg Med* 2004;44(2):108-13. doi: 10.1016/j.annemergmed.2004.03.028 [published Online  
20  
21 462 First: 2004/07/28]  
22  
23 463 19. Nedeia D. AVPU Scale: MDApp; [Available from: <https://www.mdapp.co/avpu-scale-calculator-163/>  
24  
25 464 accessed 18 January, 2022.  
26  
27 465 20. Harrell FE, Jr, Califf RM, Pryor DB, et al. Evaluating the Yield of Medical Tests. *JAMA*  
28  
29 466 1982;247(18):2543-46. doi: 10.1001/jama.1982.03320430047030  
30  
31 467 21. Han X, Zhang Y, Shao Y. On comparing 2 correlated C indices with censored survival data. *Stat Med*  
32  
33 468 2017;36(25):4041-49. doi: 10.1002/sim.7414 [published Online First: 2017/08/02]  
34  
35 469 22. Pepe MS, Kerr KF, Longton G, et al. Testing for improvement in prediction model performance. *Stat*  
36  
37 470 *Med* 2013;32(9):1467-82. doi: 10.1002/sim.5727 [published Online First: 2013/01/09]  
38  
39 471 23. Team TRDC. R: A language environment for statistical computing. R Foundation for Statistical  
40  
41 472 Computing. 2020  
42  
43 473 24. StataCorp L. Stata statistical software: release 16 College Station. *TX StataCorp LP* 2019  
44  
45 474 25. Churpek MM, Snyder A, Han X, et al. Quick Sepsis-related Organ Failure Assessment, Systemic  
46  
47 475 Inflammatory Response Syndrome, and Early Warning Scores for Detecting Clinical  
48  
49 476 Deterioration in Infected Patients outside the Intensive Care Unit. *Am J Respir Crit Care Med*  
50  
51 477 2017;195(7):906-11. doi: 10.1164/rccm.201604-0854OC [published Online First: 2016/09/21]  
52  
53  
54  
55  
56  
57  
58  
59  
60

- 1  
2  
3 478 26. Evans L, Rhodes A, Alhazzani W, et al. Surviving sepsis campaign: international guidelines for  
4  
5 479 management of sepsis and septic shock 2021. *Intensive care medicine* 2021;47(11):1181-247.  
6  
7 480 27. Carugati M, Zhang HL, Kilonzo KG, et al. Predicting Mortality for Adolescent and Adult Patients  
8  
9 481 with Fever in Resource-Limited Settings. *Am J Trop Med Hyg* 2018;99(5):1246-54. doi:  
10 482 10.4269/ajtmh.17-0682 [published Online First: 2018/09/19]  
11  
12  
13 483 28. Klinger A, Mueller A, Sutherland T, et al. Predicting mortality in adults with suspected infection in a  
14  
15 484 Rwandan hospital: an evaluation of the adapted MEWS, qSOFA and UVA scores. *BMJ Open*  
16  
17 485 2021;11(2):e040361. doi: 10.1136/bmjopen-2020-040361 [published Online First: 2021/02/12]  
18  
19  
20 486 29. Schmedding M, Adegbite BR, Gould S, et al. A Prospective Comparison of Quick Sequential Organ  
21  
22 487 Failure Assessment, Systemic Inflammatory Response Syndrome Criteria, Universal Vital  
23  
24 488 Assessment, and Modified Early Warning Score to Predict Mortality in Patients with Suspected  
25  
26 489 Infection in Gabon. *Am J Trop Med Hyg* 2019;100(1):202-08. doi: 10.4269/ajtmh.18-0577  
27  
28 490 [published Online First: 2018/11/28]  
29  
30  
31 491

1  
2  
3  
4  
5  
6  
7  
8  
9  
10  
11  
12  
13  
14  
15  
16  
17  
18  
19  
20  
21  
22  
23  
24  
25  
26  
27  
28  
29  
30  
31  
32  
33  
34  
35  
36  
37  
38  
39  
40  
41  
42  
43  
44  
45  
46  
47  
48  
49  
50  
51  
52  
53  
54  
55  
56  
57  
58  
59  
60

**492 Figure Legends**

493 Figure 1. Enrolment flow diagram across cohorts.

494 Figure 2. Kaplan-Meier survival plot of 28-day mortality stratified by site.

495 Figure 3. The C-statistic by score overall and by cohort (adjusted for age and sex).

496  
497

For peer review only

**Kumasi, Ghana**

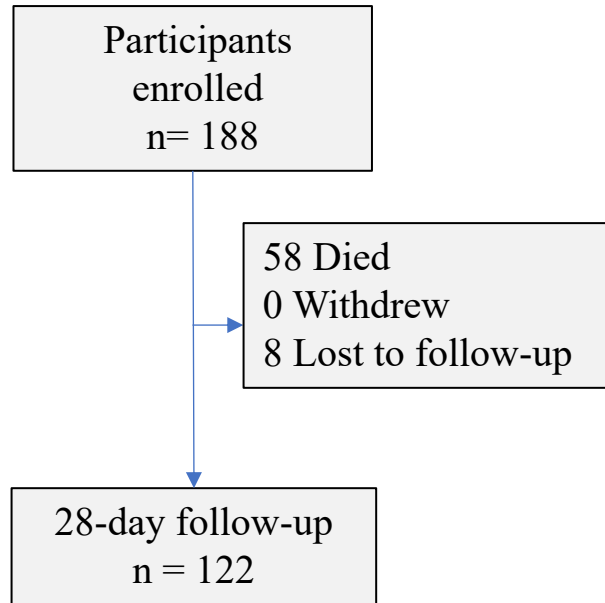

**Durham, United States**

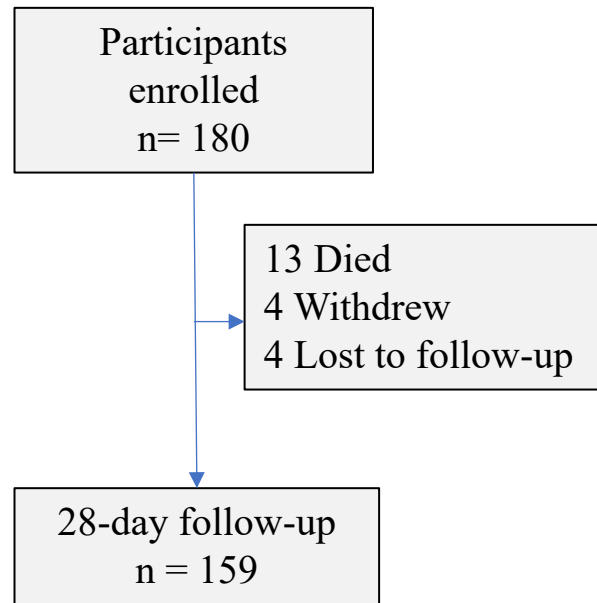

**Takeo, Cambodia**

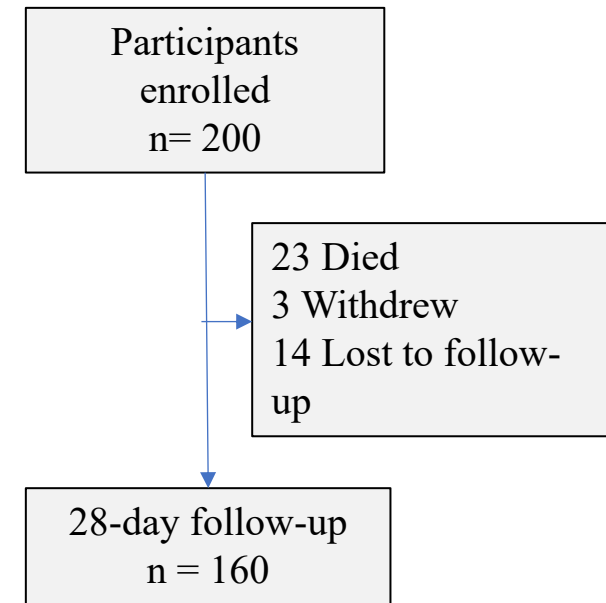

1  
2  
3  
4  
5  
6  
7  
8  
9  
10  
11  
12  
13  
14  
15  
16  
17  
18  
19  
20  
21  
22  
23  
24  
25  
26  
27  
28  
29  
30  
31  
32  
33  
34  
35  
36  
37  
38  
39  
40  
41

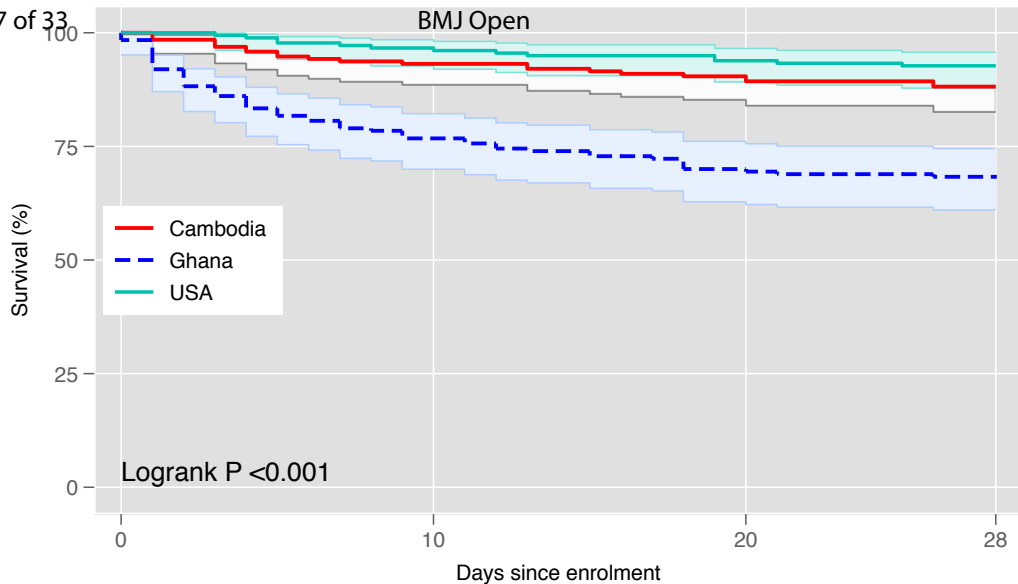

1  
2  
3  
4  
5  
6  
7  
8  
9  
10  
11  
12  
13  
14  
15  
16  
17  
18  
19  
20

No. at Risk:

|          | 0   | 5    | 10  | 15   | 20  | 25  | 28  |
|----------|-----|------|-----|------|-----|-----|-----|
| Cambodia | 200 | (13) | 171 | (5)  | 164 | (4) | 148 |
| Ghana    | 187 | (43) | 137 | (12) | 124 | (3) | 118 |
| USA      | 180 | (6)  | 173 | (5)  | 168 | (2) | 166 |

For peer review only: <http://bmjopen.bmj.com/site/about/guidelines.xhtml>



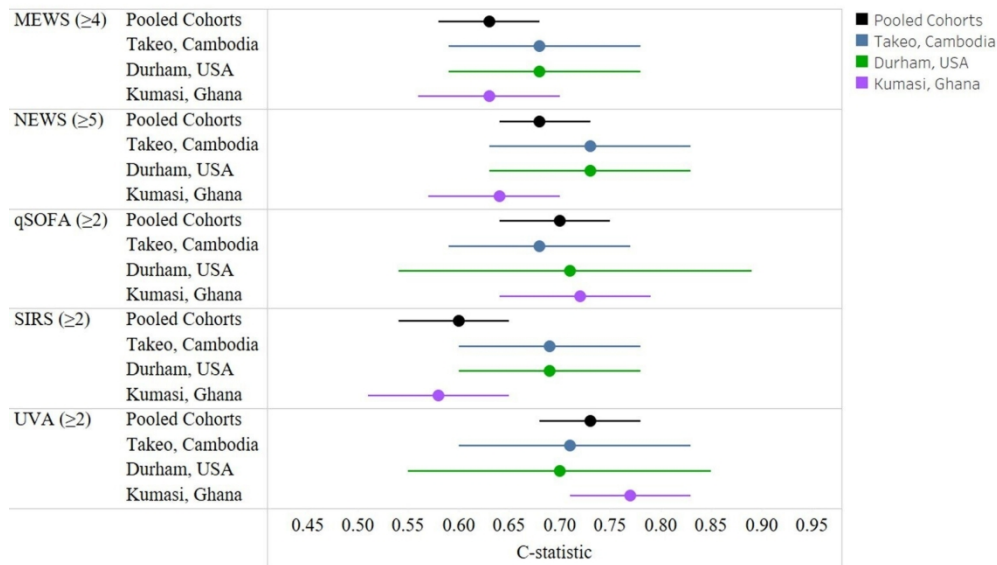

Figure 3. The C-statistic by score overall and by cohort (adjusted for age and sex).

165x96mm (800 x 800 DPI)

**Table S1.** Baseline physiologic and clinical laboratory parameters by site at enrollment.

| <b>Parameter</b>                             | <b>Total<br/>Median (IQR)</b> | <b>Takeo, Cambodia<br/>Median (IQR)</b> | <b>Durham, USA<br/>Median (IQR)</b> | <b>Kumasi, Ghana<br/>Median (IQR)</b> |
|----------------------------------------------|-------------------------------|-----------------------------------------|-------------------------------------|---------------------------------------|
| <b>Physiologic parameters</b>                |                               |                                         |                                     |                                       |
| Respiratory rate (breaths per minute)        | 24 (20, 30)                   | 24 (20, 28)                             | 24 (20, 31)                         | 26 (22, 30)                           |
| Systolic blood pressure (mmHg)               | 120 (100, 130)                | 110 (100, 130)                          | 113 (96, 129)                       | 127.5 (110, 140)                      |
| Diastolic blood pressure (mmHg)              | 70 (60, 80)                   | 70 (70, 80)                             | 64 (56, 75)                         | 80 (60, 90)                           |
| Oxygen saturation (%)                        | 97 (94, 98)                   | 98 (96, 98)                             | 95 (92, 97.5)                       | 97 (95, 98)                           |
| Temperature (°C)                             | 37.9 (37, 38.7)               | 37.5 (37, 38.5)                         | 38.1 (36.9, 38.89)                  | 38.2 (37.4, 38.8)                     |
| Heart rate (beats per minute)                | 105 (94, 118)                 | 96 (86.5, 105.5)                        | 111 (99.5, 124)                     | 111 (99, 118)                         |
| <b>Clinical laboratory parameters</b>        |                               |                                         |                                     |                                       |
| White blood cells (x10 <sup>9</sup> cells/L) | 12.05 (8.13, 16.6)            | 11.9 (8.2, 16.6)                        | 13.35 (9.7, 17.6)                   | 10.76 (7.68, 15.41)                   |
| Platelets (x10 <sup>9</sup> cells/L)         | 222 (152.5, 321.5)            | 262 (169, 366)                          | 236.5 (160, 291)                    | 193 (137, 284)                        |
| Sodium (mEq/L)                               | 135 (132, 138)                | 135 (131, 138)                          | 137 (134, 139)                      | 134 (130, 138)                        |
| Potassium (mEq/L)                            | 3.7 (3.3, 4.2)                | 3.7 (3.2, 4.1)                          | 3.9 (3.5, 4.3)                      | 3.6 (3.2, 4)                          |
| Sodium Bicarbonate (mmol/L)                  | 24 (21, 26)                   | 24 (22, 27)                             | 25 (22, 27)                         | 22 (19, 25)                           |
| Glucose (mg/dL)                              | 6.56 (5.4, 10)                | 6.44 (5.39, 8.28)                       | 6.69 (5.67, 10.06)                  | 6.65 (5.2, 12)                        |
| Blood Urea Nitrogen (mg/dL)                  | 5 (3.57, 7.9)                 | 4.29 (3.21, 5.71)                       | 5.71 (3.57, 10)                     | 5.4 (3.5, 9.4)                        |
| Creatinine (mg/dL)                           | 88.42 (66, 130)               | 79.58 (53.05, 88.42)                    | 106.1 (70.74, 150.31)               | 91 (70, 135)                          |
| Alkaline Phosphatase (U/L)                   | 86.5 (65, 132)                | 98.5 (72, 172)                          | 80 (63, 106)                        | 85 (63, 125)                          |
| Alanine Transaminase (U/L)                   | 32 (22, 58)                   | 46 (27, 86)                             | 22 (18, 40)                         | 29 (22, 48)                           |
| Aspartate Aminotransferase (U/L)             | 42 (27, 76)                   | 61 (38, 117)                            | 29 (21, 45)                         | 35.5 (25, 65)                         |
| Bilirubin (mg/dL)                            | 15 (10.26, 21)                | 13.68 (10.26, 20.52)                    | 15.39 (10.26, 20.52)                | 15 (11, 23)                           |

---

| <b>Parameter</b>     | <b>Total<br/>Median (IQR)</b> | <b>Takeo, Cambodia<br/>Median (IQR)</b> | <b>Durham, USA<br/>Median (IQR)</b> | <b>Kumasi, Ghana<br/>Median (IQR)</b> |
|----------------------|-------------------------------|-----------------------------------------|-------------------------------------|---------------------------------------|
| Albumin (g/dL)       | 3.0 (2.5, 3.5)                | 2.9 (2.5, 3.4)                          | 3.0 (2.5, 3.5)                      | 3.0 (2.3, 3.6)                        |
| Total protein (g/dL) | 73 (65, 79)                   | 74 (68, 79.5)                           | 67 (57, 72)                         | 75 (69, 83)                           |
| Lactate (mmol/L)     | 2.27 (1.66, 3.09)             | 2.33 (1.79, 3.03)                       | 1.5 (1, 2.4)                        | 2.54 (1.8, 3.42)                      |

---

*\*All variables are presented as median, interquartile range*

For peer review only

**Table S2.** Performance characteristics of sepsis score across Cambodia and Ghana sites combined for predicting 28-day mortality.

| Score                            | Sensitivity (95% CI) | Specificity (95% CI) | PPV (95% CI)       | NPV (95% CI)       | Unadjusted Bivariate Cox model C-statistic (95% CI) | Adjusted* Cox model C-statistic (95% CI) | p-value          |
|----------------------------------|----------------------|----------------------|--------------------|--------------------|-----------------------------------------------------|------------------------------------------|------------------|
| <b>Baseline</b>                  |                      |                      |                    |                    |                                                     | 0.60 (0.54 – 0.66)                       |                  |
| <b>MEWS <math>\geq 4</math></b>  | 0.74 (0.64 – 0.84)   | 0.50 (0.44 – 0.56)   | 0.28 (0.25 – 0.32) | 0.88 (0.84 – 0.92) | 0.62 (0.57 – 0.66)                                  | 0.66 (0.61 – 0.72)                       | <b>&lt;0.001</b> |
| <b>NEWS <math>\geq 5</math></b>  | 0.85 (0.75– 0.92)    | 0.46 (0.38– 0.52)    | 0.33 (0.29– 0.36)  | 0.91 (0.85 – 0.94) | 0.65 (0.62 – 0.70)                                  | 0.70 (0.65 – 0.76)                       | <b>0.001</b>     |
| <b>qSOFA <math>\geq 2</math></b> | 0.54 (0.42 – 0.65)   | 0.84 (0.80 – 0.88)   | 0.47 (0.39 – 0.55) | 0.87 (0.84 – 0.90) | 0.67 (0.62 – 0.73)                                  | 0.71 (0.66– 0.77)                        | <b>&lt;0.001</b> |
| <b>SIRS <math>\geq 2</math></b>  | 0.88 (0.78 = 0.94)   | 0.24 (0.19 (0.30)    | 0.23 (0.21 – 0.24) | 0.89 (0.81 – 0.94) | 0.55 (0.51 – 0.59)                                  | 0.61 (0.55 – 0.67)                       | 0.066            |
| <b>UVA <math>\geq 2</math></b>   | 0.75 (0.65 – 0.84)   | 0.74 (0.70 – 0.80)   | 0.45 (0.40 – 0.52) | 0.92 (0.88 – 0.94) | 0.73 (0.68 – 0.77)                                  | 0.76 (0.71– 0.81)                        | <b>&lt;0.001</b> |

**Table S3.** Performance characteristics of sepsis score across the United States site for predicting 28-day mortality.

| Score                               | Sensitivity<br>(95% CI) | Specificity<br>(95% CI) | PPV<br>(95% CI)       | NPV<br>(95% CI)      | Unadjusted<br>Bivariate<br>Cox model<br>C-statistic<br>(95% CI) | Adjusted*<br>Cox model<br>C-statistic<br>(95% CI) | p-value |
|-------------------------------------|-------------------------|-------------------------|-----------------------|----------------------|-----------------------------------------------------------------|---------------------------------------------------|---------|
| <b>Baseline<br/>(age +sex)</b>      |                         |                         |                       |                      |                                                                 | 0.61 (0.52 –<br>0.66)                             |         |
| <b>MEWS<math>\geq</math>4</b>       | 0.60 (0.26-<br>0.87)    | 0.33 (0.26<br>–0.41)    | 0.05 (0.03<br>–0.09)  | 0.92 (0.85<br>–0.96) | 0.53 (0.38 –<br>0.67)                                           | 0.68 (0.57 –<br>0.79)                             | 0.743   |
| <b>NEWS<math>\geq</math>5</b>       | 0.90 (0.56 –<br>0.99)   | 0.37 (0.29<br>–0.45)    | 0.09 (0.07<br>–0.11)  | 0.98 (0.89-<br>0.99) | 0.63 (0.54 -<br>0.71)                                           | 0.71 (0.59-<br>0.84)                              | 0.256   |
| <b>qSOFA<br/><math>\geq</math>2</b> | 0.60 (0.26 -<br>87)     | 0.72 (0.65<br>–0.79)    | 0.13 (0.08<br>- 0.20) | 0.96 (0.93<br>–0.98) | 0.66 (0.51 –<br>0.81)                                           | 0.71 (0.54 –<br>0.89)                             | 0.019   |
| <b>SIRS <math>\geq</math>2</b>      | 0.92 (0.64 -<br>0.99)   | 0.11 (0.07<br>–0.16)    | 0.08 (0.07<br>–0.09)  | 0.94 (0.72<br>–0.99) | 0.51 (0.45 –<br>0.58)                                           | 0.66 (0.54 –<br>0.82)                             | 0.694   |
| <b>UVA<math>\geq</math>2</b>        | 0.60 (0.26 –<br>0.88)   | 0.58 (0.50<br>–0.66)    | 0.09 (0.05<br>-0.14)  | 0.95 (0.90<br>-0.98) | 0.59 (0.44 –<br>0.73)                                           | 0.70 (0.50 –<br>0.87)                             | 0.281   |

1  
2  
3  
4  
5  
6  
7  
8  
9  
10  
11  
12  
13  
14  
15  
16  
17  
18  
19  
20  
21  
22  
23  
24  
25  
26  
27  
28  
29  
30  
31  
32  
33  
34  
35  
36  
37  
38  
39  
40  
41  
42  
43  
44  
45  
46  
47  
48  
49  
50  
51  
52  
53  
54  
55  
56  
57  
58  
59  
60



**Supplementary Figure S1.** Distribution of adjudicated pathogen class for each site.

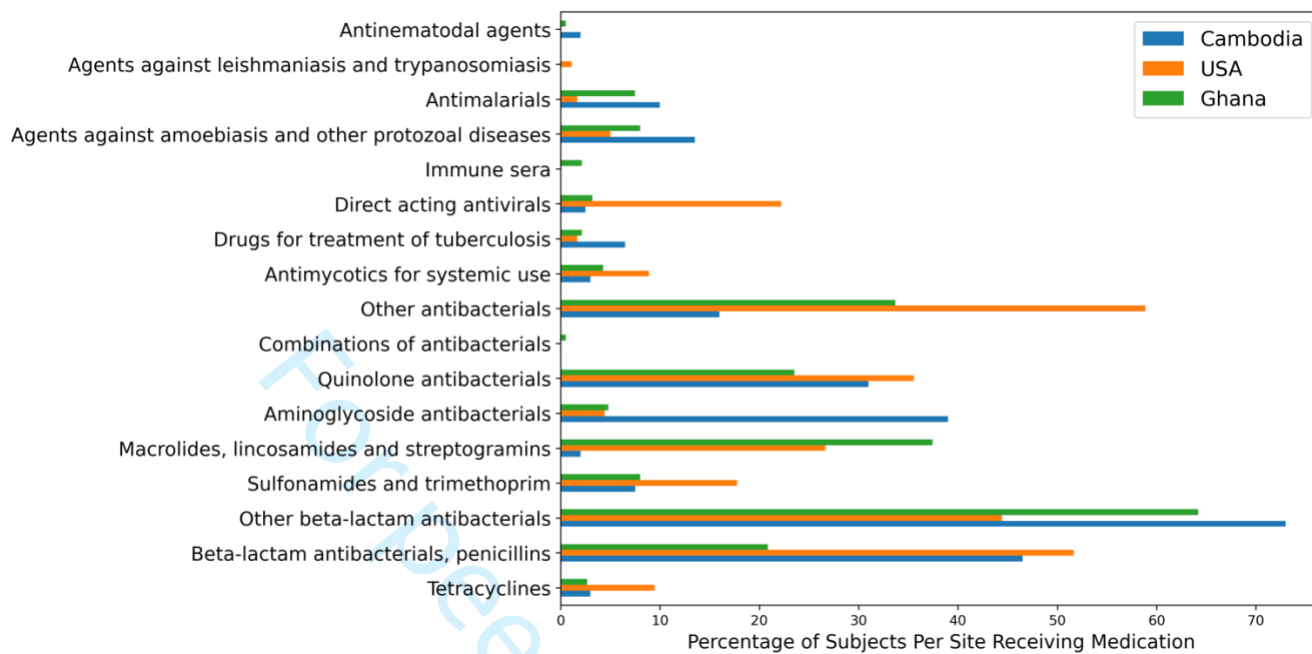

**Supplementary Figure S2.** Prevalence of antibiotics received per site.

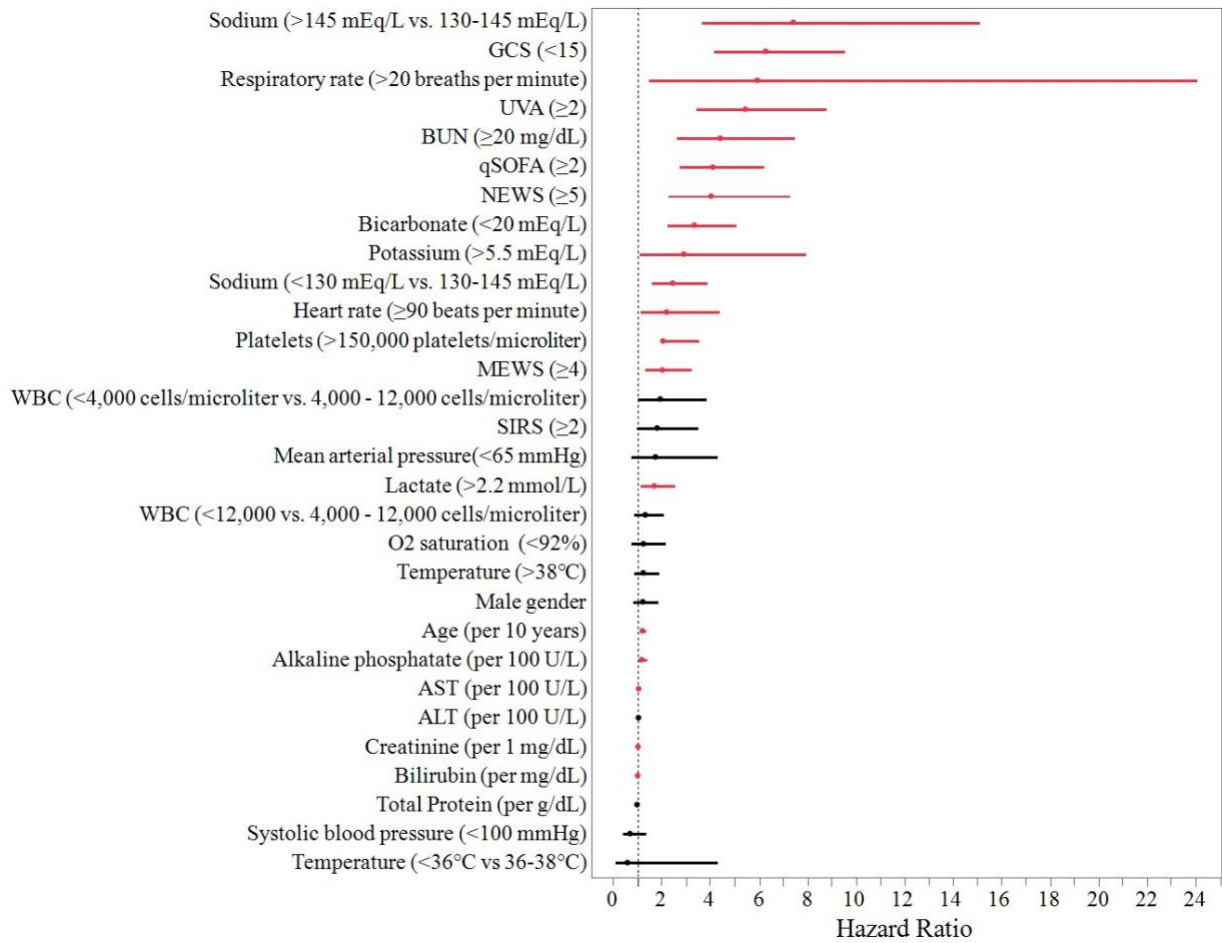

**Supplementary Figure S3.** Forest plot of hazard ratios from bivariate Cox regression models for risk of death at 28-day for sepsis scores, physiologic parameters, and clinical laboratory parameters.



# BMJ Open

## Screening tools for predicting mortality of adults with suspected sepsis: an international sepsis cohort validation study

|                               |                                                                                                                                                                                                                                                                                                                                                                                                                                                                                                                                                                                                                                                                                                                                                                                                                                                                                                                                                                                                                                                                                                                                                                                                                                                                                                                                                                                                                                                                                                                                                                                                                                                                                                                                                                                                                                                                                                                                                                                                                                                                                                   |
|-------------------------------|---------------------------------------------------------------------------------------------------------------------------------------------------------------------------------------------------------------------------------------------------------------------------------------------------------------------------------------------------------------------------------------------------------------------------------------------------------------------------------------------------------------------------------------------------------------------------------------------------------------------------------------------------------------------------------------------------------------------------------------------------------------------------------------------------------------------------------------------------------------------------------------------------------------------------------------------------------------------------------------------------------------------------------------------------------------------------------------------------------------------------------------------------------------------------------------------------------------------------------------------------------------------------------------------------------------------------------------------------------------------------------------------------------------------------------------------------------------------------------------------------------------------------------------------------------------------------------------------------------------------------------------------------------------------------------------------------------------------------------------------------------------------------------------------------------------------------------------------------------------------------------------------------------------------------------------------------------------------------------------------------------------------------------------------------------------------------------------------------|
| Journal:                      | <i>BMJ Open</i>                                                                                                                                                                                                                                                                                                                                                                                                                                                                                                                                                                                                                                                                                                                                                                                                                                                                                                                                                                                                                                                                                                                                                                                                                                                                                                                                                                                                                                                                                                                                                                                                                                                                                                                                                                                                                                                                                                                                                                                                                                                                                   |
| Manuscript ID                 | bmjopen-2022-067840.R2                                                                                                                                                                                                                                                                                                                                                                                                                                                                                                                                                                                                                                                                                                                                                                                                                                                                                                                                                                                                                                                                                                                                                                                                                                                                                                                                                                                                                                                                                                                                                                                                                                                                                                                                                                                                                                                                                                                                                                                                                                                                            |
| Article Type:                 | Original research                                                                                                                                                                                                                                                                                                                                                                                                                                                                                                                                                                                                                                                                                                                                                                                                                                                                                                                                                                                                                                                                                                                                                                                                                                                                                                                                                                                                                                                                                                                                                                                                                                                                                                                                                                                                                                                                                                                                                                                                                                                                                 |
| Date Submitted by the Author: | 09-Jan-2023                                                                                                                                                                                                                                                                                                                                                                                                                                                                                                                                                                                                                                                                                                                                                                                                                                                                                                                                                                                                                                                                                                                                                                                                                                                                                                                                                                                                                                                                                                                                                                                                                                                                                                                                                                                                                                                                                                                                                                                                                                                                                       |
| Complete List of Authors:     | <p>Blair, Paul; Henry M Jackson Foundation for the Advancement of Military Medicine Inc, Austere environments Consortium for Enhanced Sepsis Outcomes (ACESO)</p> <p>Mehta, Rittal; Henry M Jackson Foundation for the Advancement of Military Medicine Inc</p> <p>Oppong, Chris; Komfo Anokye Teaching Hospital, Emergency Medicine</p> <p>Tin, Som; Takeo Provincial Referral Hospital</p> <p>Ko, Emily; Duke University School of Medicine</p> <p>Tsalik, Ephraim ; Duke University School of Medicine</p> <p>Chenoweth, Josh; Henry M Jackson Foundation for the Advancement of Military Medicine Inc</p> <p>Rozo, Michelle; Henry M Jackson Foundation for the Advancement of Military Medicine Inc</p> <p>Adams, Nehkonti; Naval Medical Research Center Infectious Diseases Directorate</p> <p>Beckett, Charmagne; Naval Medical Research Center Infectious Diseases Directorate</p> <p>Woods, Christopher; Duke University School of Medicine; Duke Global Health Institute</p> <p>Striegel, Deborah; Henry M Jackson Foundation for the Advancement of Military Medicine Inc</p> <p>Salvador, Mark G; Henry M Jackson Foundation for the Advancement of Military Medicine Inc</p> <p>Brandsma, Joost; Henry M Jackson Foundation for the Advancement of Military Medicine Inc</p> <p>McKean, Lauren; Henry M Jackson Foundation for the Advancement of Military Medicine Inc</p> <p>Mahle, Rachael; Duke University School of Medicine</p> <p>Hulsey, William R; Henry M Jackson Foundation for the Advancement of Military Medicine Inc</p> <p>Krishnan, Subramaniam; Henry M Jackson Foundation for the Advancement of Military Medicine Inc</p> <p>Prouty, Michael; US Naval Medical Research Unit No 2</p> <p>Letizia, Andrew; Naval Medical Research Unit-3 Ghana Detachment</p> <p>Fox, Anne; Naval Medical Research Unit-3 Ghana Detachment</p> <p>Faix, Dennis; US Naval Medical Research Unit No 2</p> <p>Lawler, James V; University of Nebraska Medical Center, Global Center for Health Security; University of Nebraska Medical Center, Department of Internal Medicine</p> |

|                                 |                                                                                                                                                                                                                                                                                                                                                                                                                                                                                                                                                                                                                                                                                                                                                                                 |
|---------------------------------|---------------------------------------------------------------------------------------------------------------------------------------------------------------------------------------------------------------------------------------------------------------------------------------------------------------------------------------------------------------------------------------------------------------------------------------------------------------------------------------------------------------------------------------------------------------------------------------------------------------------------------------------------------------------------------------------------------------------------------------------------------------------------------|
|                                 | Duplessis, Chris; Austere environments Consortium for Enhanced Sepsis Outcomes (ACESO), Biological Defense Research Directorate, Naval Medical Research Center-Frederick<br>Gregory, Michael; Austere environments Consortium for Enhanced Sepsis Outcomes (ACESO), Biological Defense Research Directorate, Naval Medical Research Center-Frederick<br>Vantha, Te; Takeo Provincial Referral Hospital<br>Owusu-Ofori, Alex Kwame; Komfo Anokye Teaching Hospital<br>Ansong, Daniel; Komfo Anokye Teaching Hospital, Emergency Medicine<br>Oduro, George; Komfo Anokye Teaching Hospital<br>Schully, Kevin; Henry M Jackson Foundation for the Advancement of Military Medicine Inc<br>Clark, Danielle; Henry M Jackson Foundation for the Advancement of Military Medicine Inc |
| <b>Primary Subject Heading</b>: | Global health                                                                                                                                                                                                                                                                                                                                                                                                                                                                                                                                                                                                                                                                                                                                                                   |
| Secondary Subject Heading:      | Intensive care, Infectious diseases, Evidence based practice                                                                                                                                                                                                                                                                                                                                                                                                                                                                                                                                                                                                                                                                                                                    |
| Keywords:                       | INFECTIOUS DISEASES, Adult intensive & critical care < INTENSIVE & CRITICAL CARE, Epidemiology < INFECTIOUS DISEASES, Tropical medicine < INFECTIOUS DISEASES, Public health < INFECTIOUS DISEASES                                                                                                                                                                                                                                                                                                                                                                                                                                                                                                                                                                              |
|                                 |                                                                                                                                                                                                                                                                                                                                                                                                                                                                                                                                                                                                                                                                                                                                                                                 |

SCHOLARONE™  
Manuscripts



I, the Submitting Author has the right to grant and does grant on behalf of all authors of the Work (as defined in the below author licence), an exclusive licence and/or a non-exclusive licence for contributions from authors who are: i) UK Crown employees; ii) where BMJ has agreed a CC-BY licence shall apply, and/or iii) in accordance with the terms applicable for US Federal Government officers or employees acting as part of their official duties; on a worldwide, perpetual, irrevocable, royalty-free basis to BMJ Publishing Group Ltd ("BMJ") its licensees and where the relevant Journal is co-owned by BMJ to the co-owners of the Journal, to publish the Work in this journal and any other BMJ products and to exploit all rights, as set out in our [licence](#).

The Submitting Author accepts and understands that any supply made under these terms is made by BMJ to the Submitting Author unless you are acting as an employee on behalf of your employer or a postgraduate student of an affiliated institution which is paying any applicable article publishing charge ("APC") for Open Access articles. Where the Submitting Author wishes to make the Work available on an Open Access basis (and intends to pay the relevant APC), the terms of reuse of such Open Access shall be governed by a Creative Commons licence – details of these licences and which [Creative Commons](#) licence will apply to this Work are set out in our licence referred to above.

Other than as permitted in any relevant BMJ Author's Self Archiving Policies, I confirm this Work has not been accepted for publication elsewhere, is not being considered for publication elsewhere and does not duplicate material already published. I confirm all authors consent to publication of this Work and authorise the granting of this licence.

1  
2  
3 1 **Title:** Screening tools for predicting mortality of adults with suspected sepsis: an international sepsis  
4 cohort validation study

5 2  
6  
7 3 **Authors:** Paul W. Blair<sup>1,2\*</sup>, Rittal Mehta<sup>1</sup>, Chris Oppong<sup>3</sup>, Tin Som<sup>4</sup>, Emily R. Ko<sup>5</sup>, Ephraim L. Tsalik<sup>5</sup>,  
8 Josh Chenoweth<sup>1</sup>, Michelle Rozo<sup>1</sup>, Nehkonti Adams<sup>6</sup>, Charmagne Beckett<sup>6</sup>, Christopher W. Woods<sup>5</sup>,  
9 Deborah A. Striegel<sup>1</sup>, Mark Salvador<sup>1</sup>, Joost Brandsma<sup>1</sup>, Lauren McKean<sup>1</sup>, Rachael E. Mahle<sup>5</sup>, William  
10 Hulsey<sup>1</sup>, Subramaniam Krishnan<sup>1</sup>, Michael Prouty<sup>7</sup>, Andrew Letizia<sup>8</sup>, Anne Fox<sup>8</sup>, Dennis Faix<sup>7</sup>, James V.  
11 Lawler<sup>9</sup>, Chris Duplessis<sup>10</sup>; Michael G Gregory<sup>10</sup>, Te Vantha<sup>4</sup>, Alex Owusu-Ofori<sup>3</sup>, Daniel Ansong<sup>3</sup>,  
12 George Oduro<sup>3</sup>, Kevin L. Schully<sup>1,10</sup>, and Danielle V. Clark<sup>1</sup>.

13  
14  
15  
16  
17  
18  
19  
20  
21 9 **Affiliation:**

22  
23 10 <sup>1</sup>Austere environments Consortium for Enhanced Sepsis Outcomes (ACESO), Henry M. Jackson  
24 Foundation for the Advancement of Military Medicine, Inc., Bethesda, MD, United States of America.  
25 11 <sup>2</sup>Johns Hopkins University School of Medicine, MD, United States of America. <sup>3</sup>Komfo Anokye  
26 Teaching Hospital, Kumasi, Ghana. <sup>4</sup>Takeo Provincial Referral Hospital, Takeo, Cambodia. <sup>5</sup>Duke  
27 University Division of Infectious Diseases, Duke University School of Medicine, Durham, NC, USA.  
28 12 <sup>6</sup>Naval Medical Research Center Infectious Diseases Directorate, Bethesda, MD. <sup>7</sup>Naval Medical  
29 Research Unit-2, Phnom Penh, Cambodia. <sup>8</sup>Naval Medical Research Unit-3 Ghana Detachment, Accra,  
30 Ghana. <sup>9</sup>Global Center for Health Security at Nebraska and Division of Infectious Disease, Department of  
31 Internal Medicine, University of Nebraska Medical Center, Omaha, NE, United States of America.  
32 13 <sup>10</sup>Austere environments Consortium for Enhanced Sepsis Outcomes (ACESO), Biological Defense  
33 Research Directorate, Naval Medical Research Center-Frederick, Ft. Detrick, MD, United States of  
34 America  
35 21

36  
37 22

38  
39 23

40  
41 24

42  
43 25

44  
45 26

46  
47 27

48  
49 28

50  
51  
52 29 **\*Corresponding Author:** Paul W. Blair, MD MSPH MHS. Henry M. Jackson Foundation for the  
53 Advancement of Military Medicine. 6720A Rockledge Dr, Bethesda, MD 20817. E-mail:

54 30  
55  
56 31 [pblair6@jhmi.edu](mailto:pblair6@jhmi.edu)

32

**Abstract:**

Word count: 276

**Objectives:** We evaluated the performance of commonly used sepsis screening tools across prospective sepsis cohorts in the United States, Cambodia, and Ghana.

**Design:** Prospective cohort studies

**Setting and participants:** From 2014 to 2021, participants with 2 or more SIRS (Systemic Inflammatory Response Syndrome) criteria and suspected infection were enrolled in emergency departments and medical wards at hospitals in the Cambodia and Ghana and hospitalized participants with suspected infection were enrolled in the United States. Cox proportional hazards regression was performed, and Harrell's C-statistic calculated to determine 28-day mortality prediction performance of the qSOFA score  $\geq 2$ , SIRS score  $\geq 3$ , NEWS  $\geq 5$ , MEWS  $\geq 5$ , or UVA score  $\geq 2$ . Screening tools were compared to baseline risk (age and sex) with the Wald test.

**Results:** The cohorts included 567 participants (42.9% female) including 187 participants from Kumasi, Ghana, 200 participants from Takeo, Cambodia, and 180 participants from Durham, North Carolina in the United States. The pooled mortality was 16.4% at 28-days. The mortality prediction accuracy increased from baseline risk with the MEWS (C-statistic: 0.63, 95% CI: 0.58, 0.68;  $p=0.002$ ), NEWS (C-statistic: 0.68; 95% confidence interval [CI]: 0.64, 0.73;  $p<0.001$ ), qSOFA (C-statistic: 0.70, 95% CI: 0.64, 0.75;  $p<0.001$ ), UVA score (C-statistic: 0.73, 95% CI: 0.69, 0.78;  $p<0.001$ ), but not with SIRS (0.60; 95% CI: 0.54, 0.65;  $p=0.13$ ). Within individual cohorts, only the UVA score in Ghana performed better than baseline risk (C-statistic: 0.77; 95% CI: 0.71, 0.83;  $p<0.001$ ).

**Conclusions:** Among the cohorts, MEWS, NEWS, qSOFA, and UVA scores performed better than baseline risk, largely driven by accuracy improvements in Ghana, while SIRS scores did not improve prognostication accuracy. Prognostication scores should be validated within the target population prior to clinical use.

**Keywords:** Analysis, Survival; sepsis; Cohort Studies; Prognosis; Global Health

1  
2  
3 58  
45 59 **Strengths and limitations of this study:**  
6

- 7 60 • This study includes two well-characterized sepsis cohorts in low- and middle-income countries  
8 (LMICs) and a cohort in a high-resource setting for comparison.  
9  
10 61  
11  
12 62 • The performance characteristics of five commonly used sepsis screening tools for predicting 28-  
13 day death was compared to baseline risk after adjustment for multiple comparisons.  
14 63  
15  
16 64 • Diagnostic testing differed at each site and mortality specifically due to sepsis could not be  
17 determined.  
18 65  
19  
20 66 • Enrolment was by convenience sampling within the referral hospital catchment area and may not  
21 be representative of the general population within these countries.  
22 67  
23  
24 68 • Sample size limitations in each of the cohorts may have led to decreased ability to identify  
25 differences between each screening tool.  
26 69  
27  
28  
29 70  
30  
31 71

32  
33 72 **Narrative:**  
3435 73 Word count: 3,883  
36  
37 74  
3839 75 INTRODUCTION  
40

41 76 Sepsis, a syndrome resulting from a systemic dysregulated host response to an infection, is estimated to  
42 cause six million deaths per year but is likely an underestimate due to limited information from low- and  
43 middle-income countries (LMICs) where 87% of the world population live [1]. Despite declining age-  
44 standardized incidence and mortality, sepsis remains a major cause of health loss worldwide and has an  
45 especially high health-related burden in LMICs[2].  
46 78  
47 79  
48 80  
49  
50  
51

52 81  
53  
54  
55  
56  
57  
58  
59  
60

1  
2  
3 82 Clinical sepsis guidelines developed in the Western world may not be applicable in resource-limited settings  
4  
5 83 and moreover can lead to detrimental effects on sepsis care and management when applied in these  
6  
7 84 conditions due to decreased access to resources to manage iatrogenesis from fluid resuscitation [3, 4]. In  
8  
9 85 contrast to the United States, pathogens that lead to directly lead to vascular injury are common causes of  
10  
11 86 acute febrile illness in Cambodia and Ghana such as dengue virus, malaria, or rickettsia and may alter  
12  
13 87 empiric treatment response [5]. While early recognition and treatment of sepsis is critical, most sepsis scores  
14  
15 88 or early warning systems were derived from cohorts outside of LMICs. Differences in causes of sepsis,  
16  
17 89 available treatments, and available resources for supportive care should affect management strategies but  
18  
19 90 evidence is limited and optimal clinical scores or biomarkers for sepsis identification are unknown in these  
20  
21 91 settings. Multi-site international sepsis studies are essential for evaluating current and future sepsis tools to  
22  
23 92 ensure effectiveness in resource-limited settings and across populations.  
24  
25

26 93  
27  
28 94 The most validated prognostication scores, SOFA (Sequential Organ Failure Assessment) and the  
29  
30 95 APACHE IV, have been developed for prognostication but require an arterial blood gas and multiple  
31  
32 96 laboratory parameters [6, 7] that are not widely available in low-resource settings. The qSOFA (quick  
33  
34 97 SOFA) is an abbreviated score that does not require laboratory parameters. The qSOFA is one of the most  
35  
36 98 widely adopted sepsis screening tools and has largely replaced the SIRS (Systemic Inflammatory Response  
37  
38 99 Syndrome) criteria as the standard abbreviated sepsis screening tool as part of the Sepsis-3 definition to  
39  
40 100 identify septic patients [8]. The qSOFA and other sepsis screening tools (i.e., Modified Early Warning  
41  
42 101 Score [MEWS], National Early Warning Score [NEWS], and Universal Vital Assessment [UVA]) are often  
43  
44 102 used clinically to identify those at risk of sepsis, but these tools have been studied for their ability to  
45  
46 103 prognosticate mortality or poor composite outcomes among hospitalized adults[9-12]. Studies have  
47  
48 104 evaluated these tools for predicting in-hospital mortality but the performance of these tools and the  
49  
50 105 prevalence of 28-day mortality, a common metric of sepsis outcomes, have yet to be described across both  
51  
52 106 high- and low-resource settings using similar methods [9, 13, 14].  
53  
54  
55

56 107  
57  
58  
59  
60

1  
2  
3 108 We used prospective multi-site international cohorts that are part of the Austere environments Consortium  
4  
5 109 for Enhanced Sepsis Outcomes (ACESO) consortium to validate commonly used sepsis screening tools  
6  
7 110 [15]. In contrast to APACHE IV and SOFA, these tools can be quickly performed with limited laboratory  
8  
9 111 test results. We hypothesized that qSOFA may perform poorly in LMIC populations compared to the UVA  
10  
11 112 score due to differences in causes of sepsis. We describe the diverse clinical characteristics, the aetiologies  
12  
13 113 of suspected sepsis within these cohorts, and the performance of sepsis screening tools in current clinical  
14  
15 114 use for predicting mortality at one month post enrolment.  
16  
17  
18 115

## 19 20 116 METHODS

21  
22 117 From May 2014 to November 2015, 200 participants were enrolled into a prospective observational study  
23  
24 118 of sepsis at Takeo Provincial Hospital in Takeo Province Cambodia [16] (Figure 1). This study was  
25  
26 119 followed by a prospective study at Duke University Hospital in Durham, North Carolina, which enrolled  
27  
28 120 180 participants from December 2014 to March 2016. In Kumasi, Ghana, 187 participants were enrolled at  
29  
30 121 Komfo Anokye Teaching Hospital from July 2016 to October 2017.  
31  
32  
33

34 122 Hospitalized patients  $\geq 18$  years of age whose attending physician judged them to have an active infection  
35  
36 123 were considered for inclusion for each of the three cohorts. Additional inclusion and exclusion criteria  
37  
38 124 were required in Cambodia and Ghana but not required in the United States protocol. In Cambodia and  
39  
40 125 Ghana, participants were required to meet least two clinical criteria for systemic inflammatory response  
41  
42 126 syndrome (SIRS) during screening. In Cambodia and Ghana, patients were excluded if they had known  
43  
44 127 malignancy, chronic renal/hepatic insufficiency, immunosuppressive conditions (except HIV) or systemic  
45  
46 128 steroid usage that exceeded 20mg/day to prevent confounding in future biomarker studies. Patients were  
47  
48 129 also excluded in Cambodia and Ghana if they had a history of organ transplant, hemodynamically  
49  
50 130 significant gastrointestinal bleeding, anatomic or functional asplenia, acute cardiovascular disease,  
51  
52 131 general anaesthesia, or surgery in the past week prior to enrolment, women who were pregnant, patients  
53  
54  
55  
56  
57  
58  
59  
60



1  
2  
3 132 who had a haemoglobin less than 7 g/dL or weighed less than 35kg. Hospital physicians who deemed  
4  
5 133 their patients too ill to participate could defer enrolment.  
6  
7

8 134 *Study procedures*  
9

10 135 Following informed consent, study team members conducted a detailed medical history, including prior  
11  
12 136 medications, and physical exam. Responses were recorded on a standardized case report form and  
13  
14 137 included demographics, medical history, physical exam findings, and admission diagnoses. Study specific  
15  
16 138 procedures conducted in Cambodia were described in detail by Rozo et al [17]. Similar enrolment and  
17  
18 139 study procedures were followed in Kumasi, Ghana and in Durham, North Carolina, USA. Blood was  
19  
20 140 collected at the time of enrolment, then at 6 hours later, and at 24 hours later. In Ghana and Cambodia,  
21  
22 141 standardized clinical tests included a peripheral venous blood gas with lactate, complete blood count,  
23  
24 142 complete metabolic panel, optional HIV screening with consent (Alere Determine HIV1/2, Abbott, OK,  
25  
26 143 United States), malaria rapid diagnostic tests (SD Bioline Ag. P.f./Pan, Abbott, OK, United States) and  
27  
28 144 aerobic blood cultures (one aerobic bottle, Bactec 9050, BD, NJ, United States) as part of study  
29  
30 145 procedures in Ghana and Cambodia. Microbiologic results were available if collected through routine  
31  
32 146 clinical care across cohorts. Additional molecular testing and next generation sequencing for pathogens  
33  
34 147 were also performed on blood samples in the Cambodia cohort as previously described [17]. Participants  
35  
36 148 were followed throughout their hospitalization and a record review performed at discharge.  
37  
38  
39  
40

41 149 An interview was performed, and blood samples were collected at a 28-day follow-up visit across cohorts.  
42  
43 150 When patients could not return in person, study team members attempted to conduct an interview with  
44  
45 151 patients or a legally authorized representative by telephone. Fatal outcomes among each discharged  
46  
47 152 participant were also determined.  
48  
49  
50

51 153 Using clinical data from case report forms and microbiology diagnostic information, clinical adjudication  
52  
53 154 was performed by three physician reviewers (internal medicine or infectious diseases) to determine the  
54  
55 155 source of infection by anatomic location and pathogen class (i.e., bacterial, parasitic, viral, or fungal).  
56  
57  
58  
59  
60

1  
2  
3 156 This was graded on a low, moderate, and high level of confidence by two independent reviewers and a  
4  
5 157 third reviewer served as a tiebreaker for discordant conclusions. If the third reviewer did not agree with  
6  
7 158 either adjudicator, then the decision was determined by committee. Microbiologic results presented  
8  
9 159 include those adjudicated to be clinically relevant to participant's acute illness.  
10  
11

### 12 160 *Patient and Public Involvement*

13  
14  
15 161 Patients were not involved in recruitment, design, conduct, or dissemination plans of our research. Results  
16  
17 162 of this study were disseminated to hospital and clinical leadership at Takeo Provincial Hospital and  
18  
19 163 Komfo Anokye Teaching Hospital.  
20

21 164

### 22 23 165 *Statistical analysis*

24  
25 166 Summary statistics were calculated for the cohorts individually and pooled, comparing baseline  
26  
27 167 demographics (e.g., gender, age, ethnicity, selected medical comorbidities), baseline screening tool  
28  
29 168 scores, physiologic parameters, baseline clinical laboratory values using either Chi-square (categorical  
30  
31 169 values), Fishers exact (categorical values), or Kruskal-Wallis (continuous values) tests. Prevalence of  
32  
33 170 diagnoses were described for each cohort by organ system and pathogen type and by anatomic site.  
34  
35

36 171

37  
38 172 After checking the proportional hazards assumption, Cox regression was performed with bivariate models  
39  
40 173 to evaluate increased risk of death in each cohort by baseline demographics, comorbid conditions,  
41  
42 174 physiologic parameters, and clinical laboratory parameters. Physiologic parameters and clinical laboratory  
43  
44 175 parameters were modelled as dichotomous or ordinal parameters at clinically relevant abnormal range cut  
45  
46 176 offs (e.g., blood urea nitrogen  $\geq 20$ mg/dL) to explore associations with increased risk of death and for  
47  
48 177 clinical inference. Screening tools were dichotomized according to current usage, including qSOFA score  
49  
50 178  $\geq 2$  (range, 0 [best] to 3 [worst] points), SIRS score  $\geq 2$  (range, 0 [best] to 4 [worst] points), MEWS  $\geq 5$   
51  
52 179 (range, 0 [best] to 13 [worst] points), NEWS  $\geq 5$  (range, 0 [best] to 20 [worst] points), and UVA  $\geq 2$   
53  
54 180 (range, 0 [best] to 13 [worst])[13] and were evaluated in Cox regression models unadjusted and adjusted  
55  
56  
57  
58  
59  
60

1  
2  
3 181 for age and sex for risk of death [9]. Glasgow Coma Scale Score (GCS; range, 3 [worst] to 15 [best]  
4  
5 182 points) of less than 15 was used for estimation of the qSOFA score, and a GCS of  $\leq 3$  for  
6  
7 183 unresponsiveness for NEWS, and GCS score 3-15 for the “alert, verbal, pain, unresponsive” scale  
8  
9 184 (AVPU; alert: GCS 13-15, voice: GCS 9-12; pain: GCS 4-8; unresponsiveness: GCS  $\leq 3$ ) score  
10  
11 185 approximation for MEWS [18, 19]. Data was administratively right censored past 28 days. The Harrell’s  
12  
13 186 C-statistic was calculated for each screening tool for each cohort, the cohorts combined, and Cambodia  
14  
15 187 and Ghana cohorts pooled [20]. This statistic is a performance analogous to area under the receiver  
16  
17 188 operating characteristic curve (AUROC) but accounts for differences over time with survival outcomes.  
18  
19 189 C-statistic confidence interval estimates were determined.[21] The Cox regression Wald test p-values  
20  
21 190 were calculated for each score covariate adjusting for baseline risk estimated by age and sex to determine  
22  
23 191 if scores improved model accuracy above baseline risk [9, 22]. P-values  $< 0.002$  were considered  
24  
25 192 significant using a Bonferroni correction for multiple comparisons. Cohort sample sizes were determined  
26  
27 193 a priori through Monte Carlo simulation modelling for prognostic biomarker identification. All statistical  
28  
29 194 analyses were performed in SAS (Statistical Analytical Software, version 9.4), R version 4.0.2 [23] or  
30  
31 195 Stata (version 15.0; StataCorp LLC, College Station, TX, USA) [24].  
32  
33  
34  
35  
36

## 37 196 38 197 RESULTS

### 39 198 *Summary demographics, sepsis severity, and laboratory findings*

40  
41 199 There were 567 participants across the cohorts including 187 from Kumasi, Ghana, 200 from Takeo,  
42  
43 200 Cambodia, and 180 from Durham, North Carolina, United States (**Figure 1**). The study population was  
44  
45 201 predominantly male (57.1% male), with more male participants enrolled in Cambodia than at other sites  
46  
47 202 (68.0% vs 55.0% in the U.S. and 52.4% in Ghana). The overall median age was 50 years (interquartile  
48  
49 203 range [IQR], 36 to 63), which was similar across cohorts (**Table 1**). Previously diagnosed comorbid  
50  
51 204 conditions were most common at the U.S. site including a history of cardiovascular (65.6%; N=118),  
52  
53 205 respiratory (42.2%; N=76), or gastrointestinal (36.7%; N=66) conditions.  
54  
55  
56  
57  
58  
59  
60

**Table 1.** Baseline demographic characteristics stratified by sites.

| Characteristic                    | Total<br>(n=567) | Takeo,<br>Cambodia<br>(n=200) | Durham,<br>USA<br>(n=180) | Kumasi,<br>Ghana<br>(n=187) | p-value** |
|-----------------------------------|------------------|-------------------------------|---------------------------|-----------------------------|-----------|
| Female gender – no. (%)           | 243 (42.9%)      | 64 (32.0%)                    | 81 (45.0%)                | 98 (52.4%)                  | < 0.001   |
| Age – years, median (IQR)         | 50 (36 – 63)     | 50 (36 – 62)                  | 52.5 (40 – 63)            | 46 (35 – 63)                | 0.151     |
| Medical history* – no. (%)        |                  |                               |                           |                             |           |
| Cancer                            | 44 (9.9%)        | 0 (0.0%)                      | 44 (24.4%)                | 0 (0.0%)                    | < 0.001   |
| Cardiovascular                    | 202 (41.4%)      | 22 (18.2%)                    | 118 (65.6%)               | 62 (33.2%)                  | < 0.001   |
| Dermatologic                      | 15 (3.1%)        | 1 (0.8%)                      | 14 (7.8%)                 | 0 (0.0%)                    | < 0.001   |
| Endocrine                         | 126 (25.8%)      | 6 (5.0%)                      | 74 (41.1%)                | 46 (24.6%)                  | < 0.001   |
| Gastrointestinal                  | 76 (15.6%)       | 4 (3.3%)                      | 66 (36.7%)                | 6 (3.2%)                    | < 0.001   |
| Genitourinary or reproductive     | 34 (7.0%)        | 1 (0.8%)                      | 33 (18.3%)                | 0 (0.0%)                    | < 0.001   |
| HIV                               | 26 (4.7%)        | 12 (6.2%)                     | 8 (4.5%)                  | 6 (3.2%)                    | 0.388     |
| Neurological                      | 62 (12.7%)       | 1 (0.8%)                      | 44 (24.4%)                | 17 (9.1%)                   | < 0.001   |
| Other                             | 206 (42.2%)      | 48 (39.7%)                    | 151 (83.9%)               | 7 (3.7%)                    | < 0.001   |
| Psychiatric                       | 143 (29.3%)      | 41 (33.9%)                    | 78 (43.3%)                | 24 (12.8%)                  | < 0.001   |
| Renal                             | 41 (8.4%)        | 0 (0.0%)                      | 41 (22.8%)                | 0 (0.0%)                    | < 0.001   |
| Respiratory                       | 89 (18.2%)       | 7 (5.8%)                      | 76 (42.2%)                | 6 (3.2%)                    | < 0.001   |
| Rheumatologic                     | 29 (5.9%)        | 1 (0.8%)                      | 28 (15.6%)                | 0 (0.0%)                    | < 0.001   |
| Surgery                           | 27 (5.5%)        | 0 (0.0%)                      | 22 (12.2%)                | 5 (2.7%)                    | < 0.001   |
| Baseline scores – no. (%)         |                  |                               |                           |                             |           |
| MEWS ( $\geq 4$ )                 | 315 (57.8%)      | 81 (40.7%)                    | 105 (65.6%)               | 129 (69.3%)                 | < 0.001   |
| NEWS score ( $\geq 5$ )           | 324 (61.6%)      | 90 (47.9%)                    | 98 (64.5%)                | 136 (73.1%)                 | < 0.001   |
| qSOFA ( $\geq 2$ )                | 139 (25.4%)      | 22 (11.1%)                    | 48 (29.6%)                | 69 (37.1%)                  | < 0.001   |
| SIRS ( $\geq 2$ )                 | 447 (81.8%)      | 125 (68.3%)                   | 157 (89.2%)               | 165 (88.2%)                 | < 0.001   |
| UVA ( $\geq 2$ )                  | 199 (37.8%)      | 47 (25.8%)                    | 68 (42.8%)                | 84 (45.4%)                  | < 0.001   |
| Baseline scores<br>(median [IQR]) |                  |                               |                           |                             |           |
| MEWS                              | 4 (3-6)          | 3 (2-5)                       | 1 (0-4)                   | 1 (1-2)                     | < 0.001   |
| NEWS                              | 6 (3-8)          | 4 (2-7)                       | 7 (3-9)                   | 6 (4-8)                     | < 0.001   |
| qSOFA                             | 1 (1-2)          | 1 (0-1)                       | 1 (0-2)                   | 1 (1-2)                     | < 0.001   |
| SIRS                              | 2 (2-3)          | 2 (1-3)                       | 3 (2-3)                   | 3 (2-3)                     | < 0.001   |

**Table 1.** Baseline demographic characteristics stratified by sites.

| Characteristic | Total<br>(n=567) | Takeo,<br>Cambodia<br>(n=200) | Durham,<br>USA<br>(n=180) | Kumasi,<br>Ghana<br>(n=187) | p-value** |
|----------------|------------------|-------------------------------|---------------------------|-----------------------------|-----------|
| UVA            | 1 (0-3)          | 1 (0-2)                       | 1 (0-4)                   | 1 (0-4)                     | < 0.001   |

\*There were 79 subjects without comorbidity information in the Cambodia cohort. \*\*Categorical parameters compared with chi-squared test and numeric parameters compared with Kruskal-Wallis test. Not adjusted for multiple comparisons.

206 Clinical physiologic and laboratory value abnormalities at enrolment were common with median

207 respiratory rate at 24 (IQR: 20 to 30), the median white blood count elevated at  $12.05 \times 10^9$  cells/L (IQR:

208 8.13 to  $16.6 \times 10^9$  cells/L), and median lactate elevated at 2.27 mmol/L (IQR: 1.66 to 3.09 mmol/L)

209 (**Supplementary Table S1**). At enrolment, the proportion of an elevated qSOFA ( $\geq 2$ ) at baseline was

210 highest at the Ghana site with 44.4% (N=83) of participants compared to 26.0% (N=52) in Cambodia and

211 22.2% (N=40) in the United States. The SIRS, MEWS, NEWS, and UVA screening tools were similarly

212 higher in the Ghana cohort.

213

#### 214 *Pathogens detected*

215 The most common positive microbiologic results overall included bacteraemia (N=83), respiratory culture

216 growth (N=19), serum hepatitis B surface antigen (N=15), and malaria rapid diagnostic tests (N=11). A

217 minority (121 of 567, 21.3%) of subjects had confirmed infections with complete adjudicator agreement

218 using all available sources of clinical microbiologic results (with the notable addition of RNA sequencing

219 of samples from Cambodia[17]) including 90 (15.9%) bacterial, 17 viral (3.0%), 20 malarial (3.5%), and

220 2 (0.3%) fungal infections identified across all cohorts (**Supplementary Figure S1**). These infection

221 classes were different among sites (chi-squared test  $p < 0.001$ ).

222

223 In Cambodia, the most common bacterial infections with complete adjudicator agreement were *B.*

224 *pseudomallei* (N=10, with blood or respiratory culture growth), presumptive *M. tuberculosis* (N=5, with

225 acid fast positive smears), polymicrobial (N=5), and *O. tsutsugamushi* (N=4, determined by sequencing).

1  
2  
3 226 The most common causes of bacteraemia (17 total of 200 participants) were *B. pseudomallei* (N=8), *E.*  
4 227 *coli* (N=3), and polymicrobial infections (N=3). Three participants had a positive malaria RDT. Fungal  
5 228 infections were uncommon with 1 participant with non-albicans Candidemia and 1 with cryptococcal  
6 229 meningitis. Two individuals had dengue fever (one PCR positive and one adjudicated IgM positive).  
7  
8  
9

10  
11 230  
12  
13 231 In Ghana, the most common causes of bacteraemia (culture growth from 28 of 187 participants) were *E.*  
14 232 *coli* (N=6), *S. aureus* (N=6), *Salmonella spp.* (N=5), and *S. pneumoniae* (N=3). Nine participants had a  
15  
16 233 positive malaria RDT and 15 had a positive hepatitis B surface antigen.  
17  
18  
19

20 234  
21  
22 235 In the United States, the most common causes of bacteraemia (culture growth from 19 of 180  
23  
24 236 participants) were *E.coli* (N=5), *K. pneumoniae* (N=3), polymicrobial (N=2), *Pseudomonas spp.* (N=2),  
25  
26 237 or *S. aureus* (N=2). Viral infections detected by PCR included rhinovirus (N=5), influenza A (N=4),  
27  
28 238 respiratory syncytial virus (N=4), human immunodeficiency virus (N=3), and human metapneumovirus  
29  
30 239 (N=3). There was one participant with *Aspergillus fumigatus* fungal pneumonia.  
31  
32

33 240

### 34 241 *Diagnoses and Treatments*

35  
36 242 Across cohorts, the most common organ system sites of infection were lower respiratory tract infection  
37  
38 243 (28.7%; N=163), multifocal or generalized source of infection (including malaria) (13.6%; N=77), and  
39  
40 244 gastrointestinal (including hepatic) (12.7%; N=72) (**Figure S1a**). The most common antibiotics  
41  
42 245 administered in United States, Ghana, and Cambodia were beta-lactam antibiotics (**Supplementary**  
43  
44 246 **Figure S2**), but antibiotic regimens varied widely among sites. The most common antibiotics classes used  
45  
46 247 were other antibacterials (e.g., glycopeptide antibiotics, 58.9%), beta-lactam antibacterials, penicillins  
47  
48 248 (51.7%), and cephalosporin and carbapenem antibacterials (44.4%) in the United States, cephalosporins  
49  
50 249 and carbapenems (64.2%), macrolides, lincosamides and streptogramins (37.4%), and other antibacterials  
51  
52 250 (33.7%) in Ghana, and cephalosporins and carbapenems (73.0%), beta-lactam antibacterials, penicillins  
53  
54 251 (46.5%) and aminoglycoside antibacterials (39.0%) in Cambodia.  
55  
56  
57  
58  
59  
60

252

253 *Survival*

254 Among all cohorts, 16.4% (N=93) of participants had died at one month, including 58 (31.0%) in Ghana,  
255 22 (11.0%) in Cambodia, and 13 (7.2%) in the U.S (**Figure 1**). Among those that died within one month,  
256 median time to death was 4 days (IQR: 1 to 11) in Ghana, 7 days (IQR: 3 to 16) in Cambodia, 10 (IQR: 5  
257 to 19) in the U.S., and 5 days (IQR: 2 to 13) overall. Parameters to calculate the qSOFA score and 28-day  
258 mortality were available for 96.4% participants. Hypernatremia (>145 mEq/L) had the highest unadjusted  
259 risk of death (hazard ratio 6.89, 95% CI: 3.43, 13.85) among parameters tested in bivariate models  
260 (**Supplementary Figure S3**). All screening tools were associated with an increased risk of death (**Figure**  
261 **2**) with the largest increase among those with an elevated UVA score (**Supplementary Figure S3**). For  
262 individuals with a UVA  $\geq 2$  there was a 5.45 times increased risk of death (95% CI: 3.39 to 8.76; C-  
263 statistic: 0.70) and those with a qSOFA  $\geq 2$  had a 4.11 times increased risk of death (95% CI: 2.71 to 6.22;  
264 C-statistic: 0.66). Those with an elevated SIRS had a 1.81 times increased risk of death (95% CI: 0.94 to  
265 3.50; C-statistic:0.53). Elevated NEWS (HR: 4.03; 95% CI: 2.24 to 7.26; C-statistic: 0.66) and MEWS  
266 (HR: 2.03; 95% CI: 1.28 to 3.23; C-statistic: 0.53) had similarly increased risks (**Figure 3**).

267

268 Accuracy in an adjusted Cox model was highest for UVA (0.73; 95% CI 0.68-0.78) followed by qSOFA  
269 (C-statistic: 0.70; 95% CI: 0.64 to 0.75) (**Table 2**). The sensitivity for predicting death was highest with  
270 SIRS (89%; 95% CI: 80 to 94%) but specificity was lowest (19%; 95% CI: 16 to 26%). The UVA score  
271 had a sensitivity of 74% and specificity of 70%. The qSOFA score had the lowest sensitivity (54%; 95%  
272 CI: 44 to 65%) but highest specificity (80%; 95% CI: 76 to 84%). We observed that the qSOFA  
273 discrimination for mortality was moderate with a C-statistic of 0.70 adjusting for age and sex (**Figure 3**).  
274 There was similar qSOFA accuracy in individual cohorts from the United States (C-statistic 0.71; 95%  
275 CI: 0.54 to 0.89), Cambodia (C-statistic: 0.68; 95% CI: 0.59 to 0.77), or Ghana (C-statistic: 0.72; 95% CI:  
276 0.64 to 0.79) (**Figure 3**). Similarly, the UVA score had moderate accuracy with a C-statistics on 0.73  
277 (95% CI: 0.68 to 0.78). Other screening scores had similar moderate C-statistic values. The SIRS C-

278 statistic was 0.60 (95% CI: 0.54 to 0.65). Among participants with a NEWS score of  $\geq 5$  (62% of the  
 279 pooled cohort), the C-statistic was 0.68 (95% CI: 0.64 to 0.73) and among those with a MEWS score of  
 280  $\geq 4$  (58% of the pooled cohort), the C-statistic was 0.63 (95% CI: 0.58 to 0.68) for death. The qSOFA and  
 281 UVA scores were significantly greater than baseline risk in Ghana in contrast to other scores or cohorts  
 282 (Table 3). The qSOFA score increased prognostication accuracy in the United States cohort with a  $p=0.02$   
 283 but this was not significant after correcting for multiple comparisons. In Cambodia, while not significant

**Table 2.** Performance characteristics of sepsis score across cohorts for predicting 28-day mortality.

| Score               | Sensitivity<br>(95% CI) | Specificity<br>(95% CI) | PPV<br>(95% CI)      | NPV<br>(95% CI)      | Unadjusted<br>Bivariate<br>Cox model<br>C-statistic<br>(95% CI) | Adjusted*<br>Cox<br>model<br>C-statistic<br>(95% CI) | p-value<br>(Wald<br>test) |
|---------------------|-------------------------|-------------------------|----------------------|----------------------|-----------------------------------------------------------------|------------------------------------------------------|---------------------------|
| Age and sex         | –                       | –                       | –                    | –                    | –                                                               | 0.59<br>(0.53,0.64)                                  |                           |
| MEWS $\geq 4^*$     | 0.73 (0.63,<br>0.82)    | 0.45 (0.40,<br>0.49)    | 0.21 (0.16,<br>0.26) | 0.89 (0.85,<br>0.93) | 0.59 (0.54,<br>0.63)                                            | 0.63<br>(0.58,0.68)                                  | <b>0.002**</b>            |
| NEWS $\geq 5^*$     | 0.86<br>(0.77,0.93)     | 0.43<br>(0.38,0.48)     | 0.25<br>(0.23,0.28)  | 0.93 (0.89,<br>0.95) | 0.65 (0.64,<br>0.67)                                            | 0.68<br>(0.64,0.73)                                  | <b>&lt;0.001**</b>        |
| qSOFA<br>$\geq 2^*$ | 0.54 (0.44,<br>0.65)    | 0.80 (0.76,<br>0.84)    | 0.35 (0.27,<br>0.44) | 0.90 (0.87,<br>0.93) | 0.66 (0.61,<br>0.71)                                            | 0.70<br>(0.64,0.75)                                  | <b>&lt;0.001**</b>        |
| SIRS $\geq 2^*$     | 0.89 (0.80,<br>0.94)    | 0.19 (0.16,<br>0.23)    | 0.17 (0.14,<br>0.21) | 0.90 (0.82,<br>0.95) | 0.53 (0.50,<br>0.57)                                            | 0.60<br>(0.54,0.65)                                  | 0.134                     |
| UVA $\geq 2^*$      | 0.74<br>(0.64,<br>0.83) | 0.70 (0.65,<br>0.74)    | 0.33 (0.27,<br>0.40) | 0.93<br>(0.90,0.95)  | 0.70 (0.65,<br>0.74)                                            | 0.73<br>(0.68,0.78)                                  | <b>&lt;0.001**</b>        |

\*Adjusted Cox model C-statistic is adjusted for age and gender. Note: p-value are from Wald test of the adjusted Cox regression model.

\*\*Significant at  $p<0.002$

284 after correction, NEWS ( $p=0.01$ ) and UVA ( $p=0.01$ ) scores increased accuracy greater than baseline risk.  
 285 When pooling LMIC cohorts (i.e., Ghana and Cambodia), after adjustment for age and sex, the qSOFA  
 286 (C-statistic: 0.71; 95% CI: 0.66 to 0.77) and UVA scores (C-statistic: 0.76; 95% CI: 0.71 to 0.81) had

**Table 3.** Performance characteristics of sepsis score across cohorts for predicting 28-day mortality stratified by site.

| Model       | Takeo, Cambodia      |         | Durham, USA          |         | Kumasi, Ghana        |         |
|-------------|----------------------|---------|----------------------|---------|----------------------|---------|
|             | C-statistic (95% CI) | p-value | C-statistic (95% CI) | p-value | C-statistic (95% CI) | p-value |
| Age and Sex | 0.68 (0.59, 0.78)    | –       | 0.68 (0.54,0.81)     | –       | 0.57 (0.49, 0.64)    | –       |



|              |                   |        |                   |        |                   |                   |
|--------------|-------------------|--------|-------------------|--------|-------------------|-------------------|
| <b>MEWS</b>  | 0.68 (0.59, 0.78) | 0.2102 | 0.68 (0.57, 0.79) | 0.4991 | 0.63 (0.56, 0.70) | 0.0097            |
| <b>NEWS</b>  | 0.73 (0.63, 0.83) | 0.0106 | 0.71 (0.59, 0.84) | 0.2557 | 0.64 (0.57, 0.70) | 0.0022            |
| <b>qSOFA</b> | 0.68 (0.59, 0.77) | 0.5101 | 0.71 (0.54, 0.89) | 0.0365 | 0.72 (0.64, 0.79) | <b>&lt;0.001*</b> |
| <b>SIRS</b>  | 0.69 (0.60, 0.78) | 0.5020 | 0.69 (0.55, 0.83) | 0.5831 | 0.58 (0.51, 0.65) | 0.1882            |
| <b>UVA</b>   | 0.71 (0.60, 0.83) | 0.0109 | 0.70 (0.55, 0.85) | 0.4753 | 0.77 (0.71,0.83)  | <b>&lt;0.001*</b> |

*Note: p-value are from Wald test of the adjusted Cox regression model. Each model is adjusted for age and sex. \*Significant at p<0.002*

287 higher accuracy compared with MEWS (C-statistic: 0.66 (95% CI 0.61 to 0.72), NEWS (C-statistic: 0.70  
 288 (95% CI: 0.65 to 0.76), and SIRS (C-statistic: 0.61; 95% CI: 0.55 to 0.67) (**Supplementary Table S2**). In  
 289 contrast, in the United States cohort, NEWS, MEWS, SIRS, qSOFA, and UVA scores after age and sex  
 290 adjustment each had similar accuracy with C-statistics ranging from 0.66 to 0.71 (**Table 3 and**  
 291 **Supplementary Table S3**).

## 293 DISCUSSION

294 In pooled prospective international cohorts in Cambodia, Ghana, and the United States, the UVA score  
 295 and Sepsis-3 (qSOFA) performed well with a C-statistic around 0.7 for predicting 28-day mortality.  
 296 However, this improvement was largely identified in the cohort in Ghana and the accuracy was no  
 297 different than baseline risk in the Cambodia cohort. There was a trend towards improving prognostication  
 298 accuracy with the NEWS and UVA score in Cambodia and only with the qSOFA score in the United  
 299 States. These results suggest that widely used sepsis screening tools may have varying performance for  
 300 prognostication in diverse settings with different treatment regimens and aetiologies of sepsis. Therefore,  
 301 screening tools should be selected after validation within populations prior to widespread adoption.

302  
 303 High sodium (hyponatremia) was associated with the highest risk of 28-day death among individual  
 304 clinical parameters. Hyponatremia during critical illness has been previously associated with mortality in  
 305 large observational studies from high resource settings [25, 26]. Hyponatremia can occur in sepsis due to  
 306 intravascular fluid loss due to breakdown of vascular cell junctions, insensible fluid losses, or dehydration

1  
2  
3 307 from the disease process [27]. There can also be an iatrogenic contribution from diuretics, sodium from  
4  
5 308 intravenous fluids, or with inadequate fluid resuscitation. Ultimately, there is not data available to  
6  
7 309 precisely determine the causes of hypernatremia among the participants in our cohorts. However, our  
8  
9 310 results highlight the universal risk of death among those with hypernatremia among those with sepsis and  
10  
11 311 emphasize the need for close management of fluid and electrolytes across critical care settings.  
12

13  
14 312  
15  
16 313 Current sepsis screening tools have had variable performance when applied for prognostication. SOFA or  
17  
18 314 APACHE scores have been developed specifically for prognostication but required parameters including  
19  
20 315 arterial blood oxygen saturation are often not available [9]. Performance of qSOFA and SIRS for  
21  
22 316 mortality have performed poorly (SIRS, area under the receiving operator curve [AUROC], 0.61; qSOFA:  
23  
24 317 AUROC, 0.61) for prognostication in high-resource settings intensive care unit (ICU ) settings [14] and in  
25  
26 318 diverse LMICs (adjusted SIRS: AUROC, 0.59; adjusted qSOFA: AUROC, 0.70) [9] in prior studies for  
27  
28 319 mortality prognostication. While qSOFA is generally more specific than other screening tools, it is less  
29  
30 320 sensitive than SIRS, MEWS, and NEWS, which is consistent with our data[28]. When applied to sepsis  
31  
32 321 identification, Surviving Sepsis 2021 guidelines recommend against solely using qSOFA, [29] due to  
33  
34 322 being a more specific rather than sensitive screening test. Additionally, qSOFA has been found to be  
35  
36 323 inferior to MEWS, and NEWS but more accurate and specific than SIRS for predicting in-hospital  
37  
38 324 mortality and ICU transfer in a large retrospective cohort of over 30 thousand patients in the United States  
39  
40 325 (NEWS: AUROC, 0.77; MEWS: AUROC, 0.73; qSOFA: AUROC, 0.69; SIRS: AUROC, 0.65) [28].  
41  
42 326 Different screening scores have been evaluated in prospective cohorts in sub-Saharan Africa (SSA)  
43  
44 327 previously in Tanzania (qSOFA: AUROC, 0.57; MEWS: AUROC, 0.49) [30] and Rwanda [31] (MEWS:  
45  
46 328 AUROC, 0.69; UVA: AUROC, 0.71; qSOFA: AUROC, 0.65) and in Gabon [32] (UVA: AUROC, 0.90;  
47  
48 329 qSOFA: AUROC, 0.77; MEWS: AUROC, 0.72; SIRS: AUROC, 0.70). Given the performance variability  
49  
50 330 that has been previously observed and was observed in this study, it is prudent to evaluate prediction  
51  
52 331 scores within the populations they serve prior to widespread promotion.  
53  
54 332  
55  
56  
57  
58  
59  
60

1  
2  
3 333 The UVA score performed better than baseline risk in the Ghana cohort. Our results externally validated  
4  
5 334 the UVA score for use prognostication of hospitalized patients with suspected sepsis in Kumasi, Ghana  
6  
7 335 and potentially in the region when demographics are similar. The superiority of the UVA score in the  
8  
9 336 Ghana cohort could be related to similarities in infectious causes of illness with other countries in SSA  
10  
11 337 populations from which the UVA score was derived[12]. In contrast to the score derivation study[12],  
12  
13 338 UVA score performed similarly to qSOFA in Ghana. The accuracy of the UVA scores was not greater  
14  
15 339 than baseline risk in the cohort in Cambodia after adjustment for multiple comparisons. While  
16  
17 340 conclusions may be limited by sample size, sepsis scores derived from the regions of the world with more  
18  
19 341 similar infectious aetiologies may perform better. Our results highlight the importance of validating  
20  
21 342 scores in new patient populations prior to widespread use.  
22  
23

24 343  
25  
26 344 This study had multiple limitations. First, exclusion criteria of immunocompromising conditions except  
27  
28 345 HIV may have led to a skewed populations from Ghana and Cambodia. These exclusion criteria were  
29  
30 346 created to decrease the effect of comorbid conditions or medications on immune biomarkers. However, in  
31  
32 347 Cambodia and Ghana, immunosuppressive medications or diagnoses of chronic liver or kidney disease  
33  
34 348 may be less common in the general population due to limited access to specialists or specialized  
35  
36 349 medications. Additionally, while there were differences in the baseline severity between cohorts, study  
37  
38 350 processes including inclusion criteria were largely standardized across sites improving the comparability  
39  
40 351 of the cohorts in diverse settings and baseline risk was adjusted in models using age and sex. Diagnostic  
41  
42 352 testing differed at each site and mortality specifically due to sepsis could not be determined. Enrolment  
43  
44 353 was by convenience sampling within the referral hospital catchment area and may not be representative of  
45  
46 354 the general population within these countries. Approximation of the mental status for the MEWS scoring  
47  
48 355 using GCS may not be generalizable to the use of GCS at other sites. However, similar MEWS and  
49  
50 356 NEWS performance was observed across sites. Lastly, due to the limited sample size in each of the  
51  
52 357 cohorts, smaller improvements in accuracy may not have been identified in the Cambodia and United  
53  
54 358 States cohorts that had less deaths compared to the Ghana cohort.  
55  
56  
57  
58  
59  
60

1  
2  
3 359  
4  
5 360 Inexpensive and readily available tools are needed for triage in resource-limited areas in the world to help  
6  
7 361 identify patients that need escalation and possible transfer to higher levels of care. Current widely used  
8  
9 362 sepsis screening tools represent a clinical benchmark for the development of future triage tools. Research  
10  
11 363 is ongoing to assess point-of-care diagnostics within our sepsis cohort research network. Assays with  
12  
13 364 portable and low-cost inflammation biomarkers tests, molecular diagnostics, or point-of-care ultrasound  
14  
15 365 (POCUS) have the potential to augment the performance of clinical screening tools towards a more  
16  
17 366 personalized approach to sepsis recognition and triage.  
18  
19  
20 367

## 21 22 368 CONCLUSION

23  
24 369 Sepsis screening tools that are widely used during clinical care had sub-optimal performance for risk  
25  
26 370 stratification in three international cohorts with increased performance of the UVA and qSOFA scores in  
27  
28 371 Ghana compared to baseline risk. There remains a need for reliable, low-cost, and scalable  
29  
30 372 prognostication methods that are validated in diverse settings.  
31  
32  
33 373

34  
35 374 **Funding:** Defense Threat Reduction Agency (JSTO-CBA) to Naval Medical Research Center (NMRC)  
36  
37 375 (HDTRA1516108), Defense Health Bureau of Medicine & Surgery to NMRC for Combating Antibiotic  
38  
39 376 Resistance Bacteria (FY1819 0130.1832), Naval Medical Logistics Command Cooperative Agreement  
40  
41 377 (N626451920001).  
42  
43  
44 378

45  
46  
47 379 **Conflicts of Interest:** ELT has held equity and consulted for Predigen and Biomeme, and he is an employee  
48  
49 380 of Danaher Diagnostics. All other authors declared no competing interests.  
50

51 381  
52  
53  
54  
55  
56  
57  
58  
59  
60

1  
2  
3 382 **Ethics approval:** Study protocols were approved by the Naval Medical Research Center (NMRC)  
4  
5 383 Institutional Review Board (IRB) (Cambodia sepsis study # NMRC.2013.0019; Ghana sepsis study #  
6  
7 384 NMRC.2016.0004-GHA; Duke sepsis study Duke#PRO00054849) in compliance with all applicable  
8  
9 385 Federal regulations governing the protection of human subjects as well as host country IRBs. The study  
10  
11 386 protocol in Cambodia was approved by the Cambodian National Ethics Committee for Health Research  
12  
13 387 (NECHR). The protocol in Ghana was approved by the Committee on Human Research, Publication and  
14  
15 388 Ethics (CHRPE) at Kwame Nkrumah University of Science & Technology. All procedures were in  
16  
17 389 accordance with the ethical standards of the Helsinki Declaration of the World Medical Association. All  
18  
19 390 patients, or their legally authorized representatives, provided written informed consent.  
20  
21  
22  
23

24  
25 392 **Disclaimer:** K.L.S. is an employee of the US government, and C.B, N.A., C.D., M.P., and A.L. are military  
26  
27 393 service members. This work was prepared as a part of official duties. Title 17 U.S.C. 105 provides that  
28  
29 394 ‘Copyright protection under this title is not available for any work of the United States Government.’ Title  
30  
31 395 17 U.S.C. 101 defines a U.S. Government work as a work prepared by a military service member or  
32  
33 396 employee of the U.S. Government as part of a person’s official duties. The views expressed reflect the  
34  
35 397 results of research conducted by the authors and do not necessarily reflect the official policy or position of  
36  
37 398 the Department of the Navy, Department of Defense, nor the United States Government.  
38  
39  
40  
41

42  
43 400 **Contributorship Statement:** PWB, RM, JB, LM, DAS, REM performed data curation and analyses. PWB,  
44  
45 401 KLS, and DVC developed the manuscript concept. DVC and KLS provided resources for research  
46  
47 402 development. AL, KLS, CO, JC, TS, ERK, ELT, CB, CWW, AF, AL, DF, JVL, MP, MR, NA, CD, MGG,  
48  
49 403 TV, AO, DA, and GO were involved in protocol development and data generation. LM, MS, WH, SK, were  
50  
51 404 involved in research operations. AL, KLS, CWW, DF, ELT, CB, DVC, and PWB were involved in  
52  
53 405 manuscript revisions. All authors reviewed and approved of this manuscript.  
54  
55  
56  
57

58  
59  
60 406

1  
2  
3 407 **Data sharing statement:** De-identified data may be made available upon reasonable request to the  
4  
5 408 corresponding author.  
6

7  
8 409

9  
10 410 **References**

- 11  
12 411 1. Reinhart, K., et al., *Recognizing Sepsis as a Global Health Priority - A WHO Resolution*. N Engl  
13  
14 412 J Med, 2017. **377**(5): p. 414-417.  
15  
16 413 2. Rudd, K.E., et al., *Global, regional, and national sepsis incidence and mortality, 1990-2017:*  
17  
18 414 *analysis for the Global Burden of Disease Study*. Lancet, 2020. **395**(10219): p. 200-211.  
19  
20 415 3. Maitland, K., et al., *Mortality after fluid bolus in African children with severe infection*. N Engl J  
21  
22 416 Med, 2011. **364**(26): p. 2483-95.  
23  
24 417 4. Andrews, B., et al., *Effect of an Early Resuscitation Protocol on In-hospital Mortality Among*  
25  
26 418 *Adults With Sepsis and Hypotension: A Randomized Clinical Trial*. Jama, 2017. **318**(13): p. 1233-  
27  
28 419 1240.  
29  
30 420 5. WHO, in *Dengue: Guidelines for Diagnosis, Treatment, Prevention and Control: New Edition*.  
31  
32 421 2009: Geneva.  
33  
34 422 6. Singer, M., et al., *The Third International Consensus Definitions for Sepsis and Septic Shock*  
35  
36 423 *(Sepsis-3)*. JAMA, 2016. **315**(8): p. 801-810.  
37  
38 424 7. Zimmerman, J.E., et al., *Acute Physiology and Chronic Health Evaluation (APACHE) IV:*  
39  
40 425 *hospital mortality assessment for today's critically ill patients*. Crit Care Med, 2006. **34**(5): p.  
41  
42 426 1297-310.  
43  
44 427 8. Singer, M., et al., *The Third International Consensus Definitions for Sepsis and Septic Shock*  
45  
46 428 *(Sepsis-3)*. Jama, 2016. **315**(8): p. 801-10.  
47  
48 429 9. Rudd, K.E., et al., *Association of the Quick Sequential (Sepsis-Related) Organ Failure*  
49  
50 430 *Assessment (qSOFA) Score With Excess Hospital Mortality in Adults With Suspected Infection in*  
51  
52 431 *Low- and Middle-Income Countries*. Jama, 2018. **319**(21): p. 2202-2211.  
53  
54  
55  
56  
57  
58  
59

- 1  
2  
3 432 10. Subbe, C.P., et al., *Validation of a modified Early Warning Score in medical admissions*. *Qjm*,  
4  
5 433 2001. **94**(10): p. 521-6.  
6  
7 434 11. Smith, G.B., et al., *The ability of the National Early Warning Score (NEWS) to discriminate*  
8  
9 435 *patients at risk of early cardiac arrest, unanticipated intensive care unit admission, and death*.  
10  
11 436 *Resuscitation*, 2013. **84**(4): p. 465-70.  
12  
13 437 12. Moore, C.C., et al., *Derivation and validation of a universal vital assessment (UVA) score: a tool*  
14  
15 438 *for predicting mortality in adult hospitalised patients in sub-Saharan Africa*. *BMJ Glob Health*,  
16  
17 439 2017. **2**(2): p. e000344.  
18  
19 440 13. Adegbite, B.R., et al., *A comparison of different scores for diagnosis and mortality prediction of*  
20  
21 441 *adults with sepsis in Low-and-Middle-Income Countries: a systematic review and meta-analysis*.  
22  
23 442 *EClinicalMedicine*, 2021. **42**: p. 101184.  
24  
25 443 14. Raith, E.P., et al., *Prognostic Accuracy of the SOFA Score, SIRS Criteria, and qSOFA Score for*  
26  
27 444 *In-Hospital Mortality Among Adults With Suspected Infection Admitted to the Intensive Care*  
28  
29 445 *Unit*. *Jama*, 2017. **317**(3): p. 290-300.  
30  
31 446 15. Krishnan, S., et al., *Austere environments Consortium for Enhanced Sepsis Outcomes (ACESO)*.  
32  
33 447 *Shock*, 2020. **53**(3): p. 377-378.  
34  
35 448 16. Schully, K.L., et al., *Melioidosis in lower provincial Cambodia: A case series from a prospective*  
36  
37 449 *study of sepsis in Takeo Province*. *PLoS Negl Trop Dis*, 2017. **11**(9): p. e0005923.  
38  
39 450 17. Rozo, M., et al., *An Observational Study of Sepsis in Takeo Province Cambodia: An in-depth*  
40  
41 451 *examination of pathogens causing severe infections*. *PLoS Negl Trop Dis*, 2020. **14**(8): p.  
42  
43 452 e0008381.  
44  
45 453 18. Kelly, C.A., A. Upex, and D.N. Bateman, *Comparison of consciousness level assessment in the*  
46  
47 454 *poisoned patient using the alert/verbal/painful/unresponsive scale and the Glasgow Coma Scale*.  
48  
49 455 *Ann Emerg Med*, 2004. **44**(2): p. 108-13.  
50  
51 456 19. Nedeia, D. *AVPU Scale*. 18 January, 2022]; Available from: [https://www.mdapp.co/avpu-scale-](https://www.mdapp.co/avpu-scale-calculator-163/)  
52  
53 457 [calculator-163/](https://www.mdapp.co/avpu-scale-calculator-163/).  
54  
55  
56  
57  
58  
59  
60

- 1  
2  
3 458 20. Harrell, F.E., Jr, et al., *Evaluating the Yield of Medical Tests*. JAMA, 1982. **247**(18): p. 2543-  
4 459 2546.  
5  
6  
7 460 21. Han, X., Y. Zhang, and Y. Shao, *On comparing 2 correlated C indices with censored survival*  
8 461 *data*. Stat Med, 2017. **36**(25): p. 4041-4049.  
9  
10  
11 462 22. Pepe, M.S., et al., *Testing for improvement in prediction model performance*. Stat Med, 2013.  
12 463 **32**(9): p. 1467-82.  
13  
14  
15 464 23. Team, T.R.D.C., *R: A language environment for statistical computing. R Foundation for*  
16 465 *Statistical Computing*. 2020.  
17  
18  
19 466 24. StataCorp, L., *Stata statistical software: release 16 College Station*. TX StataCorp LP, 2019.  
20  
21  
22 467 25. Castello, L.M., et al., *Hypernatremia and moderate-to-severe hyponatremia are independent*  
23 468 *predictors of mortality in septic patients at emergency department presentation: A sub-group*  
24 469 *analysis of the need-speed trial*. Eur J Intern Med, 2021. **83**: p. 21-27.  
25  
26  
27  
28 470 26. Olsen, M.H., et al., *Association Between ICU-Acquired Hypernatremia and In-Hospital*  
29 471 *Mortality: Data From the Medical Information Mart for Intensive Care III and the Electronic*  
30 472 *ICU Collaborative Research Database*. Crit Care Explor, 2020. **2**(12): p. e0304.  
31  
32  
33  
34 473 27. Lindner, G. and G.C. Funk, *Hypernatremia in critically ill patients*. J Crit Care, 2013. **28**(2): p.  
35 474 216.e11-20.  
36  
37  
38  
39 475 28. Churpek, M.M., et al., *Quick Sepsis-related Organ Failure Assessment, Systemic Inflammatory*  
40 476 *Response Syndrome, and Early Warning Scores for Detecting Clinical Deterioration in Infected*  
41 477 *Patients outside the Intensive Care Unit*. Am J Respir Crit Care Med, 2017. **195**(7): p. 906-911.  
42  
43  
44  
45 478 29. Evans, L., et al., *Surviving sepsis campaign: international guidelines for management of sepsis*  
46 479 *and septic shock 2021*. Intensive care medicine, 2021. **47**(11): p. 1181-1247.  
47  
48  
49  
50 480 30. Carugati, M., et al., *Predicting Mortality for Adolescent and Adult Patients with Fever in*  
51 481 *Resource-Limited Settings*. Am J Trop Med Hyg, 2018. **99**(5): p. 1246-1254.  
52  
53  
54  
55  
56  
57  
58  
59  
60



- 1  
2  
3 482 31. Klinger, A., et al., *Predicting mortality in adults with suspected infection in a Rwandan hospital:*  
4  
5 483 *an evaluation of the adapted MEWS, qSOFA and UVA scores.* BMJ Open, 2021. **11**(2): p.  
6  
7 484 e040361.  
8  
9 485 32. Schmedding, M., et al., *A Prospective Comparison of Quick Sequential Organ Failure*  
10  
11 486 *Assessment, Systemic Inflammatory Response Syndrome Criteria, Universal Vital Assessment,*  
12  
13 487 *and Modified Early Warning Score to Predict Mortality in Patients with Suspected Infection in*  
14  
15 488 *Gabon.* Am J Trop Med Hyg, 2019. **100**(1): p. 202-208.  
16  
17  
18 489

1  
2  
3  
4  
5  
6  
7  
8  
9  
10  
11  
12  
13  
14  
15  
16  
17  
18  
19  
20  
21  
22  
23  
24  
25  
26  
27  
28  
29  
30  
31  
32  
33  
34  
35  
36  
37  
38  
39  
40  
41  
42  
43  
44  
45  
46  
47  
48  
49  
50  
51  
52  
53  
54  
55  
56  
57  
58  
59  
60

**490 Figure Legends**

- 491 Figure 1. Enrolment flow diagram across cohorts.
- 492 Figure 2. Kaplan-Meier survival plot of 28-day mortality stratified by site.
- 493 Figure 3. The C-statistic by score overall and by cohort (adjusted for age and sex).
- 494
- 495

For peer review only

**Kumasi, Ghana**



**Durham, United States**



**Takeo, Cambodia**



1  
2  
3  
4  
5  
6  
7  
8  
9  
10  
11  
12  
13  
14  
15  
16  
17  
18  
19  
20  
21  
22  
23  
24  
25  
26  
27  
28  
29  
30  
31  
32  
33  
34  
35  
36  
37  
38  
39  
40  
41

1  
2  
3  
4  
5  
6  
7  
8  
9  
10  
11  
12  
13  
14  
15  
16  
17  
18  
19  
20  
21  
22  
23  
24  
25  
26  
27  
28  
29  
30  
31  
32  
33  
34  
35  
36  
37  
38  
39  
40  
41  
42  
43  
44  
45  
46  
47  
48  
49  
50  
51  
52  
53  
54  
55  
56  
57  
58  
59  
60

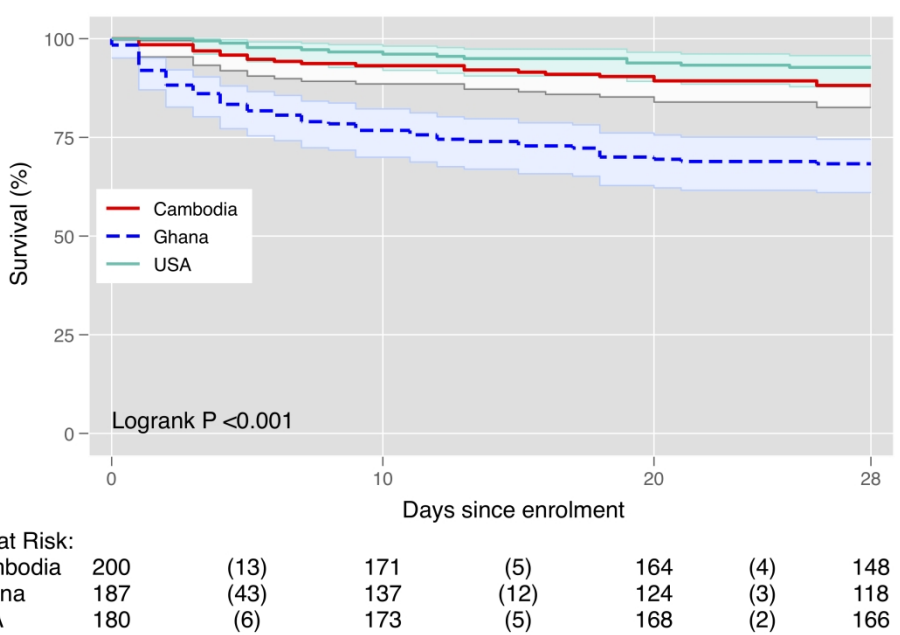

Figure 2. Kaplan-Meier survival plot of 28-day mortality stratified by site.

387x258mm (236 x 236 DPI)



Figure 3. The C-statistic by score overall and by cohort (adjusted for age and sex).

165x96mm (800 x 800 DPI)

**Table S1.** Baseline physiologic and clinical laboratory parameters by site at enrollment.

| <b>Parameter</b>                             | <b>Total<br/>Median (IQR)</b> | <b>Takeo, Cambodia<br/>Median (IQR)</b> | <b>Durham, USA<br/>Median (IQR)</b> | <b>Kumasi, Ghana<br/>Median (IQR)</b> |
|----------------------------------------------|-------------------------------|-----------------------------------------|-------------------------------------|---------------------------------------|
| <b>Physiologic parameters</b>                |                               |                                         |                                     |                                       |
| Respiratory rate (breaths per minute)        | 24 (20, 30)                   | 24 (20, 28)                             | 24 (20, 31)                         | 26 (22, 30)                           |
| Systolic blood pressure (mmHg)               | 120 (100, 130)                | 110 (100, 130)                          | 113 (96, 129)                       | 127.5 (110, 140)                      |
| Diastolic blood pressure (mmHg)              | 70 (60, 80)                   | 70 (70, 80)                             | 64 (56, 75)                         | 80 (60, 90)                           |
| Oxygen saturation (%)                        | 97 (94, 98)                   | 98 (96, 98)                             | 95 (92, 97.5)                       | 97 (95, 98)                           |
| Temperature (°C)                             | 37.9 (37, 38.7)               | 37.5 (37, 38.5)                         | 38.1 (36.9, 38.89)                  | 38.2 (37.4, 38.8)                     |
| Heart rate (beats per minute)                | 105 (94, 118)                 | 96 (86.5, 105.5)                        | 111 (99.5, 124)                     | 111 (99, 118)                         |
| <b>Clinical laboratory parameters</b>        |                               |                                         |                                     |                                       |
| White blood cells (x10 <sup>9</sup> cells/L) | 12.05 (8.13, 16.6)            | 11.9 (8.2, 16.6)                        | 13.35 (9.7, 17.6)                   | 10.76 (7.68, 15.41)                   |
| Platelets (x10 <sup>9</sup> cells/L)         | 222 (152.5, 321.5)            | 262 (169, 366)                          | 236.5 (160, 291)                    | 193 (137, 284)                        |
| Sodium (mEq/L)                               | 135 (132, 138)                | 135 (131, 138)                          | 137 (134, 139)                      | 134 (130, 138)                        |
| Potassium (mEq/L)                            | 3.7 (3.3, 4.2)                | 3.7 (3.2, 4.1)                          | 3.9 (3.5, 4.3)                      | 3.6 (3.2, 4)                          |
| Sodium Bicarbonate (mmol/L)                  | 24 (21, 26)                   | 24 (22, 27)                             | 25 (22, 27)                         | 22 (19, 25)                           |
| Glucose (mg/dL)                              | 6.56 (5.4, 10)                | 6.44 (5.39, 8.28)                       | 6.69 (5.67, 10.06)                  | 6.65 (5.2, 12)                        |
| Blood Urea Nitrogen (mg/dL)                  | 5 (3.57, 7.9)                 | 4.29 (3.21, 5.71)                       | 5.71 (3.57, 10)                     | 5.4 (3.5, 9.4)                        |
| Creatinine (mg/dL)                           | 88.42 (66, 130)               | 79.58 (53.05, 88.42)                    | 106.1 (70.74, 150.31)               | 91 (70, 135)                          |
| Alkaline Phosphatase (U/L)                   | 86.5 (65, 132)                | 98.5 (72, 172)                          | 80 (63, 106)                        | 85 (63, 125)                          |
| Alanine Transaminase (U/L)                   | 32 (22, 58)                   | 46 (27, 86)                             | 22 (18, 40)                         | 29 (22, 48)                           |
| Aspartate Aminotransferase (U/L)             | 42 (27, 76)                   | 61 (38, 117)                            | 29 (21, 45)                         | 35.5 (25, 65)                         |
| Bilirubin (mg/dL)                            | 15 (10.26, 21)                | 13.68 (10.26, 20.52)                    | 15.39 (10.26, 20.52)                | 15 (11, 23)                           |

---

| <b>Parameter</b>     | <b>Total<br/>Median (IQR)</b> | <b>Takeo, Cambodia<br/>Median (IQR)</b> | <b>Durham, USA<br/>Median (IQR)</b> | <b>Kumasi, Ghana<br/>Median (IQR)</b> |
|----------------------|-------------------------------|-----------------------------------------|-------------------------------------|---------------------------------------|
| Albumin (g/dL)       | 3.0 (2.5, 3.5)                | 2.9 (2.5, 3.4)                          | 3.0 (2.5, 3.5)                      | 3.0 (2.3, 3.6)                        |
| Total protein (g/dL) | 73 (65, 79)                   | 74 (68, 79.5)                           | 67 (57, 72)                         | 75 (69, 83)                           |
| Lactate (mmol/L)     | 2.27 (1.66, 3.09)             | 2.33 (1.79, 3.03)                       | 1.5 (1, 2.4)                        | 2.54 (1.8, 3.42)                      |

---

*\*All variables are presented as median, interquartile range*

For peer review only

**Table S2.** Performance characteristics of sepsis score across Cambodia and Ghana sites combined for predicting 28-day mortality.

| Score                            | Sensitivity (95% CI) | Specificity (95% CI) | PPV (95% CI)       | NPV (95% CI)       | Unadjusted Bivariate Cox model C-statistic (95% CI) | Adjusted* Cox model C-statistic (95% CI) | p-value          |
|----------------------------------|----------------------|----------------------|--------------------|--------------------|-----------------------------------------------------|------------------------------------------|------------------|
| <b>Baseline</b>                  |                      |                      |                    |                    |                                                     | 0.60 (0.54 – 0.66)                       |                  |
| <b>MEWS <math>\geq 4</math></b>  | 0.74 (0.64 – 0.84)   | 0.50 (0.44 – 0.56)   | 0.28 (0.25 – 0.32) | 0.88 (0.84 – 0.92) | 0.62 (0.57 – 0.66)                                  | 0.66 (0.61 – 0.72)                       | <b>&lt;0.001</b> |
| <b>NEWS <math>\geq 5</math></b>  | 0.85 (0.75– 0.92)    | 0.46 (0.38– 0.52)    | 0.33 (0.29– 0.36)  | 0.91 (0.85 – 0.94) | 0.65 (0.62 – 0.70)                                  | 0.70 (0.65 – 0.76)                       | <b>0.001</b>     |
| <b>qSOFA <math>\geq 2</math></b> | 0.54 (0.42 – 0.65)   | 0.84 (0.80 – 0.88)   | 0.47 (0.39 – 0.55) | 0.87 (0.84 – 0.90) | 0.67 (0.62 – 0.73)                                  | 0.71 (0.66– 0.77)                        | <b>&lt;0.001</b> |
| <b>SIRS <math>\geq 2</math></b>  | 0.88 (0.78 = 0.94)   | 0.24 (0.19 (0.30)    | 0.23 (0.21 – 24)   | 0.89 (0.81 – 0.94) | 0.55 (0.51 – 0.59)                                  | 0.61 (0.55 – 0.67)                       | 0.066            |
| <b>UVA <math>\geq 2</math></b>   | 0.75 (0.65 – 0.84)   | 0.74 (0.70 – 0.80)   | 0.45 (0.40 - 0.52) | 0.92 (0.88 - 0.94) | 0.73 (0.68 – 0.77)                                  | 0.76 (0.71– 0.81)                        | <b>&lt;0.001</b> |



**Table S3.** Performance characteristics of sepsis score across the United States site for predicting 28-day mortality.

| Score                               | Sensitivity<br>(95% CI) | Specificity<br>(95% CI) | PPV<br>(95% CI)       | NPV<br>(95% CI)      | Unadjusted<br>Bivariate<br>Cox model<br>C-statistic<br>(95% CI) | Adjusted*<br>Cox model<br>C-statistic<br>(95% CI) | p-value |
|-------------------------------------|-------------------------|-------------------------|-----------------------|----------------------|-----------------------------------------------------------------|---------------------------------------------------|---------|
| <b>Baseline<br/>(age +sex)</b>      |                         |                         |                       |                      |                                                                 | 0.61 (0.52 –<br>0.66)                             |         |
| <b>MEWS<math>\geq</math>4</b>       | 0.60 (0.26-<br>0.87)    | 0.33 (0.26<br>–0.41)    | 0.05 (0.03<br>–0.09)  | 0.92 (0.85<br>–0.96) | 0.53 (0.38 –<br>0.67)                                           | 0.68 (0.57 –<br>0.79)                             | 0.743   |
| <b>NEWS<math>\geq</math>5</b>       | 0.90 (0.56 –<br>0.99)   | 0.37 (0.29<br>–0.45)    | 0.09 (0.07<br>–0.11)  | 0.98 (0.89-<br>0.99) | 0.63 (0.54 -<br>0.71)                                           | 0.71 (0.59-<br>0.84)                              | 0.256   |
| <b>qSOFA<br/><math>\geq</math>2</b> | 0.60 (0.26 -<br>87)     | 0.72 (0.65<br>–0.79)    | 0.13 (0.08<br>- 0.20) | 0.96 (0.93<br>–0.98) | 0.66 (0.51 –<br>0.81)                                           | 0.71 (0.54 –<br>0.89)                             | 0.019   |
| <b>SIRS <math>\geq</math>2</b>      | 0.92 (0.64 -<br>0.99)   | 0.11 (0.07<br>–0.16)    | 0.08 (0.07<br>–0.09)  | 0.94 (0.72<br>–0.99) | 0.51 (0.45 –<br>0.58)                                           | 0.66 (0.54 –<br>0.82)                             | 0.694   |
| <b>UVA<math>\geq</math>2</b>        | 0.60 (0.26 –<br>0.88)   | 0.58 (0.50<br>–0.66)    | 0.09 (0.05<br>-0.14)  | 0.95 (0.90<br>-0.98) | 0.59 (0.44 –<br>0.73)                                           | 0.70 (0.50 –<br>0.87)                             | 0.281   |

1  
2  
3  
4  
5  
6  
7  
8  
9  
10  
11  
12  
13  
14  
15  
16  
17  
18  
19  
20  
21  
22  
23  
24  
25  
26  
27  
28  
29  
30  
31  
32  
33  
34  
35  
36  
37  
38  
39  
40  
41  
42  
43  
44  
45  
46  
47  
48  
49  
50  
51  
52  
53  
54  
55  
56  
57  
58  
59  
60



**Supplementary Figure S1.** Distribution of adjudicated pathogen class for each site.



**Supplementary Figure S2.** Prevalence of antibiotics received per site.



**Supplementary Figure S3.** Forest plot of hazard ratios from bivariate Cox regression models for risk of death at 28-day for sepsis scores, physiologic parameters, and clinical laboratory parameters.

# BMJ Open

## Screening tools for predicting mortality of adults with suspected sepsis: an international sepsis cohort validation study

|                               |                                                                                                                                                                                                                                                                                                                                                                                                                                                                                                                                                                                                                                                                                                                                                                                                                                                                                                                                                                                                                                                                                                                                                                                                                                                                                                                                                                                                                                                                                                                                                                                                                                                                                                                                                                                                                                                                                                                                                                                                                                                                                                   |
|-------------------------------|---------------------------------------------------------------------------------------------------------------------------------------------------------------------------------------------------------------------------------------------------------------------------------------------------------------------------------------------------------------------------------------------------------------------------------------------------------------------------------------------------------------------------------------------------------------------------------------------------------------------------------------------------------------------------------------------------------------------------------------------------------------------------------------------------------------------------------------------------------------------------------------------------------------------------------------------------------------------------------------------------------------------------------------------------------------------------------------------------------------------------------------------------------------------------------------------------------------------------------------------------------------------------------------------------------------------------------------------------------------------------------------------------------------------------------------------------------------------------------------------------------------------------------------------------------------------------------------------------------------------------------------------------------------------------------------------------------------------------------------------------------------------------------------------------------------------------------------------------------------------------------------------------------------------------------------------------------------------------------------------------------------------------------------------------------------------------------------------------|
| Journal:                      | <i>BMJ Open</i>                                                                                                                                                                                                                                                                                                                                                                                                                                                                                                                                                                                                                                                                                                                                                                                                                                                                                                                                                                                                                                                                                                                                                                                                                                                                                                                                                                                                                                                                                                                                                                                                                                                                                                                                                                                                                                                                                                                                                                                                                                                                                   |
| Manuscript ID                 | bmjopen-2022-067840.R3                                                                                                                                                                                                                                                                                                                                                                                                                                                                                                                                                                                                                                                                                                                                                                                                                                                                                                                                                                                                                                                                                                                                                                                                                                                                                                                                                                                                                                                                                                                                                                                                                                                                                                                                                                                                                                                                                                                                                                                                                                                                            |
| Article Type:                 | Original research                                                                                                                                                                                                                                                                                                                                                                                                                                                                                                                                                                                                                                                                                                                                                                                                                                                                                                                                                                                                                                                                                                                                                                                                                                                                                                                                                                                                                                                                                                                                                                                                                                                                                                                                                                                                                                                                                                                                                                                                                                                                                 |
| Date Submitted by the Author: | 02-Feb-2023                                                                                                                                                                                                                                                                                                                                                                                                                                                                                                                                                                                                                                                                                                                                                                                                                                                                                                                                                                                                                                                                                                                                                                                                                                                                                                                                                                                                                                                                                                                                                                                                                                                                                                                                                                                                                                                                                                                                                                                                                                                                                       |
| Complete List of Authors:     | <p>Blair, Paul; Henry M Jackson Foundation for the Advancement of Military Medicine Inc, Austere environments Consortium for Enhanced Sepsis Outcomes (ACESO)</p> <p>Mehta, Rittal; Henry M Jackson Foundation for the Advancement of Military Medicine Inc</p> <p>Oppong, Chris; Komfo Anokye Teaching Hospital, Emergency Medicine</p> <p>Tin, Som; Takeo Provincial Referral Hospital</p> <p>Ko, Emily; Duke University School of Medicine</p> <p>Tsalik, Ephraim ; Duke University School of Medicine</p> <p>Chenoweth, Josh; Henry M Jackson Foundation for the Advancement of Military Medicine Inc</p> <p>Rozo, Michelle; Henry M Jackson Foundation for the Advancement of Military Medicine Inc</p> <p>Adams, Nehkonti; Naval Medical Research Center Infectious Diseases Directorate</p> <p>Beckett, Charmagne; Naval Medical Research Center Infectious Diseases Directorate</p> <p>Woods, Christopher; Duke University School of Medicine; Duke Global Health Institute</p> <p>Striegel, Deborah; Henry M Jackson Foundation for the Advancement of Military Medicine Inc</p> <p>Salvador, Mark G; Henry M Jackson Foundation for the Advancement of Military Medicine Inc</p> <p>Brandsma, Joost; Henry M Jackson Foundation for the Advancement of Military Medicine Inc</p> <p>McKean, Lauren; Henry M Jackson Foundation for the Advancement of Military Medicine Inc</p> <p>Mahle, Rachael; Duke University School of Medicine</p> <p>Hulsey, William R; Henry M Jackson Foundation for the Advancement of Military Medicine Inc</p> <p>Krishnan, Subramaniam; Henry M Jackson Foundation for the Advancement of Military Medicine Inc</p> <p>Prouty, Michael; US Naval Medical Research Unit No 2</p> <p>Letizia, Andrew; Naval Medical Research Unit-3 Ghana Detachment</p> <p>Fox, Anne; Naval Medical Research Unit-3 Ghana Detachment</p> <p>Faix, Dennis; US Naval Medical Research Unit No 2</p> <p>Lawler, James V; University of Nebraska Medical Center, Global Center for Health Security; University of Nebraska Medical Center, Department of Internal Medicine</p> |

|                                 |                                                                                                                                                                                                                                                                                                                                                                                                                                                                                                                                                                                                                                                                                                                                                                                 |
|---------------------------------|---------------------------------------------------------------------------------------------------------------------------------------------------------------------------------------------------------------------------------------------------------------------------------------------------------------------------------------------------------------------------------------------------------------------------------------------------------------------------------------------------------------------------------------------------------------------------------------------------------------------------------------------------------------------------------------------------------------------------------------------------------------------------------|
|                                 | Duplessis, Chris; Austere environments Consortium for Enhanced Sepsis Outcomes (ACESO), Biological Defense Research Directorate, Naval Medical Research Center-Frederick<br>Gregory, Michael; Austere environments Consortium for Enhanced Sepsis Outcomes (ACESO), Biological Defense Research Directorate, Naval Medical Research Center-Frederick<br>Vantha, Te; Takeo Provincial Referral Hospital<br>Owusu-Ofori, Alex Kwame; Komfo Anokye Teaching Hospital<br>Ansong, Daniel; Komfo Anokye Teaching Hospital, Emergency Medicine<br>Oduro, George; Komfo Anokye Teaching Hospital<br>Schully, Kevin; Henry M Jackson Foundation for the Advancement of Military Medicine Inc<br>Clark, Danielle; Henry M Jackson Foundation for the Advancement of Military Medicine Inc |
| <b>Primary Subject Heading</b>: | Global health                                                                                                                                                                                                                                                                                                                                                                                                                                                                                                                                                                                                                                                                                                                                                                   |
| Secondary Subject Heading:      | Intensive care, Infectious diseases, Evidence based practice                                                                                                                                                                                                                                                                                                                                                                                                                                                                                                                                                                                                                                                                                                                    |
| Keywords:                       | INFECTIOUS DISEASES, Adult intensive & critical care < INTENSIVE & CRITICAL CARE, Epidemiology < INFECTIOUS DISEASES, Tropical medicine < INFECTIOUS DISEASES, Public health < INFECTIOUS DISEASES                                                                                                                                                                                                                                                                                                                                                                                                                                                                                                                                                                              |
|                                 |                                                                                                                                                                                                                                                                                                                                                                                                                                                                                                                                                                                                                                                                                                                                                                                 |

SCHOLARONE™  
Manuscripts

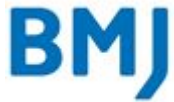

I, the Submitting Author has the right to grant and does grant on behalf of all authors of the Work (as defined in the below author licence), an exclusive licence and/or a non-exclusive licence for contributions from authors who are: i) UK Crown employees; ii) where BMJ has agreed a CC-BY licence shall apply, and/or iii) in accordance with the terms applicable for US Federal Government officers or employees acting as part of their official duties; on a worldwide, perpetual, irrevocable, royalty-free basis to BMJ Publishing Group Ltd ("BMJ") its licensees and where the relevant Journal is co-owned by BMJ to the co-owners of the Journal, to publish the Work in this journal and any other BMJ products and to exploit all rights, as set out in our [licence](#).

The Submitting Author accepts and understands that any supply made under these terms is made by BMJ to the Submitting Author unless you are acting as an employee on behalf of your employer or a postgraduate student of an affiliated institution which is paying any applicable article publishing charge ("APC") for Open Access articles. Where the Submitting Author wishes to make the Work available on an Open Access basis (and intends to pay the relevant APC), the terms of reuse of such Open Access shall be governed by a Creative Commons licence – details of these licences and which [Creative Commons](#) licence will apply to this Work are set out in our licence referred to above.

Other than as permitted in any relevant BMJ Author's Self Archiving Policies, I confirm this Work has not been accepted for publication elsewhere, is not being considered for publication elsewhere and does not duplicate material already published. I confirm all authors consent to publication of this Work and authorise the granting of this licence.

1  
2  
3 1 **Title:** Screening tools for predicting mortality of adults with suspected sepsis: an international sepsis  
4 cohort validation study

5 2  
6  
7 3 **Authors:** Paul W. Blair<sup>1,2\*</sup>, Rittal Mehta<sup>1</sup>, Chris Oppong<sup>3</sup>, Tin Som<sup>4</sup>, Emily R. Ko<sup>5</sup>, Ephraim L. Tsalik<sup>5</sup>,  
8 Josh Chenoweth<sup>1</sup>, Michelle Rozo<sup>1</sup>, Nehkonti Adams<sup>6</sup>, Charmagne Beckett<sup>6</sup>, Christopher W. Woods<sup>5</sup>,  
9 Deborah A. Striegel<sup>1</sup>, Mark Salvador<sup>1</sup>, Joost Brandsma<sup>1</sup>, Lauren McKean<sup>1</sup>, Rachael E. Mahle<sup>5</sup>, William  
10 Hulsey<sup>1</sup>, Subramaniam Krishnan<sup>1</sup>, Michael Prouty<sup>7</sup>, Andrew Letizia<sup>8</sup>, Anne Fox<sup>8</sup>, Dennis Faix<sup>7</sup>, James V.  
11 Lawler<sup>9</sup>, Chris Duplessis<sup>10</sup>; Michael G Gregory<sup>10</sup>, Te Vantha<sup>4</sup>, Alex Owusu-Ofori<sup>3</sup>, Daniel Ansong<sup>3</sup>,  
12 George Oduro<sup>3</sup>, Kevin L. Schully<sup>1,10</sup>, and Danielle V. Clark<sup>1</sup>.

13  
14  
15  
16  
17  
18  
19  
20  
21 9 **Affiliation:**

22  
23 10 <sup>1</sup>Austere environments Consortium for Enhanced Sepsis Outcomes (ACESO), Henry M. Jackson  
24 Foundation for the Advancement of Military Medicine, Inc., Bethesda, MD, United States of America.  
25 11 <sup>2</sup>Johns Hopkins University School of Medicine, MD, United States of America. <sup>3</sup>Komfo Anokye  
26 Teaching Hospital, Kumasi, Ghana. <sup>4</sup>Takeo Provincial Referral Hospital, Takeo, Cambodia. <sup>5</sup>Duke  
27 University Division of Infectious Diseases, Duke University School of Medicine, Durham, NC, USA.  
28 12 <sup>6</sup>Naval Medical Research Center Infectious Diseases Directorate, Bethesda, MD. <sup>7</sup>Naval Medical  
29 Research Unit-2, Phnom Penh, Cambodia. <sup>8</sup>Naval Medical Research Unit-3 Ghana Detachment, Accra,  
30 Ghana. <sup>9</sup>Global Center for Health Security at Nebraska and Division of Infectious Disease, Department of  
31 Internal Medicine, University of Nebraska Medical Center, Omaha, NE, United States of America.  
32 13 <sup>10</sup>Austere environments Consortium for Enhanced Sepsis Outcomes (ACESO), Biological Defense  
33 Research Directorate, Naval Medical Research Center-Frederick, Ft. Detrick, MD, United States of  
34 America  
35 21

36  
37 22

38  
39 23

40  
41 24

42  
43 25

44  
45 26

46  
47 27

48  
49 28

50  
51  
52 29 **\*Corresponding Author:** Paul W. Blair, MD MSPH MHS. Henry M. Jackson Foundation for the  
53 Advancement of Military Medicine. 6720A Rockledge Dr, Bethesda, MD 20817. E-mail:

54 30  
55  
56 31 [pblair6@jhmi.edu](mailto:pblair6@jhmi.edu)



32

**Abstract:**

Word count: 276

**Objectives:** We evaluated the performance of commonly used sepsis screening tools across prospective sepsis cohorts in the United States, Cambodia, and Ghana.

**Design:** Prospective cohort studies

**Setting and participants:** From 2014 to 2021, participants with 2 or more SIRS (Systemic Inflammatory Response Syndrome) criteria and suspected infection were enrolled in emergency departments and medical wards at hospitals in the Cambodia and Ghana and hospitalized participants with suspected infection were enrolled in the United States. Cox proportional hazards regression was performed, and Harrell's C-statistic calculated to determine 28-day mortality prediction performance of the qSOFA score  $\geq 2$ , SIRS score  $\geq 3$ , NEWS  $\geq 5$ , MEWS  $\geq 5$ , or UVA score  $\geq 2$ . Screening tools were compared to baseline risk (age and sex) with the Wald test.

**Results:** The cohorts included 567 participants (42.9% female) including 187 participants from Kumasi, Ghana, 200 participants from Takeo, Cambodia, and 180 participants from Durham, North Carolina in the United States. The pooled mortality was 16.4% at 28-days. The mortality prediction accuracy increased from baseline risk with the MEWS (C-statistic: 0.63, 95% CI: 0.58, 0.68;  $p=0.002$ ), NEWS (C-statistic: 0.68; 95% confidence interval [CI]: 0.64, 0.73;  $p<0.001$ ), qSOFA (C-statistic: 0.70, 95% CI: 0.64, 0.75;  $p<0.001$ ), UVA score (C-statistic: 0.73, 95% CI: 0.69, 0.78;  $p<0.001$ ), but not with SIRS (0.60; 95% CI: 0.54, 0.65;  $p=0.13$ ). Within individual cohorts, only the UVA score in Ghana performed better than baseline risk (C-statistic: 0.77; 95% CI: 0.71, 0.83;  $p<0.001$ ).

**Conclusions:** Among the cohorts, MEWS, NEWS, qSOFA, and UVA scores performed better than baseline risk, largely driven by accuracy improvements in Ghana, while SIRS scores did not improve prognostication accuracy. Prognostication scores should be validated within the target population prior to clinical use.

**Keywords:** Analysis, Survival; sepsis; Cohort Studies; Prognosis; Global Health

1  
2  
3 58  
45 59 **Strengths and limitations of this study:**  
6

- 7 60 • This study includes two well-characterized sepsis cohorts in low- and middle-income countries  
8 (LMICs) and a cohort in a high-resource setting for comparison.  
9  
10 61  
11  
12 62 • The performance characteristics of five commonly used sepsis screening tools for predicting 28-  
13 day death was compared to baseline risk after adjustment for multiple comparisons.  
14 63  
15  
16 64 • Diagnostic testing differed at each site and mortality specifically due to sepsis could not be  
17 determined.  
18 65  
19  
20 66 • Enrolment was by convenience sampling within the referral hospital catchment area and may not  
21 be representative of the general population within these countries.  
22 67  
23  
24 68 • Sample size limitations in each of the cohorts may have led to decreased ability to identify  
25 differences between each screening tool.  
26 69  
27  
28  
29 70  
30  
31 71

32  
33 72 **Narrative:**  
3435 73 Word count: 3,883  
36  
37 74  
3839 75 INTRODUCTION  
40

41 76 Sepsis, a syndrome resulting from a systemic dysregulated host response to an infection, is estimated to  
42 cause six million deaths per year but is likely an underestimate due to limited information from low- and  
43 middle-income countries (LMICs) where 87% of the world population live [1]. Despite declining age-  
44 standardized incidence and mortality, sepsis remains a major cause of health loss worldwide and has an  
45 especially high health-related burden in LMICs[2].  
46 78  
47 79  
48 80  
49  
50  
51

52 81  
53  
54  
55  
56  
57  
58  
59  
60

1  
2  
3 82 Clinical sepsis guidelines developed in the Western world may not be applicable in resource-limited settings  
4  
5 83 and moreover can lead to detrimental effects on sepsis care and management when applied in these  
6  
7 84 conditions due to decreased access to resources to manage iatrogenesis from fluid resuscitation [3, 4]. In  
8  
9 85 contrast to the United States, pathogens that lead to directly lead to vascular injury are common causes of  
10  
11 86 acute febrile illness in Cambodia and Ghana such as dengue virus, malaria, or rickettsia and may alter  
12  
13 87 empiric treatment response [5]. While early recognition and treatment of sepsis is critical, most sepsis scores  
14  
15 88 or early warning systems were derived from cohorts outside of LMICs. Differences in causes of sepsis,  
16  
17 89 available treatments, and available resources for supportive care should affect management strategies but  
18  
19 90 evidence is limited and optimal clinical scores or biomarkers for sepsis identification are unknown in these  
20  
21 91 settings. Multi-site international sepsis studies are essential for evaluating current and future sepsis tools to  
22  
23 92 ensure effectiveness in resource-limited settings and across populations.  
24  
25

26 93  
27  
28 94 The most validated prognostication scores, SOFA (Sequential Organ Failure Assessment) and the  
29  
30 95 APACHE IV, have been developed for prognostication but require an arterial blood gas and multiple  
31  
32 96 laboratory parameters [6, 7] that are not widely available in low-resource settings. The qSOFA (quick  
33  
34 97 SOFA) is an abbreviated score that does not require laboratory parameters. The qSOFA is one of the most  
35  
36 98 widely adopted sepsis screening tools and has largely replaced the SIRS (Systemic Inflammatory Response  
37  
38 99 Syndrome) criteria as the standard abbreviated sepsis screening tool as part of the Sepsis-3 definition to  
39  
40 100 identify septic patients [8]. The qSOFA and other sepsis screening tools (i.e., Modified Early Warning  
41  
42 101 Score [MEWS], National Early Warning Score [NEWS], and Universal Vital Assessment [UVA]) are often  
43  
44 102 used clinically to identify those at risk of sepsis, but these tools have been studied for their ability to  
45  
46 103 prognosticate mortality or poor composite outcomes among hospitalized adults[9-12]. Studies have  
47  
48 104 evaluated these tools for predicting in-hospital mortality but the performance of these tools and the  
49  
50 105 prevalence of 28-day mortality, a common metric of sepsis outcomes, have yet to be described across both  
51  
52 106 high- and low-resource settings using similar methods [9, 13, 14].  
53  
54  
55

56 107  
57  
58  
59  
60

1  
2  
3 108 We used prospective multi-site international cohorts that are part of the Austere environments Consortium  
4  
5 109 for Enhanced Sepsis Outcomes (ACESO) consortium to validate commonly used sepsis screening tools  
6  
7 110 [15]. In contrast to APACHE IV and SOFA, these tools can be quickly performed with limited laboratory  
8  
9 111 test results. We hypothesized that qSOFA may perform poorly in LMIC populations compared to the UVA  
10  
11 112 score due to differences in causes of sepsis. We describe the diverse clinical characteristics, the aetiologies  
12  
13 113 of suspected sepsis within these cohorts, and the performance of sepsis screening tools in current clinical  
14  
15 114 use for predicting mortality at one month post enrolment.  
16  
17  
18 115

## 19 20 116 METHODS

21  
22 117 From May 2014 to November 2015, 200 participants were enrolled into a prospective observational study  
23  
24 118 of sepsis at Takeo Provincial Hospital in Takeo Province Cambodia [16] (Figure 1). This study was  
25  
26 119 followed by a prospective study at Duke University Hospital in Durham, North Carolina, which enrolled  
27  
28 120 180 participants from December 2014 to March 2016. In Kumasi, Ghana, 187 participants were enrolled at  
29  
30 121 Komfo Anokye Teaching Hospital from July 2016 to October 2017.  
31  
32  
33

34 122 Hospitalized patients  $\geq 18$  years of age whose attending physician judged them to have an active infection  
35  
36 123 were considered for inclusion for each of the three cohorts. Additional inclusion and exclusion criteria  
37  
38 124 were required in Cambodia and Ghana but not required in the United States protocol. In Cambodia and  
39  
40 125 Ghana, participants were required to meet least two clinical criteria for systemic inflammatory response  
41  
42 126 syndrome (SIRS) during screening. In Cambodia and Ghana, patients were excluded if they had known  
43  
44 127 malignancy, chronic renal/hepatic insufficiency, immunosuppressive conditions (except HIV) or systemic  
45  
46 128 steroid usage that exceeded 20mg/day to prevent confounding in future biomarker studies. Patients were  
47  
48 129 also excluded in Cambodia and Ghana if they had a history of organ transplant, hemodynamically  
49  
50 130 significant gastrointestinal bleeding, anatomic or functional asplenia, acute cardiovascular disease,  
51  
52 131 general anaesthesia, or surgery in the past week prior to enrolment, women who were pregnant, patients  
53  
54  
55  
56  
57  
58  
59  
60

1  
2  
3 132 who had a haemoglobin less than 7 g/dL or weighed less than 35kg. Hospital physicians who deemed  
4  
5 133 their patients too ill to participate could defer enrolment.  
6  
7

8 134 *Study procedures*  
9

10 135 Following informed consent, study team members conducted a detailed medical history, including prior  
11  
12 136 medications, and physical exam. Responses were recorded on a standardized case report form and  
13  
14 137 included demographics, medical history, physical exam findings, and admission diagnoses. Study specific  
15  
16 138 procedures conducted in Cambodia were described in detail by Rozo et al [17]. Similar enrolment and  
17  
18 139 study procedures were followed in Kumasi, Ghana and in Durham, North Carolina, USA. Blood was  
19  
20 140 collected at the time of enrolment, then at 6 hours later, and at 24 hours later. In Ghana and Cambodia,  
21  
22 141 standardized clinical tests included a peripheral venous blood gas with lactate, complete blood count,  
23  
24 142 complete metabolic panel, optional HIV screening with consent (Alere Determine HIV1/2, Abbott, OK,  
25  
26 143 United States), malaria rapid diagnostic tests (SD Bioline Ag. P.f./Pan, Abbott, OK, United States) and  
27  
28 144 aerobic blood cultures (one aerobic bottle, Bactec 9050, BD, NJ, United States) as part of study  
29  
30 145 procedures in Ghana and Cambodia. Microbiologic results were available if collected through routine  
31  
32 146 clinical care across cohorts. Additional molecular testing and next generation sequencing for pathogens  
33  
34 147 were also performed on blood samples in the Cambodia cohort as previously described [17]. Participants  
35  
36 148 were followed throughout their hospitalization and a record review performed at discharge.  
37  
38  
39  
40

41 149 An interview was performed, and blood samples were collected at a 28-day follow-up visit across cohorts.  
42  
43 150 When patients could not return in person, study team members attempted to conduct an interview with  
44  
45 151 patients or a legally authorized representative by telephone. Fatal outcomes among each discharged  
46  
47 152 participant were also determined.  
48  
49  
50

51 153 Using clinical data from case report forms and microbiology diagnostic information, clinical adjudication  
52  
53 154 was performed by three physician reviewers (internal medicine or infectious diseases) to determine the  
54  
55 155 source of infection by anatomic location and pathogen class (i.e., bacterial, parasitic, viral, or fungal).  
56  
57  
58  
59  
60

1  
2  
3 156 This was graded on a low, moderate, and high level of confidence by two independent reviewers and a  
4  
5 157 third reviewer served as a tiebreaker for discordant conclusions. If the third reviewer did not agree with  
6  
7 158 either adjudicator, then the decision was determined by committee. Microbiologic results presented  
8  
9 159 include those adjudicated to be clinically relevant to participant's acute illness.  
10  
11

### 12 160 *Patient and Public Involvement*

13  
14  
15 161 Patients were not involved in recruitment, design, conduct, or dissemination plans of our research. Results  
16  
17 162 of this study were disseminated to hospital and clinical leadership at Takeo Provincial Hospital and  
18  
19 163 Komfo Anokye Teaching Hospital.  
20

21 164

### 22 23 165 *Statistical analysis*

24  
25 166 Summary statistics were calculated for the cohorts individually and pooled, comparing baseline  
26  
27 167 demographics (e.g., gender, age, ethnicity, selected medical comorbidities), baseline screening tool  
28  
29 168 scores, physiologic parameters, baseline clinical laboratory values using either Chi-square (categorical  
30  
31 169 values), Fishers exact (categorical values), or Kruskal-Wallis (continuous values) tests. Prevalence of  
32  
33 170 diagnoses were described for each cohort by organ system and pathogen type and by anatomic site.  
34  
35

36 171

37  
38 172 After checking the proportional hazards assumption, Cox regression was performed with bivariate models  
39  
40 173 to evaluate increased risk of death in each cohort by baseline demographics, comorbid conditions,  
41  
42 174 physiologic parameters, and clinical laboratory parameters. Physiologic parameters and clinical laboratory  
43  
44 175 parameters were modelled as dichotomous or ordinal parameters at clinically relevant abnormal range cut  
45  
46 176 offs (e.g., blood urea nitrogen  $\geq 20$ mg/dL) to explore associations with increased risk of death and for  
47  
48 177 clinical inference. Screening tools were dichotomized according to current usage, including qSOFA score  
49  
50 178  $\geq 2$  (range, 0 [best] to 3 [worst] points), SIRS score  $\geq 2$  (range, 0 [best] to 4 [worst] points), MEWS  $\geq 5$   
51  
52 179 (range, 0 [best] to 13 [worst] points), NEWS  $\geq 5$  (range, 0 [best] to 20 [worst] points), and UVA  $\geq 2$   
53  
54 180 (range, 0 [best] to 13 [worst])[13] and were evaluated in Cox regression models unadjusted and adjusted  
55  
56  
57  
58  
59  
60

1  
2  
3 181 for age and sex for risk of death [9]. Glasgow Coma Scale Score (GCS; range, 3 [worst] to 15 [best]  
4  
5 182 points) of less than 15 was used for estimation of the qSOFA score, and a GCS of  $\leq 3$  for  
6  
7 183 unresponsiveness for NEWS, and GCS score 3-15 for the “alert, verbal, pain, unresponsive” scale  
8  
9 184 (AVPU; alert: GCS 13-15, voice: GCS 9-12; pain: GCS 4-8; unresponsiveness: GCS  $\leq 3$ ) score  
10  
11 185 approximation for MEWS [18, 19]. Data was administratively right censored past 28 days. The Harrell’s  
12  
13 186 C-statistic was calculated for each screening tool for each cohort, the cohorts combined, and Cambodia  
14  
15 187 and Ghana cohorts pooled [20]. This statistic is a performance analogous to area under the receiver  
16  
17 188 operating characteristic curve (AUROC) but accounts for differences over time with survival outcomes.  
18  
19 189 C-statistic confidence interval estimates were determined.[21] The Cox regression Wald test p-values  
20  
21 190 were calculated for each score covariate adjusting for baseline risk estimated by age and sex to determine  
22  
23 191 if scores improved model accuracy above baseline risk [9, 22]. Adjustment was limited to age and sex  
24  
25 192 covariates to avoid introducing confounding (e.g., ascertainment bias from past medical history), type I  
26  
27 193 error from multiple comparisons, or overfitting. P-values  $< 0.002$  were considered significant using a  
28  
29 194 Bonferroni correction for multiple comparisons. Cohort sample sizes were determined a priori through  
30  
31 195 Monte Carlo simulation modelling for prognostic biomarker identification. All statistical analyses were  
32  
33 196 performed in SAS (Statistical Analytical Software, version 9.4), R version 4.0.2 [23] or Stata (version  
34  
35 197 15.0; StataCorp LLC, College Station, TX, USA) [24].  
36  
37  
38  
39  
40

## 41 199 RESULTS

### 42 200 *Summary demographics, sepsis severity, and laboratory findings*

43 201 There were 567 participants across the cohorts including 187 from Kumasi, Ghana, 200 from Takeo,  
44  
45 202 Cambodia, and 180 from Durham, North Carolina, United States (**Figure 1**). The study population was  
46  
47 203 predominantly male (57.1% male), with more male participants enrolled in Cambodia than at other sites  
48  
49 204 (68.0% vs 55.0% in the U.S. and 52.4% in Ghana). The overall median age was 50 years (interquartile  
50  
51 205 range [IQR], 36 to 63), which was similar across cohorts (**Table 1**). Previously diagnosed comorbid  
52  
53  
54  
55  
56  
57  
58  
59  
60

206 conditions were most common at the U.S. site including a history of cardiovascular (65.6%; N=118),  
 207 respiratory (42.2%; N=76), or gastrointestinal (36.7%; N=66) conditions.

**Table 1.** Baseline demographic characteristics stratified by sites.

| Characteristic                    | Total<br>(n=567) | Takeo,<br>Cambodia<br>(n=200) | Durham,<br>USA<br>(n=180) | Kumasi,<br>Ghana<br>(n=187) | p-value** |
|-----------------------------------|------------------|-------------------------------|---------------------------|-----------------------------|-----------|
| Female gender – no. (%)           | 243 (42.9%)      | 64 (32.0%)                    | 81 (45.0%)                | 98 (52.4%)                  | < 0.001   |
| Age – years, median (IQR)         | 50 (36 – 63)     | 50 (36 – 62)                  | 52.5 (40 – 63)            | 46 (35 – 63)                | 0.151     |
| Medical history* – no. (%)        |                  |                               |                           |                             |           |
| Cancer                            | 44 (9.9%)        | 0 (0.0%)                      | 44 (24.4%)                | 0 (0.0%)                    | < 0.001   |
| Cardiovascular                    | 202 (41.4%)      | 22 (18.2%)                    | 118 (65.6%)               | 62 (33.2%)                  | < 0.001   |
| Dermatologic                      | 15 (3.1%)        | 1 (0.8%)                      | 14 (7.8%)                 | 0 (0.0%)                    | < 0.001   |
| Endocrine                         | 126 (25.8%)      | 6 (5.0%)                      | 74 (41.1%)                | 46 (24.6%)                  | < 0.001   |
| Gastrointestinal                  | 76 (15.6%)       | 4 (3.3%)                      | 66 (36.7%)                | 6 (3.2%)                    | < 0.001   |
| Genitourinary or reproductive     | 34 (7.0%)        | 1 (0.8%)                      | 33 (18.3%)                | 0 (0.0%)                    | < 0.001   |
| HIV                               | 26 (4.7%)        | 12 (6.2%)                     | 8 (4.5%)                  | 6 (3.2%)                    | 0.388     |
| Neurological                      | 62 (12.7%)       | 1 (0.8%)                      | 44 (24.4%)                | 17 (9.1%)                   | < 0.001   |
| Other                             | 206 (42.2%)      | 48 (39.7%)                    | 151 (83.9%)               | 7 (3.7%)                    | < 0.001   |
| Psychiatric                       | 143 (29.3%)      | 41 (33.9%)                    | 78 (43.3%)                | 24 (12.8%)                  | < 0.001   |
| Renal                             | 41 (8.4%)        | 0 (0.0%)                      | 41 (22.8%)                | 0 (0.0%)                    | < 0.001   |
| Respiratory                       | 89 (18.2%)       | 7 (5.8%)                      | 76 (42.2%)                | 6 (3.2%)                    | < 0.001   |
| Rheumatologic                     | 29 (5.9%)        | 1 (0.8%)                      | 28 (15.6%)                | 0 (0.0%)                    | < 0.001   |
| Surgery                           | 27 (5.5%)        | 0 (0.0%)                      | 22 (12.2%)                | 5 (2.7%)                    | < 0.001   |
| Baseline scores – no. (%)         |                  |                               |                           |                             |           |
| MEWS ( $\geq 4$ )                 | 315 (57.8%)      | 81 (40.7%)                    | 105 (65.6%)               | 129 (69.3%)                 | < 0.001   |
| NEWS score ( $\geq 5$ )           | 324 (61.6%)      | 90 (47.9%)                    | 98 (64.5%)                | 136 (73.1%)                 | < 0.001   |
| qSOFA ( $\geq 2$ )                | 139 (25.4%)      | 22 (11.1%)                    | 48 (29.6%)                | 69 (37.1%)                  | < 0.001   |
| SIRS ( $\geq 2$ )                 | 447 (81.8%)      | 125 (68.3%)                   | 157 (89.2%)               | 165 (88.2%)                 | < 0.001   |
| UVA ( $\geq 2$ )                  | 199 (37.8%)      | 47 (25.8%)                    | 68 (42.8%)                | 84 (45.4%)                  | < 0.001   |
| Baseline scores<br>(median [IQR]) |                  |                               |                           |                             |           |
| MEWS                              | 4 (3-6)          | 3 (2-5)                       | 1 (0-4)                   | 1 (1-2)                     | < 0.001   |



**Table 1.** Baseline demographic characteristics stratified by sites.

| Characteristic | Total<br>(n=567) | Takeo,<br>Cambodia<br>(n=200) | Durham,<br>USA<br>(n=180) | Kumasi,<br>Ghana<br>(n=187) | p-value** |
|----------------|------------------|-------------------------------|---------------------------|-----------------------------|-----------|
| NEWS           | 6 (3-8)          | 4 (2-7)                       | 7 (3-9)                   | 6 (4-8)                     | < 0.001   |
| qSOFA          | 1 (1-2)          | 1 (0-1)                       | 1 (0-2)                   | 1 (1-2)                     | < 0.001   |
| SIRS           | 2 (2-3)          | 2 (1-3)                       | 3 (2-3)                   | 3 (2-3)                     | < 0.001   |
| UVA            | 1 (0-3)          | 1 (0-2)                       | 1 (0-4)                   | 1 (0-4)                     | < 0.001   |

\*There were 79 subjects without comorbidity information in the Cambodia cohort. \*\*Categorical parameters compared with chi-squared test and numeric parameters compared with Kruskal-Wallis test. Not adjusted for multiple comparisons.

208 Clinical physiologic and laboratory value abnormalities at enrolment were common with median  
 209 respiratory rate at 24 (IQR: 20 to 30), the median white blood count elevated at  $12.05 \times 10^9$  cells/L (IQR:  
 210 8.13 to  $16.6 \times 10^9$  cells/L), and median lactate elevated at 2.27 mmol/L (IQR: 1.66 to 3.09 mmol/L)  
 211 (**Supplementary Table S1**). At enrolment, the proportion of an elevated qSOFA ( $\geq 2$ ) at baseline was  
 212 highest at the Ghana site with 44.4% (N=83) of participants compared to 26.0% (N=52) in Cambodia and  
 213 22.2% (N=40) in the United States. The SIRS, MEWS, NEWS, and UVA screening tools were similarly  
 214 higher in the Ghana cohort.

#### 215 216 *Pathogens detected*

217 The most common positive microbiologic results overall included bacteraemia (N=83), respiratory culture  
 218 growth (N=19), serum hepatitis B surface antigen (N=15), and malaria rapid diagnostic tests (N=11). A  
 219 minority (121 of 567, 21.3%) of subjects had confirmed infections with complete adjudicator agreement  
 220 using all available sources of clinical microbiologic results (with the notable addition of RNA sequencing  
 221 of samples from Cambodia[17]) including 90 (15.9%) bacterial, 17 viral (3.0%), 20 malarial (3.5%), and  
 222 2 (0.3%) fungal infections identified across all cohorts (**Supplementary Figure S1**). These infection  
 223 classes were different among sites (chi-squared test  $p < 0.001$ ).

224

1  
2  
3 225 In Cambodia, the most common bacterial infections with complete adjudicator agreement were *B.*  
4  
5 226 *pseudomallei* (N=10, with blood or respiratory culture growth), presumptive *M. tuberculosis* (N=5, with  
6  
7 227 acid fast positive smears), polymicrobial (N=5), and *O. tsutsugamushi* (N=4, determined by sequencing).  
8  
9 228 The most common causes of bacteraemia (17 total of 200 participants) were *B. pseudomallei* (N=8), *E.*  
10  
11 229 *coli* (N=3), and polymicrobial infections (N=3). Three participants had a positive malaria RDT. Fungal  
12  
13 230 infections were uncommon with 1 participant with non-albicans Candidemia and 1 with cryptococcal  
14  
15 231 meningitis. Two individuals had dengue fever (one PCR positive and one adjudicated IgM positive).  
16  
17 232  
18  
19 233 In Ghana, the most common causes of bacteraemia (culture growth from 28 of 187 participants) were *E.*  
20  
21 234 *coli* (N=6), *S. aureus* (N=6), *Salmonella spp.* (N=5), and *S. pneumoniae* (N=3). Nine participants had a  
22  
23 235 positive malaria RDT and 15 had a positive hepatitis B surface antigen.  
24  
25 236  
26  
27  
28 237 In the United States, the most common causes of bacteraemia (culture growth from 19 of 180  
29  
30 238 participants) were *E. coli* (N=5), *K. pneumoniae* (N=3), polymicrobial (N=2), *Pseudomonas spp.* (N=2),  
31  
32 239 or *S. aureus* (N=2). Viral infections detected by PCR included rhinovirus (N=5), influenza A (N=4),  
33  
34 240 respiratory syncytial virus (N=4), human immunodeficiency virus (N=3), and human metapneumovirus  
35  
36 241 (N=3). There was one participant with *Aspergillus fumigatus* fungal pneumonia.  
37  
38 242  
39  
40

#### 41 243 *Diagnoses and Treatments*

42  
43 244 Across cohorts, the most common organ system sites of infection were lower respiratory tract infection  
44  
45 245 (28.7%; N=163), multifocal or generalized source of infection (including malaria) (13.6%; N=77), and  
46  
47 246 gastrointestinal (including hepatic) (12.7%; N=72) (**Figure S1a**). The most common antibiotics  
48  
49 247 administered in United States, Ghana, and Cambodia were beta-lactam antibiotics (**Supplementary**  
50  
51 248 **Figure S2**), but antibiotic regimens varied widely among sites. The most common antibiotics classes used  
52  
53 249 were other antibacterials (e.g., glycopeptide antibiotics, 58.9%), beta-lactam antibacterials, penicillins  
54  
55 250 (51.7%), and cephalosporin and carbapenem antibacterials (44.4%) in the United States, cephalosporins  
56  
57  
58  
59  
60

1  
2  
3 251 and carbapenems (64.2%), macrolides, lincosamides and streptogramins (37.4%), and other antibacterials  
4  
5 252 (33.7%) in Ghana, and cephalosporins and carbapenems (73.0%), beta-lactam antibacterials, penicillins  
6  
7 253 (46.5%) and aminoglycoside antibacterials (39.0%) in Cambodia.  
8  
9  
10 254

### 11 255 *Survival*

12  
13 256 Among all cohorts, 16.4% (N=93) of participants had died at one month, including 58 (31.0%) in Ghana,  
14  
15 257 22 (11.0%) in Cambodia, and 13 (7.2%) in the U.S (**Figure 1**). Among those that died within one month,  
16  
17 258 median time to death was 4 days (IQR: 1 to 11) in Ghana, 7 days (IQR: 3 to 16) in Cambodia, 10 (IQR: 5  
18  
19 259 to 19) in the U.S., and 5 days (IQR: 2 to 13) overall. Parameters to calculate the qSOFA score and 28-day  
20  
21 260 mortality were available for 96.4% participants. Hyponatremia (>145 mEq/L) had the highest unadjusted  
22  
23 261 risk of death (hazard ratio 6.89, 95% CI: 3.43, 13.85) among parameters tested in bivariate models  
24  
25 262 (**Supplementary Figure S3**). All screening tools were associated with an increased risk of death (**Figure**  
26  
27 263 **2**) with the largest increase among those with an elevated UVA score (**Supplementary Figure S3**). For  
28  
29 264 individuals with a UVA  $\geq 2$  there was a 5.45 times increased risk of death (95% CI: 3.39 to 8.76; C-  
30  
31 265 statistic: 0.70) and those with a qSOFA  $\geq 2$  had a 4.11 times increased risk of death (95% CI: 2.71 to 6.22;  
32  
33 266 C-statistic: 0.66). Those with an elevated SIRS had a 1.81 times increased risk of death (95% CI: 0.94 to  
34  
35 267 3.50; C-statistic:0.53). Elevated NEWS (HR: 4.03; 95% CI: 2.24 to 7.26; C-statistic: 0.66) and MEWS  
36  
37 268 (HR: 2.03; 95% CI: 1.28 to 3.23; C-statistic: 0.53) had similarly increased risks (**Figure 3**).  
38  
39  
40  
41 269

42  
43 270 Accuracy in an adjusted Cox model was highest for UVA (0.73; 95% CI 0.68-0.78) followed by qSOFA  
44  
45 271 (C-statistic: 0.70; 95% CI: 0.64 to 0.75) (**Table 2**). The sensitivity for predicting death was highest with  
46  
47 272 SIRS (89%; 95% CI: 80 to 94%) but specificity was lowest (19%; 95% CI: 16 to 26%). The UVA score  
48  
49 273 had a sensitivity of 74% and specificity of 70%. The qSOFA score had the lowest sensitivity (54%; 95%  
50  
51 274 CI: 44 to 65%) but highest specificity (80%; 95% CI: 76 to 84%). We observed that the qSOFA  
52  
53 275 discrimination for mortality was moderate with a C-statistic of 0.70 adjusting for age and sex (**Figure 3**).  
54  
55 276 There was similar qSOFA accuracy in individual cohorts from the United States (C-statistic 0.71; 95%  
56  
57  
58  
59  
60

277 CI: 0.54 to 0.89), Cambodia (C-statistic: 0.68; 95% CI: 0.59 to 0.77), or Ghana (C-statistic: 0.72; 95% CI:  
 278 0.64 to 0.79) (**Figure 3**). Similarly, the UVA score had moderate accuracy with a C-statistics on 0.73  
 279 (95% CI: 0.68 to 0.78). Other screening scores had similar moderate C-statistic values. The SIRS C-  
 280 statistic was 0.60 (95% CI: 0.54 to 0.65). Among participants with a NEWS score of  $\geq 5$  (62% of the  
 281 pooled cohort), the C-statistic was 0.68 (95% CI: 0.64 to 0.73) and among those with a MEWS score of  
 282  $\geq 4$  (58% of the pooled cohort), the C-statistic was 0.63 (95% CI: 0.58 to 0.68) for death. The qSOFA and  
 283 UVA scores were significantly greater than baseline risk in Ghana in contrast to other scores or cohorts  
 284 (Table 3). The qSOFA score increased prognostication accuracy in the United States cohort with a  $p=0.02$   
 285 but this was not significant after correcting for multiple comparisons. In Cambodia, while not significant

**Table 2.** Performance characteristics of sepsis score across cohorts for predicting 28-day mortality.

| Score               | Sensitivity<br>(95% CI) | Specificity<br>(95% CI) | PPV<br>(95% CI)      | NPV<br>(95% CI)      | Unadjusted<br>Bivariate<br>Cox model<br>C-statistic<br>(95% CI) | Adjusted*<br>Cox<br>model<br>C-statistic<br>(95% CI) | p-value<br>(Wald<br>test) |
|---------------------|-------------------------|-------------------------|----------------------|----------------------|-----------------------------------------------------------------|------------------------------------------------------|---------------------------|
| Age and sex         | –                       | –                       | –                    | –                    | –                                                               | 0.59<br>(0.53,0.64)                                  |                           |
| MEWS $\geq 4$ *     | 0.73 (0.63,<br>0.82)    | 0.45 (0.40,<br>0.49)    | 0.21 (0.16,<br>0.26) | 0.89 (0.85,<br>0.93) | 0.59 (0.54,<br>0.63)                                            | 0.63<br>(0.58,0.68)                                  | <b>0.002**</b>            |
| NEWS $\geq 5$ *     | 0.86<br>(0.77,0.93)     | 0.43<br>(0.38,0.48)     | 0.25<br>(0.23,0.28)  | 0.93 (0.89,<br>0.95) | 0.65 (0.64,<br>0.67)                                            | 0.68<br>(0.64,0.73)                                  | <b>&lt;0.001**</b>        |
| qSOFA<br>$\geq 2$ * | 0.54 (0.44,<br>0.65)    | 0.80 (0.76,<br>0.84)    | 0.35 (0.27,<br>0.44) | 0.90 (0.87,<br>0.93) | 0.66 (0.61,<br>0.71)                                            | 0.70<br>(0.64,0.75)                                  | <b>&lt;0.001**</b>        |
| SIRS $\geq 2$ *     | 0.89 (0.80,<br>0.94)    | 0.19 (0.16,<br>0.23)    | 0.17 (0.14,<br>0.21) | 0.90 (0.82,<br>0.95) | 0.53 (0.50,<br>0.57)                                            | 0.60<br>(0.54,0.65)                                  | 0.134                     |
| UVA $\geq 2$ *      | 0.74<br>(0.64,<br>0.83) | 0.70 (0.65,<br>0.74)    | 0.33 (0.27,<br>0.40) | 0.93<br>(0.90,0.95)  | 0.70 (0.65,<br>0.74)                                            | 0.73<br>(0.68,0.78)                                  | <b>&lt;0.001**</b>        |

\*Adjusted Cox model C-statistic is adjusted for age and gender. Note: p-value are from Wald test of the adjusted Cox regression model.

\*\*Significant at  $p < 0.002$

286 after correction, NEWS ( $p=0.01$ ) and UVA ( $p=0.01$ ) scores increased accuracy greater than baseline risk.  
 287 When pooling LMIC cohorts (i.e., Ghana and Cambodia), after adjustment for age and sex, the qSOFA  
 288 (C-statistic: 0.71; 95% CI: 0.66 to 0.77) and UVA scores (C-statistic: 0.76; 95% CI: 0.71 to 0.81) had

**Table 3.** Performance characteristics of sepsis score across cohorts for predicting 28-day mortality stratified by site.

| Model              | Takeo, Cambodia      |         | Durham, USA          |         | Kumasi, Ghana        |         |
|--------------------|----------------------|---------|----------------------|---------|----------------------|---------|
|                    | C-statistic (95% CI) | p-value | C-statistic (95% CI) | p-value | C-statistic (95% CI) | p-value |
| <b>Age and Sex</b> | 0.68 (0.59, 0.78)    | –       | 0.68 (0.54, 0.81)    | –       | 0.57 (0.49, 0.64)    | –       |
| <b>MEWS</b>        | 0.68 (0.59, 0.78)    | 0.2102  | 0.68 (0.57, 0.79)    | 0.4991  | 0.63 (0.56, 0.70)    | 0.0097  |
| <b>NEWS</b>        | 0.73 (0.63, 0.83)    | 0.0106  | 0.71 (0.59, 0.84)    | 0.2557  | 0.64 (0.57, 0.70)    | 0.0022  |
| <b>qSOFA</b>       | 0.68 (0.59, 0.77)    | 0.5101  | 0.71 (0.54, 0.89)    | 0.0365  | 0.72 (0.64, 0.79)    | <0.001* |
| <b>SIRS</b>        | 0.69 (0.60, 0.78)    | 0.5020  | 0.69 (0.55, 0.83)    | 0.5831  | 0.58 (0.51, 0.65)    | 0.1882  |
| <b>UVA</b>         | 0.71 (0.60, 0.83)    | 0.0109  | 0.70 (0.55, 0.85)    | 0.4753  | 0.77 (0.71, 0.83)    | <0.001* |

Note: p-value are from Wald test of the adjusted Cox regression model. Each model is adjusted for age and sex. \*Significant at p<0.002

289 higher accuracy compared with MEWS (C-statistic: 0.66 (95% CI 0.61 to 0.72), NEWS (C-statistic: 0.70  
 290 (95% CI: 0.65 to 0.76), and SIRS (C-statistic: 0.61; 95% CI: 0.55 to 0.67) (**Supplementary Table S2**). In  
 291 contrast, in the United States cohort, NEWS, MEWS, SIRS, qSOFA, and UVA scores after age and sex  
 292 adjustment each had similar accuracy with C-statistics ranging from 0.66 to 0.71 (**Table 3 and**  
 293 **Supplementary Table S3**).

## 295 DISCUSSION

296 In pooled prospective international cohorts in Cambodia, Ghana, and the United States, the UVA score  
 297 and Sepsis-3 (qSOFA) performed well with a C-statistic around 0.7 for predicting 28-day mortality.  
 298 However, this improvement was largely identified in the cohort in Ghana and the accuracy was no  
 299 different than baseline risk in the Cambodia cohort. There was a trend towards improving prognostication  
 300 accuracy with the NEWS and UVA score in Cambodia and only with the qSOFA score in the United  
 301 States. These results suggest that widely used sepsis screening tools may have varying performance for  
 302 prognostication in diverse settings with different treatment regimens and aetiologies of sepsis. Therefore,  
 303 screening tools should be selected after validation within populations prior to widespread adoption.

304

1  
2  
3 305 High sodium (hypernatremia) was associated with the highest risk of 28-day death among individual  
4  
5 306 clinical parameters. Hypernatremia during critical illness has been previously associated with mortality in  
6  
7 307 large observational studies from high resource settings [25, 26]. Hypernatremia can occur in sepsis due to  
8  
9 308 intravascular fluid loss due to breakdown of vascular cell junctions, insensible fluid losses, or dehydration  
10  
11 309 from the disease process [27]. There can also be an iatrogenic contribution from diuretics, sodium from  
12  
13 310 intravenous fluids, or with inadequate fluid resuscitation. Ultimately, there is not data available to  
14  
15 311 precisely determine the causes of hypernatremia among the participants in our cohorts. However, our  
16  
17 312 results highlight the universal risk of death among those with hypernatremia among those with sepsis and  
18  
19 313 emphasize the need for close management of fluid and electrolytes across critical care settings.  
20  
21  
22 314

23  
24 315 Current sepsis screening tools have had variable performance when applied for prognostication. SOFA or  
25  
26 316 APACHE scores have been developed specifically for prognostication but required parameters including  
27  
28 317 arterial blood oxygen saturation are often not available [9]. Performance of qSOFA and SIRS for  
29  
30 318 mortality have performed poorly (SIRS, area under the receiving operator curve [AUROC], 0.61; qSOFA:  
31  
32 319 AUROC, 0.61) for prognostication in high-resource settings intensive care unit (ICU ) settings [14] and in  
33  
34 320 diverse LMICs (adjusted SIRS: AUROC, 0.59; adjusted qSOFA: AUROC, 0.70) [9] in prior studies for  
35  
36 321 mortality prognostication. While qSOFA is generally more specific than other screening tools, it is less  
37  
38 322 sensitive than SIRS, MEWS, and NEWS, which is consistent with our data[28]. When applied to sepsis  
39  
40 323 identification, Surviving Sepsis 2021 guidelines recommend against solely using qSOFA, [29] due to  
41  
42 324 being a more specific rather than sensitive screening test. Additionally, qSOFA has been found to be  
43  
44 325 inferior to MEWS, and NEWS but more accurate and specific than SIRS for predicting in-hospital  
45  
46 326 mortality and ICU transfer in a large retrospective cohort of over 30 thousand patients in the United States  
47  
48 327 (NEWS: AUROC, 0.77; MEWS: AUROC, 0.73; qSOFA: AUROC, 0.69; SIRS: AUROC, 0.65) [28].  
49  
50 328 Different screening scores have been evaluated in prospective cohorts in sub-Saharan Africa (SSA)  
51  
52 329 previously in Tanzania (qSOFA: AUROC, 0.57; MEWS: AUROC, 0.49) [30] and Rwanda [31] (MEWS:  
53  
54 330 AUROC, 0.69; UVA: AUROC, 0.71; qSOFA: AUROC, 0.65) and in Gabon [32] (UVA: AUROC, 0.90;  
55  
56  
57  
58  
59  
60

1  
2  
3 331 qSOFA: AUROC, 0.77; MEWS: AUROC, 0.72; SIRS: AUROC, 0.70). Given the performance variability  
4  
5 332 that has been previously observed and was observed in this study, it is prudent to evaluate prediction  
6  
7 333 scores within the populations they serve prior to widespread promotion.  
8

9 334  
10  
11 335 The UVA score performed better than baseline risk in the Ghana cohort. Our results externally validated  
12  
13 336 the UVA score for use prognostication of hospitalized patients with suspected sepsis in Kumasi, Ghana  
14  
15 337 and potentially in the region when demographics are similar. The superiority of the UVA score in the  
16  
17 338 Ghana cohort could be related to similarities in infectious causes of illness with other countries in SSA  
18  
19 339 populations from which the UVA score was derived[12]. In contrast to the score derivation study[12],  
20  
21 340 UVA score performed similarly to qSOFA in Ghana. The accuracy of the UVA scores was not greater  
22  
23 341 than baseline risk in the cohort in Cambodia after adjustment for multiple comparisons. While  
24  
25 342 conclusions may be limited by sample size, sepsis scores derived from the regions of the world with more  
26  
27 343 similar infectious aetiologies may perform better. Our results highlight the importance of validating  
28  
29 344 scores in new patient populations prior to widespread use.  
30

31 345  
32  
33  
34  
35 346 This study had multiple limitations. First, exclusion criteria of immunocompromising conditions except  
36  
37 347 HIV may have led to a skewed populations from Ghana and Cambodia. These exclusion criteria were  
38  
39 348 created to decrease the effect of comorbid conditions or medications on immune biomarkers. However, in  
40  
41 349 Cambodia and Ghana, immunosuppressive medications or diagnoses of chronic liver or kidney disease  
42  
43 350 may be less common in the general population due to limited access to specialists or specialized  
44  
45 351 medications. Additionally, while there were differences in the baseline severity between cohorts, study  
46  
47 352 processes including inclusion criteria were largely standardized across sites improving the comparability  
48  
49 353 of the cohorts in diverse settings and baseline risk was adjusted in models using age and sex. Diagnostic  
50  
51 354 testing differed at each site and mortality specifically due to sepsis could not be determined. Enrolment  
52  
53 355 was by convenience sampling within the referral hospital catchment area and may not be representative of  
54  
55 356 the general population within these countries. Approximation of the mental status for the MEWS scoring  
56  
57  
58  
59

1  
2  
3 357 using GCS may not be generalizable to the use of GCS at other sites. However, similar MEWS and  
4  
5 358 NEWS performance was observed across sites. Lastly, due to the limited sample size in each of the  
6  
7 359 cohorts, smaller improvements in accuracy may not have been identified in the Cambodia and United  
8  
9 360 States cohorts that had less deaths compared to the Ghana cohort.

10  
11 361  
12  
13 362 Inexpensive and readily available tools are needed for triage in resource-limited areas in the world to help  
14  
15 363 identify patients that need escalation and possible transfer to higher levels of care. Current widely used  
16  
17 364 sepsis screening tools represent a clinical benchmark for the development of future triage tools. Research  
18  
19 365 is ongoing to assess point-of-care diagnostics within our sepsis cohort research network. Assays with  
20  
21 366 portable and low-cost inflammation biomarkers tests, molecular diagnostics, or point-of-care ultrasound  
22  
23 367 (POCUS) have the potential to augment the performance of clinical screening tools towards a more  
24  
25 368 personalized approach to sepsis recognition and triage.

26  
27 369  
28  
29  
30 370 CONCLUSION  
31  
32 371 Sepsis screening tools that are widely used during clinical care had sub-optimal performance for risk  
33  
34 372 stratification in three international cohorts with increased performance of the UVA and qSOFA scores in  
35  
36 373 Ghana compared to baseline risk. There remains a need for reliable, low-cost, and scalable  
37  
38 374 prognostication methods that are validated in diverse settings.

39  
40 375  
41  
42  
43 376 **Funding:** Defense Threat Reduction Agency (JSTO-CBA) to Naval Medical Research Center (NMRC)  
44  
45 377 (HDTRA1516108), Defense Health Bureau of Medicine & Surgery to NMRC for Combating Antibiotic  
46  
47 378 Resistance Bacteria (FY1819 0130.1832), Naval Medical Logistics Command Cooperative Agreement  
48  
49 379 (N626451920001).

50  
51  
52 380  
53  
54  
55  
56  
57  
58  
59  
60



1  
2  
3 381 **Conflicts of Interest:** ELT has held equity and consulted for Predigen and Biomeme, and he is an employee  
4  
5 382 of Danaher Diagnostics. All other authors declared no competing interests.  
6  
7

8 383  
9  
10 384 **Ethics approval:** Study protocols were approved by the Naval Medical Research Center (NMRC)  
11  
12 385 Institutional Review Board (IRB) (Cambodia sepsis study # NMRC.2013.0019; Ghana sepsis study #  
13  
14 386 NMRC.2016.0004-GHA; Duke sepsis study Duke#PRO00054849) in compliance with all applicable  
15  
16 387 Federal regulations governing the protection of human subjects as well as host country IRBs. The study  
17  
18 388 protocol in Cambodia was approved by the Cambodian National Ethics Committee for Health Research  
19  
20 389 (NECHR). The protocol in Ghana was approved by the Committee on Human Research, Publication and  
21  
22 390 Ethics (CHRPE) at Kwame Nkrumah University of Science & Technology. All procedures were in  
23  
24 391 accordance with the ethical standards of the Helsinki Declaration of the World Medical Association. All  
25  
26 392 patients, or their legally authorized representatives, provided written informed consent.  
27  
28  
29

30 393  
31  
32 394 **Disclaimer:** K.L.S. is an employee of the US government, and C.B, N.A., C.D., M.P., and A.L. are military  
33  
34 395 service members. This work was prepared as a part of official duties. Title 17 U.S.C. 105 provides that  
35  
36 396 ‘Copyright protection under this title is not available for any work of the United States Government.’ Title  
37  
38 397 17 U.S.C. 101 defines a U.S. Government work as a work prepared by a military service member or  
39  
40 398 employee of the U.S. Government as part of a person’s official duties. The views expressed reflect the  
41  
42 399 results of research conducted by the authors and do not necessarily reflect the official policy or position of  
43  
44 400 the Department of the Navy, Department of Defense, nor the United States Government.  
45  
46

47 401  
48  
49 402 **Contributorship Statement:** PWB, RM, JB, LM, DAS, REM performed data curation and analyses. PWB,  
50  
51 403 KLS, and DVC developed the manuscript concept. DVC and KLS provided resources for research  
52  
53 404 development. AL, KLS, CO, JC, TS, ERK, ELT, CB, CWW, AF, AL, DF, JVL, MP, MR, NA, CD, MGG,  
54  
55  
56  
57  
58  
59

1  
2  
3 405 TV, AO, DA, and GO were involved in protocol development and data generation. LM, MS, WH, SK, were  
4  
5 406 involved in research operations. AL, KLS, CWW, DF, ELT, CB, DVC, and PWB were involved in  
6  
7 407 manuscript revisions. All authors reviewed and approved of this manuscript.  
8  
9

10 408  
11  
12 409 **Data sharing statement:** De-identified data may be made available upon reasonable request to the  
13  
14 410 corresponding author.  
15  
16

17 411  
18  
19 412 **References**  
20

- 21 413 1. Reinhart, K., et al., *Recognizing Sepsis as a Global Health Priority - A WHO Resolution*. N Engl  
22  
23 414 J Med, 2017. **377**(5): p. 414-417.  
24  
25 415 2. Rudd, K.E., et al., *Global, regional, and national sepsis incidence and mortality, 1990-2017:*  
26  
27 416 *analysis for the Global Burden of Disease Study*. Lancet, 2020. **395**(10219): p. 200-211.  
28  
29 417 3. Maitland, K., et al., *Mortality after fluid bolus in African children with severe infection*. N Engl J  
30  
31 418 Med, 2011. **364**(26): p. 2483-95.  
32  
33 419 4. Andrews, B., et al., *Effect of an Early Resuscitation Protocol on In-hospital Mortality Among*  
34  
35 420 *Adults With Sepsis and Hypotension: A Randomized Clinical Trial*. Jama, 2017. **318**(13): p. 1233-  
36  
37 421 1240.  
38  
39 422 5. WHO, in *Dengue: Guidelines for Diagnosis, Treatment, Prevention and Control: New Edition*.  
40  
41 423 2009: Geneva.  
42  
43 424 6. Singer, M., et al., *The Third International Consensus Definitions for Sepsis and Septic Shock*  
44  
45 425 *(Sepsis-3)*. JAMA, 2016. **315**(8): p. 801-810.  
46  
47 426 7. Zimmerman, J.E., et al., *Acute Physiology and Chronic Health Evaluation (APACHE) IV:*  
48  
49 427 *hospital mortality assessment for today's critically ill patients*. Crit Care Med, 2006. **34**(5): p.  
50  
51 428 1297-310.  
52  
53  
54  
55  
56  
57  
58  
59  
60

- 1  
2  
3 429 8. Singer, M., et al., *The Third International Consensus Definitions for Sepsis and Septic Shock*  
4  
5 430 (*Sepsis-3*). *Jama*, 2016. **315**(8): p. 801-10.  
6  
7 431 9. Rudd, K.E., et al., *Association of the Quick Sequential (Sepsis-Related) Organ Failure*  
8  
9 432 *Assessment (qSOFA) Score With Excess Hospital Mortality in Adults With Suspected Infection in*  
10  
11 433 *Low- and Middle-Income Countries*. *Jama*, 2018. **319**(21): p. 2202-2211.  
12  
13 434 10. Subbe, C.P., et al., *Validation of a modified Early Warning Score in medical admissions*. *Qjm*,  
14  
15 435 2001. **94**(10): p. 521-6.  
16  
17 436 11. Smith, G.B., et al., *The ability of the National Early Warning Score (NEWS) to discriminate*  
18  
19 437 *patients at risk of early cardiac arrest, unanticipated intensive care unit admission, and death.*  
20  
21 438 *Resuscitation*, 2013. **84**(4): p. 465-70.  
22  
23 439 12. Moore, C.C., et al., *Derivation and validation of a universal vital assessment (UVA) score: a tool*  
24  
25 440 *for predicting mortality in adult hospitalised patients in sub-Saharan Africa*. *BMJ Glob Health*,  
26  
27 441 2017. **2**(2): p. e000344.  
28  
29 442 13. Adegbite, B.R., et al., *A comparison of different scores for diagnosis and mortality prediction of*  
30  
31 443 *adults with sepsis in Low-and-Middle-Income Countries: a systematic review and meta-analysis.*  
32  
33 444 *EClinicalMedicine*, 2021. **42**: p. 101184.  
34  
35 445 14. Raith, E.P., et al., *Prognostic Accuracy of the SOFA Score, SIRS Criteria, and qSOFA Score for*  
36  
37 446 *In-Hospital Mortality Among Adults With Suspected Infection Admitted to the Intensive Care*  
38  
39 447 *Unit*. *Jama*, 2017. **317**(3): p. 290-300.  
40  
41 448 15. Krishnan, S., et al., *Austere environments Consortium for Enhanced Sepsis Outcomes (ACESO).*  
42  
43 449 *Shock*, 2020. **53**(3): p. 377-378.  
44  
45 450 16. Schully, K.L., et al., *Melioidosis in lower provincial Cambodia: A case series from a prospective*  
46  
47 451 *study of sepsis in Takeo Province*. *PLoS Negl Trop Dis*, 2017. **11**(9): p. e0005923.  
48  
49 452 17. Rozo, M., et al., *An Observational Study of Sepsis in Takeo Province Cambodia: An in-depth*  
50  
51 453 *examination of pathogens causing severe infections*. *PLoS Negl Trop Dis*, 2020. **14**(8): p.  
52  
53 454 e0008381.  
54  
55  
56  
57  
58  
59  
60

- 1  
2  
3 455 18. Kelly, C.A., A. Upex, and D.N. Bateman, *Comparison of consciousness level assessment in the*  
4  
5 456 *poisoned patient using the alert/verbal/painful/unresponsive scale and the Glasgow Coma Scale.*  
6  
7 457 *Ann Emerg Med*, 2004. **44**(2): p. 108-13.  
8  
9 458 19. Nedeia, D. *AVPU Scale*. 18 January, 2022]; Available from: [https://www.mdapp.co/avpu-scale-](https://www.mdapp.co/avpu-scale-calculator-163/)  
10  
11 459 [calculator-163/](https://www.mdapp.co/avpu-scale-calculator-163/).  
12  
13 460 20. Harrell, F.E., Jr, et al., *Evaluating the Yield of Medical Tests*. *JAMA*, 1982. **247**(18): p. 2543-  
14  
15 461 2546.  
16  
17 462 21. Han, X., Y. Zhang, and Y. Shao, *On comparing 2 correlated C indices with censored survival*  
18  
19 463 *data*. *Stat Med*, 2017. **36**(25): p. 4041-4049.  
20  
21 464 22. Pepe, M.S., et al., *Testing for improvement in prediction model performance*. *Stat Med*, 2013.  
22  
23 465 **32**(9): p. 1467-82.  
24  
25 466 23. Team, T.R.D.C., *R: A language environment for statistical computing. R Foundation for*  
26  
27 467 *Statistical Computing*. 2020.  
28  
29 468 24. StataCorp, L., *Stata statistical software: release 16 College Station*. TX StataCorp LP, 2019.  
30  
31 469 25. Castello, L.M., et al., *Hypernatremia and moderate-to-severe hyponatremia are independent*  
32  
33 470 *predictors of mortality in septic patients at emergency department presentation: A sub-group*  
34  
35 471 *analysis of the need-speed trial*. *Eur J Intern Med*, 2021. **83**: p. 21-27.  
36  
37 472 26. Olsen, M.H., et al., *Association Between ICU-Acquired Hyponatremia and In-Hospital*  
38  
39 473 *Mortality: Data From the Medical Information Mart for Intensive Care III and the Electronic*  
40  
41 474 *ICU Collaborative Research Database*. *Crit Care Explor*, 2020. **2**(12): p. e0304.  
42  
43 475 27. Lindner, G. and G.C. Funk, *Hypernatremia in critically ill patients*. *J Crit Care*, 2013. **28**(2): p.  
44  
45 476 216.e11-20.  
46  
47 477 28. Churpek, M.M., et al., *Quick Sepsis-related Organ Failure Assessment, Systemic Inflammatory*  
48  
49 478 *Response Syndrome, and Early Warning Scores for Detecting Clinical Deterioration in Infected*  
50  
51 479 *Patients outside the Intensive Care Unit*. *Am J Respir Crit Care Med*, 2017. **195**(7): p. 906-911.  
52  
53  
54  
55  
56  
57  
58  
59  
60

- 1  
2  
3 480 29. Evans, L., et al., *Surviving sepsis campaign: international guidelines for management of sepsis*  
4  
5 481 *and septic shock 2021*. Intensive care medicine, 2021. **47**(11): p. 1181-1247.  
6  
7 482 30. Carugati, M., et al., *Predicting Mortality for Adolescent and Adult Patients with Fever in*  
8  
9 483 *Resource-Limited Settings*. Am J Trop Med Hyg, 2018. **99**(5): p. 1246-1254.  
10  
11 484 31. Klinger, A., et al., *Predicting mortality in adults with suspected infection in a Rwandan hospital:*  
12  
13 485 *an evaluation of the adapted MEWS, qSOFA and UVA scores*. BMJ Open, 2021. **11**(2): p.  
14  
15 486 e040361.  
16  
17 487 32. Schmedding, M., et al., *A Prospective Comparison of Quick Sequential Organ Failure*  
18  
19 488 *Assessment, Systemic Inflammatory Response Syndrome Criteria, Universal Vital Assessment,*  
20  
21 489 *and Modified Early Warning Score to Predict Mortality in Patients with Suspected Infection in*  
22  
23 490 *Gabon*. Am J Trop Med Hyg, 2019. **100**(1): p. 202-208.  
24  
25  
26 491

1  
2  
3  
4  
5  
6  
7  
8  
9  
10  
11  
12  
13  
14  
15  
16  
17  
18  
19  
20  
21  
22  
23  
24  
25  
26  
27  
28  
29  
30  
31  
32  
33  
34  
35  
36  
37  
38  
39  
40  
41  
42  
43  
44  
45  
46  
47  
48  
49  
50  
51  
52  
53  
54  
55  
56  
57  
58  
59  
60

**492 Figure Legends**

- 493 Figure 1. Enrolment flow diagram across cohorts.
- 494 Figure 2. Kaplan-Meier survival plot of 28-day mortality stratified by site.
- 495 Figure 3. The C-statistic by score overall and by cohort (adjusted for age and sex).
- 496
- 497

For peer review only

**Kumasi, Ghana**



**Durham, United States**



**Takeo, Cambodia**



1  
2  
3  
4  
5  
6  
7  
8  
9  
10  
11  
12  
13  
14  
15  
16  
17  
18  
19  
20  
21  
22  
23  
24  
25  
26  
27  
28  
29  
30  
31  
32  
33  
34  
35  
36  
37  
38  
39  
40  
41

1  
2  
3  
4  
5  
6  
7  
8  
9  
10  
11  
12  
13  
14  
15  
16  
17  
18  
19  
20  
21  
22  
23  
24  
25  
26  
27  
28  
29  
30  
31  
32  
33  
34  
35  
36  
37  
38  
39  
40  
41  
42  
43  
44  
45  
46  
47  
48  
49  
50  
51  
52  
53  
54  
55  
56  
57  
58  
59  
60

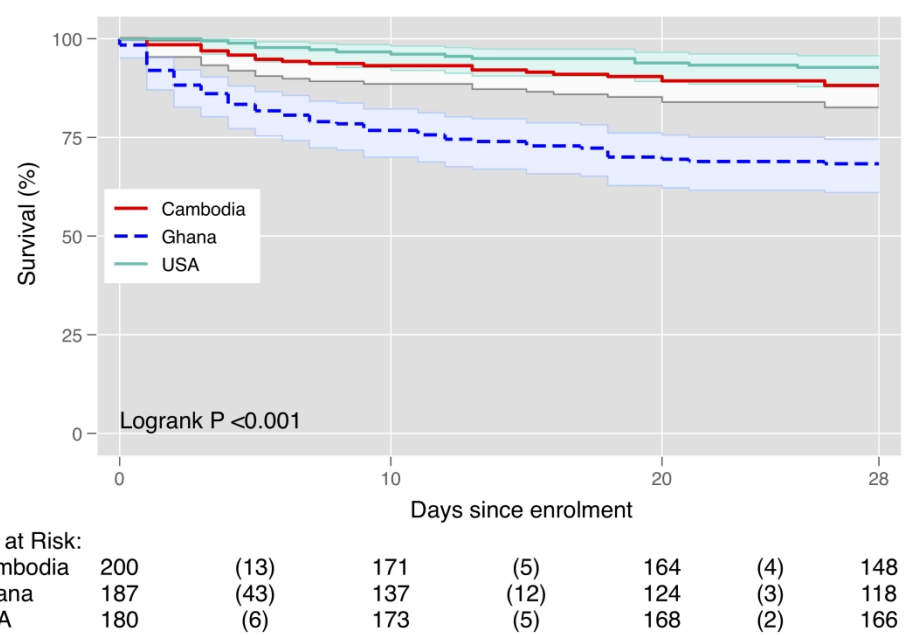

Figure 2. Kaplan-Meier survival plot of 28-day mortality stratified by site.

387x258mm (236 x 236 DPI)





Figure 3. The C-statistic by score overall and by cohort (adjusted for age and sex).

165x96mm (800 x 800 DPI)

**Table S1.** Baseline physiologic and clinical laboratory parameters by site at enrollment.

| <b>Parameter</b>                             | <b>Total<br/>Median (IQR)</b> | <b>Takeo, Cambodia<br/>Median (IQR)</b> | <b>Durham, USA<br/>Median (IQR)</b> | <b>Kumasi, Ghana<br/>Median (IQR)</b> |
|----------------------------------------------|-------------------------------|-----------------------------------------|-------------------------------------|---------------------------------------|
| <b>Physiologic parameters</b>                |                               |                                         |                                     |                                       |
| Respiratory rate (breaths per minute)        | 24 (20, 30)                   | 24 (20, 28)                             | 24 (20, 31)                         | 26 (22, 30)                           |
| Systolic blood pressure (mmHg)               | 120 (100, 130)                | 110 (100, 130)                          | 113 (96, 129)                       | 127.5 (110, 140)                      |
| Diastolic blood pressure (mmHg)              | 70 (60, 80)                   | 70 (70, 80)                             | 64 (56, 75)                         | 80 (60, 90)                           |
| Oxygen saturation (%)                        | 97 (94, 98)                   | 98 (96, 98)                             | 95 (92, 97.5)                       | 97 (95, 98)                           |
| Temperature (°C)                             | 37.9 (37, 38.7)               | 37.5 (37, 38.5)                         | 38.1 (36.9, 38.89)                  | 38.2 (37.4, 38.8)                     |
| Heart rate (beats per minute)                | 105 (94, 118)                 | 96 (86.5, 105.5)                        | 111 (99.5, 124)                     | 111 (99, 118)                         |
| <b>Clinical laboratory parameters</b>        |                               |                                         |                                     |                                       |
| White blood cells (x10 <sup>9</sup> cells/L) | 12.05 (8.13, 16.6)            | 11.9 (8.2, 16.6)                        | 13.35 (9.7, 17.6)                   | 10.76 (7.68, 15.41)                   |
| Platelets (x10 <sup>9</sup> cells/L)         | 222 (152.5, 321.5)            | 262 (169, 366)                          | 236.5 (160, 291)                    | 193 (137, 284)                        |
| Sodium (mEq/L)                               | 135 (132, 138)                | 135 (131, 138)                          | 137 (134, 139)                      | 134 (130, 138)                        |
| Potassium (mEq/L)                            | 3.7 (3.3, 4.2)                | 3.7 (3.2, 4.1)                          | 3.9 (3.5, 4.3)                      | 3.6 (3.2, 4)                          |
| Sodium Bicarbonate (mmol/L)                  | 24 (21, 26)                   | 24 (22, 27)                             | 25 (22, 27)                         | 22 (19, 25)                           |
| Glucose (mg/dL)                              | 6.56 (5.4, 10)                | 6.44 (5.39, 8.28)                       | 6.69 (5.67, 10.06)                  | 6.65 (5.2, 12)                        |
| Blood Urea Nitrogen (mg/dL)                  | 5 (3.57, 7.9)                 | 4.29 (3.21, 5.71)                       | 5.71 (3.57, 10)                     | 5.4 (3.5, 9.4)                        |
| Creatinine (mg/dL)                           | 88.42 (66, 130)               | 79.58 (53.05, 88.42)                    | 106.1 (70.74, 150.31)               | 91 (70, 135)                          |
| Alkaline Phosphatase (U/L)                   | 86.5 (65, 132)                | 98.5 (72, 172)                          | 80 (63, 106)                        | 85 (63, 125)                          |
| Alanine Transaminase (U/L)                   | 32 (22, 58)                   | 46 (27, 86)                             | 22 (18, 40)                         | 29 (22, 48)                           |
| Aspartate Aminotransferase (U/L)             | 42 (27, 76)                   | 61 (38, 117)                            | 29 (21, 45)                         | 35.5 (25, 65)                         |
| Bilirubin (mg/dL)                            | 15 (10.26, 21)                | 13.68 (10.26, 20.52)                    | 15.39 (10.26, 20.52)                | 15 (11, 23)                           |

---

| <b>Parameter</b>     | <b>Total<br/>Median (IQR)</b> | <b>Takeo, Cambodia<br/>Median (IQR)</b> | <b>Durham, USA<br/>Median (IQR)</b> | <b>Kumasi, Ghana<br/>Median (IQR)</b> |
|----------------------|-------------------------------|-----------------------------------------|-------------------------------------|---------------------------------------|
| Albumin (g/dL)       | 3.0 (2.5, 3.5)                | 2.9 (2.5, 3.4)                          | 3.0 (2.5, 3.5)                      | 3.0 (2.3, 3.6)                        |
| Total protein (g/dL) | 73 (65, 79)                   | 74 (68, 79.5)                           | 67 (57, 72)                         | 75 (69, 83)                           |
| Lactate (mmol/L)     | 2.27 (1.66, 3.09)             | 2.33 (1.79, 3.03)                       | 1.5 (1, 2.4)                        | 2.54 (1.8, 3.42)                      |

---

*\*All variables are presented as median, interquartile range*

For peer review only

**Table S2.** Performance characteristics of sepsis score across Cambodia and Ghana sites combined for predicting 28-day mortality.

| Score                            | Sensitivity (95% CI) | Specificity (95% CI) | PPV (95% CI)       | NPV (95% CI)       | Unadjusted Bivariate Cox model C-statistic (95% CI) | Adjusted* Cox model C-statistic (95% CI) | p-value          |
|----------------------------------|----------------------|----------------------|--------------------|--------------------|-----------------------------------------------------|------------------------------------------|------------------|
| <b>Baseline</b>                  |                      |                      |                    |                    |                                                     | 0.60 (0.54 – 0.66)                       |                  |
| <b>MEWS <math>\geq 4</math></b>  | 0.74 (0.64 – 0.84)   | 0.50 (0.44 – 0.56)   | 0.28 (0.25 – 0.32) | 0.88 (0.84 – 0.92) | 0.62 (0.57 – 0.66)                                  | 0.66 (0.61 – 0.72)                       | <b>&lt;0.001</b> |
| <b>NEWS <math>\geq 5</math></b>  | 0.85 (0.75– 0.92)    | 0.46 (0.38– 0.52)    | 0.33 (0.29– 0.36)  | 0.91 (0.85 – 0.94) | 0.65 (0.62 – 0.70)                                  | 0.70 (0.65 – 0.76)                       | <b>0.001</b>     |
| <b>qSOFA <math>\geq 2</math></b> | 0.54 (0.42 – 0.65)   | 0.84 (0.80 – 0.88)   | 0.47 (0.39 – 0.55) | 0.87 (0.84 – 0.90) | 0.67 (0.62 – 0.73)                                  | 0.71 (0.66– 0.77)                        | <b>&lt;0.001</b> |
| <b>SIRS <math>\geq 2</math></b>  | 0.88 (0.78 = 0.94)   | 0.24 (0.19 (0.30)    | 0.23 (0.21 – 24)   | 0.89 (0.81 – 0.94) | 0.55 (0.51 – 0.59)                                  | 0.61 (0.55 – 0.67)                       | 0.066            |
| <b>UVA <math>\geq 2</math></b>   | 0.75 (0.65 – 0.84)   | 0.74 (0.70 – 0.80)   | 0.45 (0.40 - 0.52) | 0.92 (0.88 - 0.94) | 0.73 (0.68 – 0.77)                                  | 0.76 (0.71– 0.81)                        | <b>&lt;0.001</b> |

**Table S3.** Performance characteristics of sepsis score across the United States site for predicting 28-day mortality.

| Score                               | Sensitivity<br>(95% CI) | Specificity<br>(95% CI) | PPV<br>(95% CI)       | NPV<br>(95% CI)      | Unadjusted<br>Bivariate<br>Cox model<br>C-statistic<br>(95% CI) | Adjusted*<br>Cox model<br>C-statistic<br>(95% CI) | p-value |
|-------------------------------------|-------------------------|-------------------------|-----------------------|----------------------|-----------------------------------------------------------------|---------------------------------------------------|---------|
| <b>Baseline<br/>(age +sex)</b>      |                         |                         |                       |                      |                                                                 | 0.61 (0.52 –<br>0.66)                             |         |
| <b>MEWS<math>\geq</math>4</b>       | 0.60 (0.26-<br>0.87)    | 0.33 (0.26<br>–0.41)    | 0.05 (0.03<br>–0.09)  | 0.92 (0.85<br>–0.96) | 0.53 (0.38 –<br>0.67)                                           | 0.68 (0.57 –<br>0.79)                             | 0.743   |
| <b>NEWS<math>\geq</math>5</b>       | 0.90 (0.56 –<br>0.99)   | 0.37 (0.29<br>–0.45)    | 0.09 (0.07<br>–0.11)  | 0.98 (0.89-<br>0.99) | 0.63 (0.54 -<br>0.71)                                           | 0.71 (0.59-<br>0.84)                              | 0.256   |
| <b>qSOFA<br/><math>\geq</math>2</b> | 0.60 (0.26 -<br>87)     | 0.72 (0.65<br>–0.79)    | 0.13 (0.08<br>- 0.20) | 0.96 (0.93<br>–0.98) | 0.66 (0.51 –<br>0.81)                                           | 0.71 (0.54 –<br>0.89)                             | 0.019   |
| <b>SIRS <math>\geq</math>2</b>      | 0.92 (0.64 -<br>0.99)   | 0.11 (0.07<br>–0.16)    | 0.08 (0.07<br>–0.09)  | 0.94 (0.72<br>–0.99) | 0.51 (0.45 –<br>0.58)                                           | 0.66 (0.54 –<br>0.82)                             | 0.694   |
| <b>UVA<math>\geq</math>2</b>        | 0.60 (0.26 –<br>0.88)   | 0.58 (0.50<br>–0.66)    | 0.09 (0.05<br>-0.14)  | 0.95 (0.90<br>-0.98) | 0.59 (0.44 –<br>0.73)                                           | 0.70 (0.50 –<br>0.87)                             | 0.281   |

1  
2  
3  
4  
5  
6  
7  
8  
9  
10  
11  
12  
13  
14  
15  
16  
17  
18  
19  
20  
21  
22  
23  
24  
25  
26  
27  
28  
29  
30  
31  
32  
33  
34  
35  
36  
37  
38  
39  
40  
41  
42  
43  
44  
45  
46  
47  
48  
49  
50  
51  
52  
53  
54  
55  
56  
57  
58  
59  
60



**Supplementary Figure S1.** Distribution of adjudicated pathogen class for each site.

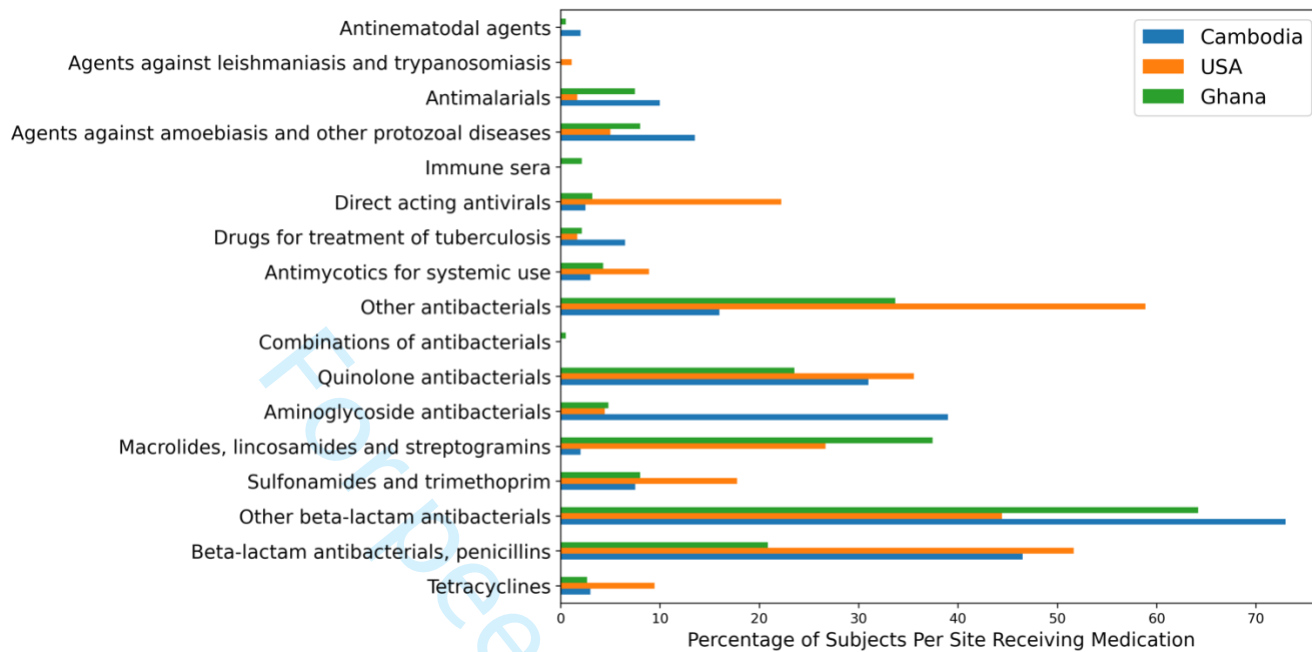

**Supplementary Figure S2.** Prevalence of antibiotics received per site.



**Supplementary Figure S3.** Forest plot of hazard ratios from bivariate Cox regression models for risk of death at 28-day for sepsis scores, physiologic parameters, and clinical laboratory parameters.
