# Supplementary material for: Screening tools for predicting mortality of adults with suspected sepsis: an international sepsis cohort validation study
Source: PubMed Central journal article supplement — BMJ Open. 2023 Feb 20;13(2):e067840. doi: 10.1136/bmjopen-2022-067840 (PMC9944645; doi:10.1136/bmjopen-2022-067840), 2023-02-20
Supplement: bmjopen-2022-067840supp001.pdf [file bmjopen-2022-067840supp001.pdf]

**Table S1.** Baseline physiologic and clinical laboratory parameters by site at enrollment.

| <b>Parameter</b>                             | <b>Total<br/>Median (IQR)</b> | <b>Takeo, Cambodia<br/>Median (IQR)</b> | <b>Durham, USA<br/>Median (IQR)</b> | <b>Kumasi, Ghana<br/>Median (IQR)</b> |
|----------------------------------------------|-------------------------------|-----------------------------------------|-------------------------------------|---------------------------------------|
| <b>Physiologic parameters</b>                |                               |                                         |                                     |                                       |
| Respiratory rate (breaths per minute)        | 24 (20, 30)                   | 24 (20, 28)                             | 24 (20, 31)                         | 26 (22, 30)                           |
| Systolic blood pressure (mmHg)               | 120 (100, 130)                | 110 (100, 130)                          | 113 (96, 129)                       | 127.5 (110, 140)                      |
| Diastolic blood pressure (mmHg)              | 70 (60, 80)                   | 70 (70, 80)                             | 64 (56, 75)                         | 80 (60, 90)                           |
| Oxygen saturation (%)                        | 97 (94, 98)                   | 98 (96, 98)                             | 95 (92, 97.5)                       | 97 (95, 98)                           |
| Temperature (°C)                             | 37.9 (37, 38.7)               | 37.5 (37, 38.5)                         | 38.1 (36.9, 38.89)                  | 38.2 (37.4, 38.8)                     |
| Heart rate (beats per minute)                | 105 (94, 118)                 | 96 (86.5, 105.5)                        | 111 (99.5, 124)                     | 111 (99, 118)                         |
| <b>Clinical laboratory parameters</b>        |                               |                                         |                                     |                                       |
| White blood cells (x10 <sup>9</sup> cells/L) | 12.05 (8.13, 16.6)            | 11.9 (8.2, 16.6)                        | 13.35 (9.7, 17.6)                   | 10.76 (7.68, 15.41)                   |
| Platelets (x10 <sup>9</sup> cells/L)         | 222 (152.5, 321.5)            | 262 (169, 366)                          | 236.5 (160, 291)                    | 193 (137, 284)                        |
| Sodium (mEq/L)                               | 135 (132, 138)                | 135 (131, 138)                          | 137 (134, 139)                      | 134 (130, 138)                        |
| Potassium (mEq/L)                            | 3.7 (3.3, 4.2)                | 3.7 (3.2, 4.1)                          | 3.9 (3.5, 4.3)                      | 3.6 (3.2, 4)                          |
| Sodium Bicarbonate (mmol/L)                  | 24 (21, 26)                   | 24 (22, 27)                             | 25 (22, 27)                         | 22 (19, 25)                           |
| Glucose (mg/dL)                              | 6.56 (5.4, 10)                | 6.44 (5.39, 8.28)                       | 6.69 (5.67, 10.06)                  | 6.65 (5.2, 12)                        |
| Blood Urea Nitrogen (mg/dL)                  | 5 (3.57, 7.9)                 | 4.29 (3.21, 5.71)                       | 5.71 (3.57, 10)                     | 5.4 (3.5, 9.4)                        |
| Creatinine (mg/dL)                           | 88.42 (66, 130)               | 79.58 (53.05, 88.42)                    | 106.1 (70.74, 150.31)               | 91 (70, 135)                          |
| Alkaline Phosphatase (U/L)                   | 86.5 (65, 132)                | 98.5 (72, 172)                          | 80 (63, 106)                        | 85 (63, 125)                          |
| Alanine Transaminase (U/L)                   | 32 (22, 58)                   | 46 (27, 86)                             | 22 (18, 40)                         | 29 (22, 48)                           |
| Aspartate Aminotransferase (U/L)             | 42 (27, 76)                   | 61 (38, 117)                            | 29 (21, 45)                         | 35.5 (25, 65)                         |
| Bilirubin (mg/dL)                            | 15 (10.26, 21)                | 13.68 (10.26, 20.52)                    | 15.39 (10.26, 20.52)                | 15 (11, 23)                           |

---

| <b>Parameter</b>     | <b>Total<br/>Median (IQR)</b> | <b>Takeo, Cambodia<br/>Median (IQR)</b> | <b>Durham, USA<br/>Median (IQR)</b> | <b>Kumasi, Ghana<br/>Median (IQR)</b> |
|----------------------|-------------------------------|-----------------------------------------|-------------------------------------|---------------------------------------|
| Albumin (g/dL)       | 3.0 (2.5, 3.5)                | 2.9 (2.5, 3.4)                          | 3.0 (2.5, 3.5)                      | 3.0 (2.3, 3.6)                        |
| Total protein (g/dL) | 73 (65, 79)                   | 74 (68, 79.5)                           | 67 (57, 72)                         | 75 (69, 83)                           |
| Lactate (mmol/L)     | 2.27 (1.66, 3.09)             | 2.33 (1.79, 3.03)                       | 1.5 (1, 2.4)                        | 2.54 (1.8, 3.42)                      |

---

*\*All variables are presented as median, interquartile range*

**Table S2.** Performance characteristics of sepsis score across Cambodia and Ghana sites combined for predicting 28-day mortality.

| Score                            | Sensitivity<br>(95% CI) | Specificity<br>(95% CI) | PPV<br>(95% CI)    | NPV<br>(95% CI)    | Unadjusted<br>Bivariate<br>Cox model<br>C-statistic<br>(95% CI) | Adjusted*<br>Cox model<br>C-statistic<br>(95% CI) | p-value          |
|----------------------------------|-------------------------|-------------------------|--------------------|--------------------|-----------------------------------------------------------------|---------------------------------------------------|------------------|
| <b>Baseline</b>                  |                         |                         |                    |                    |                                                                 | 0.60 (0.54 – 0.66)                                |                  |
| <b>MEWS <math>\geq 4</math></b>  | 0.74 (0.64 – 0.84)      | 0.50 (0.44–0.56)        | 0.28 (0.25 – 0.32) | 0.88 (0.84 – 0.92) | 0.62 (0.57 – 0.66)                                              | 0.66 (0.61 – 0.72)                                | <b>&lt;0.001</b> |
| <b>NEWS <math>\geq 5</math></b>  | 0.85 (0.75–0.92)        | 0.46 (0.38–0.52)        | 0.33 (0.29–0.36)   | 0.91 (0.85 – 0.94) | 0.65 (0.62 – 0.70)                                              | 0.70 (0.65 – 0.76)                                | <b>0.001</b>     |
| <b>qSOFA <math>\geq 2</math></b> | 0.54 (0.42 – 0.65)      | 0.84 (0.80 – 0.88)      | 0.47 (0.39 – 0.55) | 0.87 (0.84 – 0.90) | 0.67 (0.62 – 0.73)                                              | 0.71 (0.66–0.77)                                  | <b>&lt;0.001</b> |
| <b>SIRS <math>\geq 2</math></b>  | 0.88 (0.78 = 0.94)      | 0.24 (0.19 (0.30)       | 0.23 (0.21 – 24)   | 0.89 (0.81 – 0.94) | 0.55 (0.51 – 0.59)                                              | 0.61 (0.55 – 0.67)                                | 0.066            |
| <b>UVA <math>\geq 2</math></b>   | 0.75 (0.65 – 0.84)      | 0.74 (0.70 – 0.80)      | 0.45 (0.40 - 0.52) | 0.92 (0.88 - 0.94) | 0.73 (0.68 – 0.77)                                              | 0.76 (0.71–0.81)                                  | <b>&lt;0.001</b> |

**Table S3.** Performance characteristics of sepsis score across the United States site for predicting 28-day mortality.

| <b>Score</b>                        | <b>Sensitivity<br/>(95% CI)</b> | <b>Specificity<br/>(95% CI)</b> | <b>PPV<br/>(95% CI)</b> | <b>NPV<br/>(95% CI)</b> | <b>Unadjusted<br/>Bivariate<br/>Cox model<br/>C-statistic<br/>(95% CI)</b> | <b>Adjusted*<br/>Cox model<br/>C-statistic<br/>(95% CI)</b> | <b>p-value</b> |
|-------------------------------------|---------------------------------|---------------------------------|-------------------------|-------------------------|----------------------------------------------------------------------------|-------------------------------------------------------------|----------------|
| <b>Baseline<br/>(age +sex)</b>      |                                 |                                 |                         |                         |                                                                            | 0.61 (0.52 – 0.66)                                          |                |
| <b>MEWS<math>\geq</math>4</b>       | 0.60 (0.26-0.87)                | 0.33 (0.26 – 0.41)              | 0.05 (0.03 – 0.09)      | 0.92 (0.85 – 0.96)      | 0.53 (0.38 – 0.67)                                                         | 0.68 (0.57 – 0.79)                                          | 0.743          |
| <b>NEWS<math>\geq</math>5</b>       | 0.90 (0.56 – 0.99)              | 0.37 (0.29 – 0.45)              | 0.09 (0.07 – 0.11)      | 0.98 (0.89-0.99)        | 0.63 (0.54 - 0.71)                                                         | 0.71 (0.59-0.84)                                            | 0.256          |
| <b>qSOFA<br/><math>\geq</math>2</b> | 0.60 (0.26 - 87)                | 0.72 (0.65 – 0.79)              | 0.13 (0.08 - 0.20)      | 0.96 (0.93 – 0.98)      | 0.66 (0.51 – 0.81)                                                         | 0.71 (0.54 – 0.89)                                          | 0.019          |
| <b>SIRS <math>\geq</math>2</b>      | 0.92 (0.64 - 0.99)              | 0.11 (0.07 – 0.16)              | 0.08 (0.07 – 0.09)      | 0.94 (0.72 – 0.99)      | 0.51 (0.45 – 0.58)                                                         | 0.66 (0.54 – 0.82)                                          | 0.694          |
| <b>UVA<math>\geq</math>2</b>        | 0.60 (0.26 – 0.88)              | 0.58 (0.50 – 0.66)              | 0.09 (0.05 -0.14)       | 0.95 (0.90 -0.98)       | 0.59 (0.44 – 0.73)                                                         | 0.70 (0.50 – 0.87)                                          | 0.281          |

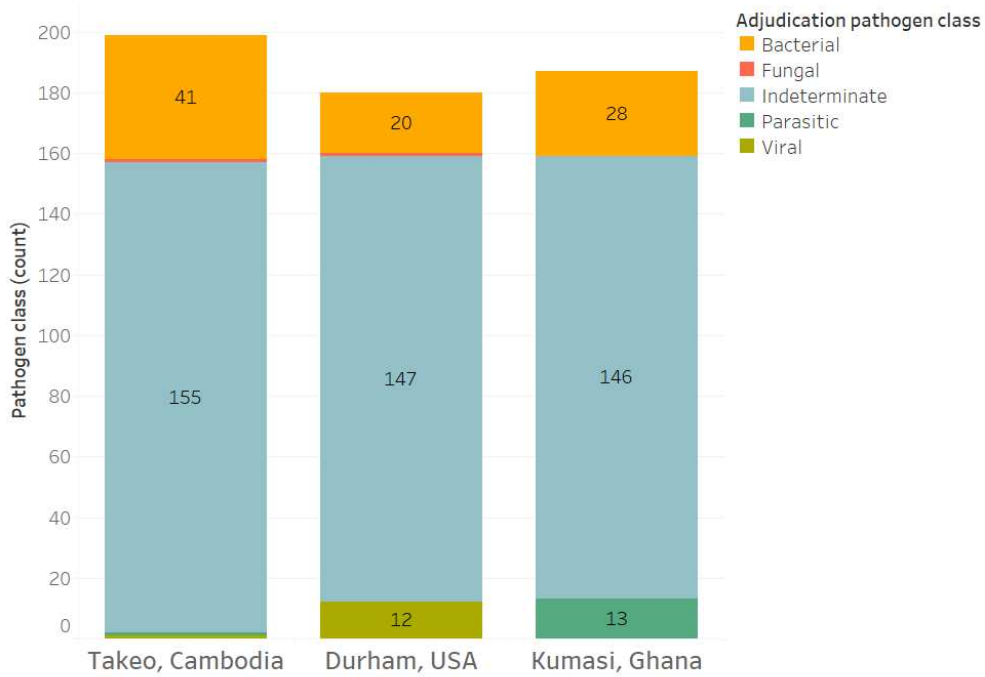

**Supplementary Figure S1.** Distribution of adjudicated pathogen class for each site.

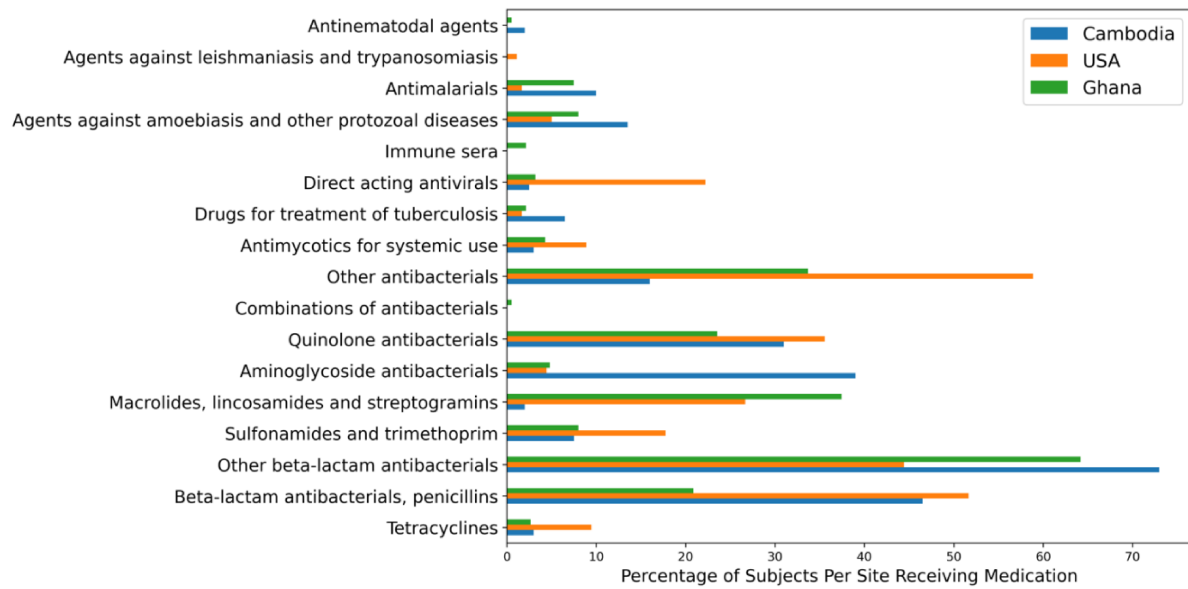

**Supplementary Figure S2.** Prevalence of antibiotics received per site.

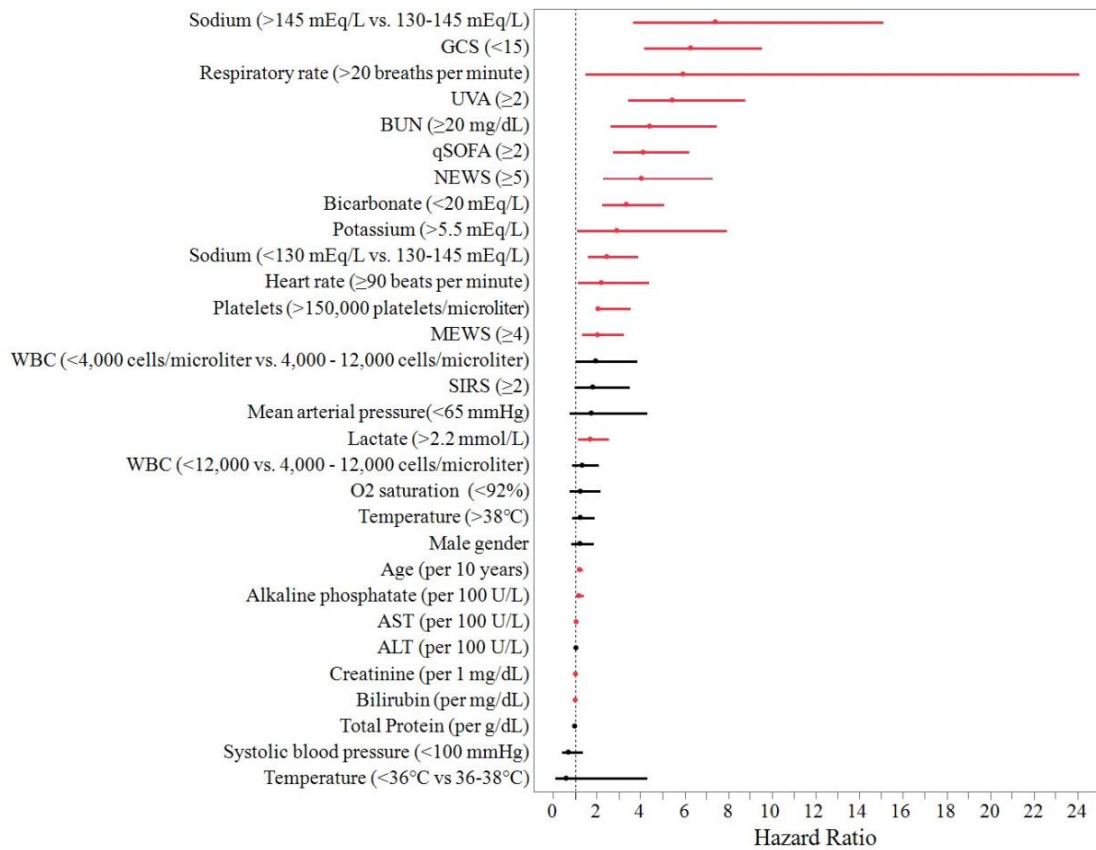

**Supplementary Figure S3.** Forest plot of hazard ratios from bivariate Cox regression models for risk of death at 28-day for sepsis scores, physiologic parameters, and clinical laboratory parameters.
